# Supplementary material for: Interventions targeted at health professionals to reduce unnecessary caesarean sections: a qualitative evidence synthesis
Source: PubMed Central journal article supplement — BMJ Open. 2018 Dec 16;8(12):e025073. doi: 10.1136/bmjopen-2018-025073 (PMC6303601; doi:10.1136/bmjopen-2018-025073), 2018-12-16
Supplement: bmjopen-2018-025073.draft_revisions.pdf [file bmjopen-2018-025073.draft_revisions.pdf]

# BMJ Open

BMJ Open is committed to open peer review. As part of this commitment we make the peer review history of every article we publish publicly available.

When an article is published we post the peer reviewers' comments and the authors' responses online. We also post the versions of the paper that were used during peer review. These are the versions that the peer review comments apply to.

The versions of the paper that follow are the versions that were submitted during the peer review process. They are not the versions of record or the final published versions. They should not be cited or distributed as the published version of this manuscript.

BMJ Open is an open access journal and the full, final, typeset and author-corrected version of record of the manuscript is available on our site with no access controls, subscription charges or pay-per-view fees (<http://bmjopen.bmj.com>).

If you have any questions on BMJ Open's open peer review process please email [info.bmjopen@bmj.com](mailto:info.bmjopen@bmj.com)

# BMJ Open

## Interventions targeted at health professionals to reduce unnecessary caesarean sections: A qualitative evidence synthesis

|                               |                                                                                                                                                                                                                                    |
|-------------------------------|------------------------------------------------------------------------------------------------------------------------------------------------------------------------------------------------------------------------------------|
| Journal:                      | <i>BMJ Open</i>                                                                                                                                                                                                                    |
| Manuscript ID                 | bmjopen-2018-025073                                                                                                                                                                                                                |
| Article Type:                 | Research                                                                                                                                                                                                                           |
| Date Submitted by the Author: | 10-Jul-2018                                                                                                                                                                                                                        |
| Complete List of Authors:     | Kingdon, Carol; University of Central Lancashire, ReaCH group<br>Downe, Soo; University of Central Lancashire, research in childbirth and health<br>Betron, Ana Pilar; World Health Organization, Reproductive Health and Research |
| Keywords:                     | caesarean section, QUALITATIVE RESEARCH, health professionals views, too much medicine                                                                                                                                             |
|                               |                                                                                                                                                                                                                                    |

SCHOLARONE™  
Manuscripts

View Only

1  
2  
3 **Interventions targeted at health professionals to reduce**  
4  
5 **unnecessary caesarean sections: A qualitative evidence synthesis**  
6  
7  
8  
9  
10  
11

12 **Corresponding Author**  
13

14 Dr Carol Kingdon, Senior Research Fellow,  
15  
16 School of Community Health and Midwifery, Faculty of Health and Wellbeing,  
17  
18 University of Central Lancashire, Preston, United Kingdom. PR1 2HE  
19

20  
21 Tel: 07935744004  
22

23 [ckingdon@uclan.ac.uk](mailto:ckingdon@uclan.ac.uk)  
24  
25  
26  
27

28 **Co-authors**  
29

30 Professor Soo Downe, Professor of Midwifery,  
31  
32 School of Community Health and Midwifery, Faculty of Health and Wellbeing,  
33  
34 University of Central Lancashire Preston, United Kingdom. PR1 2HE  
35

36 [sdowne@ulcan.ac.uk](mailto:sdowne@ulcan.ac.uk)  
37  
38  
39

40 Dr. Ana Pilar Betran, Medical Officer,  
41  
42 Department of Reproductive Health and Research, World Health Organization  
43  
44 (WHO), Geneva, Switzerland.  
45

46  
47 [betrana@who.int](mailto:betrana@who.int)  
48  
49  
50

51 **Manuscript word count: 4,572**  
52  
53  
54  
55  
56  
57  
58  
59  
60

## Abstract

**Objective:** To establish the views and experiences of healthcare professionals in relation to interventions targeted at them to reduce unnecessary caesareans.

**Design:** Qualitative evidence synthesis

**Setting:** Studies undertaken in high-, middle- and low-income settings.

**Data sources:** Seven databases (CINAHL, MEDLINE, PsychINFO, EMBASE, Global Index Medicus, POPLINE, African Journals Online). Studies published between 1985 and June 2017, with no language or geographical restrictions. We hand-searched reference lists, and key citations using Google Scholar.

**Study selection:** Qualitative or mixed-method studies reporting health professionals' views

**Data extraction and synthesis:** Two authors independently assessed study quality prior to extraction of primary data and authors' interpretations. The data were compared and contrasted, then grouped into Summary of Findings Statements (SoFs), themes, and a line of argument synthesis. All SoFs were GRADE-CERQual assessed for confidence.

**Results:** 17 papers were included, involving 483 health professionals from 17 countries (nine high-income, six middle-income, and two low-income). Fourteen SoFs were identified, resulting in three core themes: *Philosophy of birth*(4 SoFs); 2) *Social and cultural context*(5 SoFs); and 3) *Negotiation within system*(5 SoFs). The resulting line of argument suggests three key mechanisms of effect for change or resistance to change: prior beliefs about birth; willingness or not to engage with change, especially where this entailed potential loss of income or status (including medico-legal barriers); and capacity or not to influence local community and health care service norms and values relating to CS provision.

**Conclusion:** For maternity care health professionals, there is a synergistic relationship between their underpinning philosophy of birth, the social and cultural context they are working within, and the extent to which they were prepared to negotiate within health system resources to reduce CS rates. These findings provide potential mechanisms of effect that could improve the design and efficacy of change programmes to reduce unnecessary caesareans.

1  
2  
3 **Protocol registration:** PROSPERO 2017 CRD42017059455  
4  
5

6 **Keywords:** Caesarean section, too much medicine, qualitative evidence synthesis,  
7 health professionals  
8  
9

## 10 11 12 **Article summary** 13

### 14 15 **Strengths and limitations of this study** 16

- 17 • Our search strategy is likely to have captured all relevant studies published in  
18 the time period we covered, in all languages.
- 19 • Our findings included obstetricians, midwives, and general practitioners from  
20 high, middle and low income countries, and countries with both high and low  
21 rates of caesarean section.
- 22 • Quality scores for included studies were generally high or moderate. There  
23 was high or moderate confidence on the GRADE-CERQual measure for 11  
24 Summaries of Findings.
- 25 • We only had data from one Asian country (China), one Middle Eastern country  
26 (Iran) and one South American country (Nicaragua).  
27  
28  
29  
30  
31  
32  
33  
34  
35  
36  
37  
38  
39  
40

41 **Funding statement:** This work was supported by the United States Agency for  
42 International Development (USAID); and the UNDP-UNFPA-UNICEF-WHO-World  
43 Bank Special Programme of Research, Development and Research Training in  
44 Human Reproduction (HRP), a cosponsored program executed by the WHO.  
45  
46  
47  
48

49 **Competing interests statement:** "All authors have completed the ICMJE uniform  
50 disclosure form at [www.icmje.org/coi\\_disclosure.pdf](http://www.icmje.org/coi_disclosure.pdf) and declare: no support from  
51 any organisation for the submitted work; no financial relationships with any  
52 organisations that might have an interest in the submitted work in the previous three  
53  
54  
55  
56  
57  
58  
59  
60

1  
2  
3 years; no other relationships or activities that could appear to have influenced the  
4 submitted work.”  
5  
6  
7  
8  
9  
10  
11  
12  
13  
14  
15  
16  
17  
18  
19  
20  
21  
22  
23  
24  
25  
26  
27  
28  
29  
30  
31  
32  
33  
34  
35  
36  
37  
38  
39  
40  
41  
42  
43  
44  
45  
46  
47  
48  
49  
50  
51  
52  
53  
54  
55  
56  
57  
58  
59  
60

For peer review only

## INTRODUCTION

Caesarean section (CS), can prevent deaths and serious complications in mothers and babies when indicated, but there is no evidence of benefit in the absence of clinical or psychological need.[1-3] In 2015, the World Health Organization (WHO) published a new Statement declaring that CS rates higher than 10% are not associated with reductions in mortality, and can cause surgical complications, disability or death, particularly where safe surgery cannot be conducted.[1,4] Recent figures suggest an average global CS rate of 18.6%, ranging from 6.0% to 27.2% in the lowest and highest income regions.[5] Some countries,[6] and some regions within countries,[7] now have CS rates above fifty percent. The WHO statement[1] is a call to action that resonates with other contemporary campaigns[8-9] for the reduction of medical over-diagnosis and over-treatment, to promoting quality care, and to reduce iatrogenic damage and excessive health care costs.[10-11]

Debate in this area spans four decades and two generations.[4,10,12] The highest burden of CS in all income contexts occur in Robson Groups 1-5, which comprise women with singleton, term, cephalic pregnancies with or without a previous CS.[13-15] Reported reasons for rising CS rates in these groups include maternal request and the preferences and practice patterns of health professionals.[16-19] Surveys of obstetrician's personal preference for CS report rates as high as 46% amongst US obstetricians,[20] but less than 2% amongst Flemish,[21] Norwegian[22] and Dutch obstetricians.[23] Practice patterns within and between countries vary.[24-25] Reasons include convenience and ease of undertaking a CS, risk aversion, fear of litigation in societies with growing intolerance to imperfection and in which CS is seen as a protective strategy, financial incentives, and a decline in training and skills to perform forceps and vacuum techniques.[25-27] Healthcare professionals' views of CS differ according to gender, profession and socio-clinical environment, and the dominant opinion of their relevant professional body (which can shift over time).

Existing campaigns to reduce unnecessary medical tests and treatments acknowledge that it is counter-intuitive for many health professionals to accept that their practices may be unnecessary, and that this may partly explain why

1  
2  
3 interventions targeting healthcare providers have had limited or moderate  
4 success.[10,28-29] Single or multicomponent interventions have been tested,  
5 including educational programmes and training to improve adherence to evidenced-  
6 based guidelines; second opinion policies; and audit, feedback and peer-review.  
7 However, health professionals' views are largely missing. This is a gap because  
8 understanding motivations, values and fears is essential for effective change  
9 management. The qualitative evidence synthesis presented in this paper aimed to  
10 identify, appraise and synthesize what health professionals say about interventions  
11 targeted at them to reduce unnecessary CS.  
12  
13  
14  
15  
16  
17  
18  
19

## 20 **METHODS**

21  
22 We conducted a qualitative evidence synthesis using an interpretive, modified, meta-  
23 ethnography approach.[30] The published protocol (supplementary file 1) [31]  
24 specified three objectives relating to (1) educational interventions aimed at improving  
25 adherence to evidence-based clinical practices, (2) second opinion policies, and (3)  
26 audit, feedback and peer-review (replicating the categorisation used in the Cochrane  
27 Review of non-clinical interventions to reduce unnecessary CS).[28,29] A PRISMA  
28 checklist is provided as supplementary file 2.[32]  
29  
30  
31  
32  
33  
34  
35

36 Systematic searches were conducted in March and April 2017 in CINAHL,  
37 MEDLINE, PsychINFO, EMBASE, Global Index Medicus, POPLINE, and African  
38 Journals Online. Search strategies were developed for each database using  
39 guidelines developed by the Cochrane Qualitative Research Methods Group,[33-34]  
40 and strategies for optimising the identification of qualitative studies in specific  
41 databases (example search strategy supplementary file 3).[35-38] No geographic or  
42 language restrictions were imposed. Studies from 1985 onwards were included, as  
43 this was the publication date of the first WHO statement on appropriate childbirth  
44 technology.[4] The reference lists of eligible studies were back- and forward  
45 checked.[39-40] Key articles cited by multiple authors (citation pearls) were checked  
46 on Google Scholar.[28-29,39-41] The authors of relevant published protocols were  
47 contacted.[42-43]  
48  
49  
50  
51  
52  
53  
54  
55  
56  
57  
58  
59  
60



1  
2  
3 Two review authors (CK, SD) independently assessed each abstract for inclusion.  
4 Inclusion criteria were studies: using a qualitative design or mixed methods, that  
5 used qualitative methods for data collection and analysis; in any setting where an  
6 intervention has been developed, communicated, distributed or implemented and  
7 targets health professionals; published after 1985 onwards; in any language; and a  
8 full manuscript was accessible. Exclusion criteria included clinical interventions  
9 targeted at Robson groups 6-10. The full texts of all potentially relevant papers were  
10 retrieved and independently assessed by CK and SD, and checked by APB,  
11 following translations by a native Chinese speaker for three Chinese-language  
12 articles.[44-46] An additional two papers were identified after the completion of this  
13 screening process, one included[47] and one excluded.[48]  
14  
15  
16  
17  
18  
19  
20  
21  
22

23 We undertook a qualitative evidence synthesis using a meta-ethnography  
24 approach,[30] comprising five stages 1) Familiarisation and quality assessment, 2)  
25 Data extraction, 3) Coding into Summaries of Findings (SoFs), 4) Interpretative  
26 synthesis, including thematic analysis and creation of a line of argument synthesis, 5)  
27 CERQual[49,50] assessment of the SoFs (supplementary file 4). Peripheral studies  
28 that were theoretically relevant to the general topic, but that did not meet the full  
29 criteria for inclusion, were used to test the line of argument 'fit' (Supplementary file  
30 5).  
31  
32  
33  
34  
35  
36  
37  
38  
39

40 Reflexivity is a key component of qualitative research.[51] APB is a medical officer  
41 with over 15 years of experience in maternal and perinatal health research and  
42 public health and has witnessed the sense of helplessness and the barriers  
43 governments experienced when trying to reduce unnecessary CS. CK, a medical  
44 sociologist, came to the project with prior beliefs about the complexity and  
45 interdependency of social factors driving CS rates, principally informed by  
46 undertaking earlier primary research with women and health professionals in the  
47 UK.[24,52] SD, a Professor of Midwifery, has experienced the barriers clinical staff  
48 encounter when they try to use their clinical judgement and skills alongside personal  
49 values and knowledge of the current evidence base, and the views and choices of  
50 childbearing women, to decide if a particular test or treatment is appropriate for a  
51  
52  
53  
54  
55  
56  
57  
58  
59  
60

1  
2  
3 particular mother and/or baby, rather than just applying the same rules to all  
4 regardless of need or choice.  
5

## 6 **Patient and public involvement**

7  
8 Patients were not involved in the design or conduct of this review.  
9  
10

## 11 **RESULTS**

12  
13  
14 Seventeen studies were included from 17 countries in all WHO regions except SE  
15 Asia (Australia, Canada, China, Ethiopia, Finland, Germany, Iran, Ireland, Italy,  
16 Kenya, Netherlands, Nicaragua, Sweden, Tanzania, Uganda, UK, USA).[44-47,54-  
17 66] Studies encompassed countries with the highest and lowest CS rates globally,  
18 and from high, middle and low income settings.[5] See Figure 1:PRISMA Diagram.  
19 Individual studies included between nine and 71 health professionals. Ten studies  
20 were graded A or B for quality. Six were graded C, and one D. Two studies  
21 undertaken alongside RCTs were identified. Both were excluded. One was not  
22 focused on CS.[48] The other did not use qualitative methods.[53] Six included  
23 studies focused on health professional's views in relation to clinical practice  
24 guidelines[47,55,58] and change initiatives.[57,59,62] Eleven explored barriers and  
25 facilitators to CS reduction more generally, and reported data relating to guidelines,  
26 policy initiatives, second opinion strategies, audit, feedback and peer-review.[44-  
27 46,54,56,60-61,63-65] Seven studies had an explicit focus on vaginal birth after  
28 caesarean (VBAC).[54,56,58,59,62]  
29  
30  
31  
32  
33  
34  
35  
36  
37  
38  
39  
40  
41

42 Table 1 details the characteristics of included studies and their quality assessment  
43 grade. Table 2 reports the Summary of Findings (SoFs), along with their  
44 CERQual[49,50] ratings. The more detailed Summary of evidence profile table is  
45 available as a supplementary file. Fourteen SoFs statements were derived. They  
46 mapped onto three distinct themes (Table 3): *Philosophy of birth* (4 SoFs); *Social*  
47 *and cultural context* (5 SoFs); and *Negotiation within the system* (5 SoFs). Additional  
48 quotes are provided in Box 1.  
49  
50  
51  
52  
53  
54  
55  
56  
57  
58  
59  
60

**Table 1. Characteristics of included studies and quality assessment**

| Author            | Aim                                                                                                                                                                                                                    | Country (Region)                             | Resource | Setting         | Number of participants | Type of participant                            | Method                                      | Quality Assessment |
|-------------------|------------------------------------------------------------------------------------------------------------------------------------------------------------------------------------------------------------------------|----------------------------------------------|----------|-----------------|------------------------|------------------------------------------------|---------------------------------------------|--------------------|
| Melman (2017)     | To explore barriers and facilitators for delivering optimal care as described in clinical practice guidelines                                                                                                          | The Netherlands (European)                   | High     | Rural and urban | 30                     | Obstetricians and Midwives                     | Telephone interviews and focus groups       | B                  |
| Foureur (2017)    | To explore the views and experiences of providers in caring for women considering VBAC                                                                                                                                 | Australia (Western Pacific)                  | High     | Urban           | 18                     | Obstetricians and Midwives                     | Semi-structured interviews                  | B                  |
| Lundgren (2016)   | To explore the views of clinicians from countries with low VBAC rates on factors of importance for improving VBAC rates                                                                                                | Ireland, Italy and Germany (European)        | High     | Rural and Urban | 71                     | Obstetricians, midwives, neonatologist and GP  | Focus groups                                | A-                 |
| Lundgren (2015)   | To investigate the views of clinicians working in countries with high VBAC rates on factors of importance for improving VBAC rates                                                                                     | Finland, Sweden, the Netherlands (European)  | High     | Rural and urban | 44                     | Obstetricians and Midwives                     | Interviews and focus groups                 | A-                 |
| Litorp (2015)     | To explore obstetric caregivers' rationales for their hospital's CS rate to identify factors that might cause CS overuse.                                                                                              | Tanzania (African)                           | Low      | Urban           | 32                     | Obstetricians and Midwives                     | Observation, interviews and focus groups    | A                  |
| Marshall (2015)   | To evaluate the 'Focus on Normal Birth and Reducing Caesarean section Rates' programme                                                                                                                                 | UK (European)                                | High     | Rural and urban | 16                     | Obstetricians and Midwives                     | Semi-structured interviews                  | B                  |
| Colomar (2014)    | To assess opinions of the determinants of the high rate of caesarean births in Nicaragua as well as possible barriers to and facilitators of optimal caesarean birth rates.                                            | Nicaragua (Americas)                         | Middle   | Unclear         | 17                     | Doctors and obstetric decision makers          | Focus Groups                                | A                  |
| Lofti (2014)      | To explore effective strategies to reduce caesarean delivery rates in Iran                                                                                                                                             | Iran (Eastern Mediterranean)                 | Middle   | Unclear         | 10                     | Obstetricians and midwives                     | Semi-structured interviews                  | C                  |
| Dunn (2013)       | To reduce high rates of ERCS < 39 weeks across the Eastern Ontario region                                                                                                                                              | Canada (Americas)                            | High     | Unclear         | 9                      | Nursing Directors and Mangers                  | Key informant interviews                    | C                  |
| Wang (2013)       | To explore reasons for obstetric medical staff choosing caesarean section for themselves in the absence of medical indication                                                                                          | China (Western Pacific)                      | Middle   | Urban           | 11                     | Health Professionals                           | Semi-structured Interviews                  | C                  |
| Liu (2010)        | To explore affecting factors of continuing increasing in caesarean section rate in rural area                                                                                                                          | China (Western Pacific)                      | Middle   | Rural           | 9                      | Health Professionals                           | Focus Groups                                | C                  |
| Cox (2011)        | To explore the barriers associated with the ACOG VBAC guidelines                                                                                                                                                       | USA (Americas)                               | High     | Rural and urban | 24                     | Obstetricians, midwives and an administrator   | Semi-structured interviews                  | A-                 |
| Yazdizadeh (2011) | To identify barriers of reduce the caesarean section rate in Iran, as perceived by obstetricians and midwives as the main behavioural change target groups                                                             | Iran (Eastern Mediterranean)                 | Middle   | Urban           | 26                     | Hospital directors, obstetricians and midwives | In-depth interviews                         | A-                 |
| Wanyonyi (2010)   | To determine perceptions on the practice of vaginal birth after Caesarean section among maternity service providers in East Africa and possible solutions (including acceptability of evidence, guidelines, and audit) | Kenya, Uganda, Tanzania, Ethiopia, (African) | Low      | Unclear         | 63                     | Doctors and midwives                           | Semi-structured questionnaire               | C-                 |
| Chen (2008)       | To explore informed choice and autonomy of uterine-incision delivery making in China                                                                                                                                   | China (Western Pacific)                      | Middle   | Urban           | 51                     | Health Professionals                           | In-depth interviews                         | D                  |
| Chaillet (2007)   | To investigate obstetricians perceptions of clinical practice guidelines, and to identify the barriers to, facilitators of, and obstetricians' solutions for implementing these guidelines in practice                 | Canada (Americas)                            | High     | Urban           | 27                     | Obstetricians                                  | Focus groups and semi-structured interviews | C                  |
| Kamal (2005)      | To explore the views of health professionals on the factors influencing repeat caesarean section                                                                                                                       | UK (European)                                | High     | Urban           | 25                     | Doctors and midwives                           | Semi-structured interviews                  | A                  |

Table 2. CERQual Summary of findings (SoFs)

| Review finding                                                                                                                                                                                                                                                                                                                                                                                                                                                                                                                                                                                                                                                                                                                                                                                                                                                                                                                                                                                                                                                                                                                                                                                                                                                                                                | Studies contributing to review finding | CERQual Assessment  | Explanation of confidence in the evidence assessment                                                                                                                                                                                                                     |
|---------------------------------------------------------------------------------------------------------------------------------------------------------------------------------------------------------------------------------------------------------------------------------------------------------------------------------------------------------------------------------------------------------------------------------------------------------------------------------------------------------------------------------------------------------------------------------------------------------------------------------------------------------------------------------------------------------------------------------------------------------------------------------------------------------------------------------------------------------------------------------------------------------------------------------------------------------------------------------------------------------------------------------------------------------------------------------------------------------------------------------------------------------------------------------------------------------------------------------------------------------------------------------------------------------------|----------------------------------------|---------------------|--------------------------------------------------------------------------------------------------------------------------------------------------------------------------------------------------------------------------------------------------------------------------|
| <b>Philosophy of birth</b>                                                                                                                                                                                                                                                                                                                                                                                                                                                                                                                                                                                                                                                                                                                                                                                                                                                                                                                                                                                                                                                                                                                                                                                                                                                                                    |                                        |                     |                                                                                                                                                                                                                                                                          |
| <b>Beliefs about birth:</b> Across HIC and MICs health professionals reported varying beliefs about birth. These included a common approach to birth shared by obstetricians and midwives who valued the physiological process and worked effectively as a team to make it happen (recognising it as an empowering process for women and only intervening when medically necessary), to labour and vaginal birth as a fatally flawed physiological process with CS the preferable means to an end. This dichotomy of beliefs reflected competing ideologies of birth and shaped the importance individuals attached to CS rate reduction. In MIC, while some obstetricians who preferred CS made reference to perinatal mortality and morbidity gains, this was not the experience of the few female, Chinese obstetricians who actually had CDMR, nor the preference of Iranian obstetricians who expressed concerns about having to deal with co-morbidities caused by previous CSs. Beliefs were influenced by professional training, personal experience, and practice setting.                                                                                                                                                                                                                           | 44-46,54,57-62,64-66                   | Moderate confidence | 13 studies with minor to significant methodological limitations. Rich data from 14 countries across 4 geographical regions, high- and middle- income levels, and high and low CS rates. Reasonable level of coherence with uncertain confidence in low-income countries. |
| <b>Beliefs about what constitutes necessary and unnecessary CS:</b> Some health professionals reported CS rates as determined by factors beyond their control (i.e. uncertain obstetric history, unfolding obstetric circumstance and clinical indications), but between health professionals there was no clear consensus as to what they believed to be clinical indications across time (i.e. breech), place (i.e. availability and access) and parity (i.e. women with a previous CS). Some senior doctors and midwives expressed concerns that less experienced staff are more likely to perform CS based on vague indications and spoke favourably about wanting junior staff to consult them more for a second opinion. Other senior staff suggested second opinion policies only work where both doctors are in attendance at the hospital. While some residents also reported wanting improved communication, they feared seeking a second opinion would negatively impact their clinical credibility and career.                                                                                                                                                                                                                                                                                    | 47,54-57,63                            | Low confidence      | 6 studies with minor to moderate methodological limitations. Thin data, with major concerns about coherence across settings.                                                                                                                                             |
| <b>Beliefs about the evidence-base surrounding caesarean section:</b> Health professionals' views about research evidence varied. Most health professionals recognised that guidelines represent the national or international evidence-base, which sensitised them to reflect on their practice, providing a potential mechanism for change. Most health professionals wanted more evidence of transferability to their own practice context, particularly in MIC and LIC contexts, where audit was not common. Not all health professionals believed available evidence to be valid, applicable to their practice, or feasible to implement, and spoke about keeping-up-to-date with the latest evidence as challenging. Across resource settings obstetricians and midwives expressed concerns about evidence of risks associated with CS as incomplete. Some health professionals who valued guidelines were also very clear they took other factors into account in actual decision-making (i.e. interpersonal relationships, patient's unique characteristics).                                                                                                                                                                                                                                         | 54-55, 57-59,61-64                     | Moderate confidence | 10 studies with minor to moderate methodological limitations. Rich data from across 3 geographical regions but limited data from LICs. High coherence across HICs and MICs. Uncertain confidence in LICs.                                                                |
| <b>Belief in need to reduce unnecessary CS and receptiveness to change:</b> Across resource settings health professionals reported concerns about high CS rates and associated morbidity. In Iran and Tanzania some health professionals spoke about colleagues who performed CS for non-medical reasons as contravening medicines underlying ethical principle to do no harm. In European settings, health professionals experienced interventions targeted to reduce unnecessary CS as most acceptable where this vision was shared within and between multi-disciplinary groups. In the UK and Scandinavia, health professionals from organisations that achieved success in reducing rates had positive attitudes towards critical self-reflection (including audit, second opinion and continuing medical education) and felt supported by colleagues and opinion leaders. Across resource settings health professionals acknowledged concerted action to reduce unnecessary CS as challenging, but achievable and intrinsically rewarding where there was respect, accountability, and shared responsibility to support women achieve a vaginal birth.                                                                                                                                                  | 54-55, 57-59,61-64                     | Moderate confidence | 9 studies with no to moderate methodological limitations. Thick data from Europe. Only one study from African region contributed to this finding. High coherence.                                                                                                        |
| <b>Social and cultural context</b>                                                                                                                                                                                                                                                                                                                                                                                                                                                                                                                                                                                                                                                                                                                                                                                                                                                                                                                                                                                                                                                                                                                                                                                                                                                                            |                                        |                     |                                                                                                                                                                                                                                                                          |
| <b>Fear of blame and recrimination (including medico-legal concerns):</b> Across HIC, MIC and LICs health professionals reported fear of litigation as an important influence on their low threshold for performing CS (although no-one had actual experience of litigation in LIC). Predominantly in North America health professionals described medico-legal concerns as an underlying factor in non-compliance to guideline recommendations. Across urban and rural settings with or without 24-hour obstetrical and anaesthesia coverage, obstetricians and midwives weighed up the balance of professional identity risk with not intervening, a poor outcome ensuing and a medico-legal case against them. Also in North America some obstetricians were opposed to second-opinion policies because of the difficulties in medico-legal responsibilities that could ensue. In North America, some European countries and Africa, midwives and obstetricians expressed concerns about threats to their professional identity and career prospects posed by internal audit and feedback. A few health professionals welcomed guidelines as providing a defensible basis for their practice, while other midwives and obstetricians were undeterred in their commitment to intervene only when necessary. | 45,54-55,57-58,61,63-64                | Moderate confidence | 8 studies, with no to moderate methodological limitations. Rich data from 5 countries. Moderate coherence.                                                                                                                                                               |
| <b>Value attached to financial rewards associated with CS:</b> Some health professionals were outspoken about the economic incentives for CSs, particularly in private healthcare facilities. This included doctors in Tanzania, Iran, China and Nicaragua, as well as midwives in Iran and the USA. Some doctors considered CS to involve more work, which justified the payment; others blamed the system, while others still reported personally valuing this extra income.                                                                                                                                                                                                                                                                                                                                                                                                                                                                                                                                                                                                                                                                                                                                                                                                                                | 45,47,55,57-58,60-61,63                | Moderate confidence | 8 studies with minor to moderate methodological limitations. Rich data predominantly from middle-income countries.                                                                                                                                                       |

|                                                                                                                                                                                                                                                                                                                                                                                                                                                                                                                                                                                                                                                                                                                                                                                                                                                                                                                                                                  |                            |                     |                                                                                                                                                                                                                 |
|------------------------------------------------------------------------------------------------------------------------------------------------------------------------------------------------------------------------------------------------------------------------------------------------------------------------------------------------------------------------------------------------------------------------------------------------------------------------------------------------------------------------------------------------------------------------------------------------------------------------------------------------------------------------------------------------------------------------------------------------------------------------------------------------------------------------------------------------------------------------------------------------------------------------------------------------------------------|----------------------------|---------------------|-----------------------------------------------------------------------------------------------------------------------------------------------------------------------------------------------------------------|
| Some doctors, and midwives, were critical of insufficient monetary reward to staff labour and vaginal birth by comparison.                                                                                                                                                                                                                                                                                                                                                                                                                                                                                                                                                                                                                                                                                                                                                                                                                                       |                            |                     | High coherence.                                                                                                                                                                                                 |
| <b>Preferences for CS as convenient:</b> Health professionals valued both the scheduling CS offers and the lesser time commitment it entails compared with labour and vaginal birth. Some health professionals described how CS was convenience for women too (for the same reasons), although others recognised while CS might be more convenient for them, it is not what every woman wants.                                                                                                                                                                                                                                                                                                                                                                                                                                                                                                                                                                   | 46,57-61,63                | Moderate confidence | 7 studies with minor to moderate methodological limitations. Fairly rich data from 2 studies and convenience a theme in a third. High coherence.                                                                |
| <b>Beliefs about women:</b> Across the world, health professionals reported women's demand for a particular birth method as an important factor influencing rates of CS, NVD and VBAC. Some health professionals believed women now value CS as a consumer choice (available in public and private healthcare settings), others attributed increasing rates to women's lower threshold for CS during labour. In HIC, MICs and one LIC (Tanzania), a few health professionals spoke about women's innate ability to labour and birth as being diminished by rising BMIs, advanced maternal age, sedentary lifestyles and "western diseases". Health professionals also perceived women as lacking in antenatal education, being influenced by their families, and the plethora of information about birth available in the media and on-line.                                                                                                                     | 45-47,54-61,63-66          | High confidence     | 15 studies with no to moderate methodological limitations. Thick data from 15 countries, across 5 world regions, high-, middle- and low-income settings with high CSRs. High coherence.                         |
| <b>Dysfunctional teamwork, within the medical profession and including the marginalization of midwives:</b> Health professionals reported dysfunctional teamwork within and between professionals as an important barrier to reducing unnecessary CS rates. Medicine's entrenched hierarchies, lack of communication between maternity and theatre staff, and difficult relationships between obstetricians, midwives and family doctors were all spoken about. Some midwives and obstetricians spoke passionately about the marginalization of midwives and their exclusion from birth as counterproductive.                                                                                                                                                                                                                                                                                                                                                    | 47,55-63,65                | Moderate confidence | 11 studies with minor to moderate methodological limitations. Thick data from across resource settings. High coherence.                                                                                         |
| <b>Negotiation within the system</b>                                                                                                                                                                                                                                                                                                                                                                                                                                                                                                                                                                                                                                                                                                                                                                                                                                                                                                                             |                            |                     |                                                                                                                                                                                                                 |
| <b>Organisation of care:</b> Across the world, health professionals perceived the maternity care system as insufficiently resourced (human and material). Midwives and Obstetricians reported where CS was an important source of revenue operating facilities were a priority, and facilities for labouring women were poor and inadequately staffed.                                                                                                                                                                                                                                                                                                                                                                                                                                                                                                                                                                                                           | 47,55-59,61-63,65          | Moderate confidence | 10 studies with no to moderate methodological limitations. Thin data from 13 countries, and thick data from Iran. High coherence.                                                                               |
| <b>Beliefs about need for high-level infrastructures:</b> Health professionals in HICs who were supportive of VBAC were flexible in their interpretation of guidelines and used them and available technologies in a facilitative way. Other health professionals, predominantly from MICs and LICs, but some from HICs, expressed concerns that a lack of human and technological resource made guideline recommendations unworkable in practice. In HICs where 24-hour obstetrical and anaesthesia cover was available, some health professionals reported women were still refused a trial of labour.                                                                                                                                                                                                                                                                                                                                                         | 47,54-66                   | Moderate confidence | 14 studies with no to moderate methodological limitations. Thick data from HICs and MICs. The finding may have higher confidence in settings where the level of resource is sufficient to sustain necessary CS. |
| <b>Reluctance to change based on lack of training, skills or experience:</b> Some health professionals spoke about how pre-and post-registration training has ill-equipped the next generation for a reduction in CS rates as they have little experience, competency or confidence in normal labour and vaginal birth. Others reported wanting specific training on recommendations to make them more acceptable in practice. Reasons for many health professionals lack of buy-in was multifactorial - see also Organisation of care; Beliefs about need for complex infrastructure; and Beliefs about the clinical encounter and autonomous decision-making                                                                                                                                                                                                                                                                                                   | 45,47,55-57,59,61,65-66    | Low confidence      | 9 studies with minor to significant methodological limitations. Thick data from one study. Extent of coherence unclear.                                                                                         |
| <b>Views about the format, content and delivery of interventions:</b> A few health professionals spoke about the importance of the tone of guidance as facilitative of reflection, not dictatorial, judgmental or threatening, at the same time as being clear about the need for change by avoiding the use of words such as 'should', 'developmental' or 'pilot.' Some health professionals described how important it was for local opinion leaders to endorse projects, and where external facilitators were involved they are 'credible' and 'grounded', exercised cultural humility, and understand the challenges within specific practice settings. In some HICs, health professionals talked about multi-disciplinary /inter-professional team involvement meaning representatives from medicine (obstetrics, anaesthesia, paediatrics), nursing and midwifery, allied health professionals, quality, health records, and scheduling in secondary care. | 55,57,59,61-63             | Low confidence      | 6 studies with minor to significant methodological limitations. Thick data from one study. Extent of coherence unclear.                                                                                         |
| <b>Beliefs about the clinical encounter and autonomous decision-making:</b> Obstetricians and midwives' views varied as to who they thought should have the final say in the decision to perform a CS. Some health professionals accepted a woman's right to choose CS, many thought the decision should be shared, while others believed the decision could only be made by health professionals qualified to do so. Some health professionals expressed concern time constraints in practice limited their opportunities to facilitate informed decision-making. Where teams had a shared approach, they reported informed decision-making did happen and irrespective of who made the final decision everyone involved was reassured by the process.                                                                                                                                                                                                          | 44-47,54-55,57-59,61-62,66 | Moderate confidence | 14 studies with no to significant methodological limitations. Thick data from HICs, MICs and one LIC. High coherence.                                                                                           |

**Table 3. Summary of initial concepts, emergent themes and final themes**

| Initial concepts                                                                 | Emergent themes/SoFs                                                                                       | Studies contributing to review finding | Final themes                                                                                                                                                                                                                                                                                                                                                                                                        |
|----------------------------------------------------------------------------------|------------------------------------------------------------------------------------------------------------|----------------------------------------|---------------------------------------------------------------------------------------------------------------------------------------------------------------------------------------------------------------------------------------------------------------------------------------------------------------------------------------------------------------------------------------------------------------------|
| Belief in a common approach to birth across obstetrics and midwifery             | <b>Beliefs about birth</b>                                                                                 | 44-46,54,57-62,64-66                   | <b>Underpinning philosophy of beliefs about birth</b> informs both the importance health professionals attach to reducing unnecessary CS and the effectiveness of healthcare teams to do so with <i>competing knowledge claims about what are clinically necessary and unnecessary CS across time, place and discipline</i> used by health professionals to either endorse or dispute the value of CS <i>per se</i> |
| Belief in value of physiological labour and vaginal birth                        |                                                                                                            |                                        |                                                                                                                                                                                                                                                                                                                                                                                                                     |
| Belief in CS as progressive for birth                                            |                                                                                                            |                                        |                                                                                                                                                                                                                                                                                                                                                                                                                     |
| Doubts about the value of CS and concerns about co-morbidities                   |                                                                                                            |                                        |                                                                                                                                                                                                                                                                                                                                                                                                                     |
| Belief CS rate determined by factors beyond health professionals control         | <b>Beliefs about what constitutes necessary and unnecessary CS</b>                                         | 47,54-57,63                            |                                                                                                                                                                                                                                                                                                                                                                                                                     |
| Ambiguity surrounding medical indications for CS                                 |                                                                                                            |                                        |                                                                                                                                                                                                                                                                                                                                                                                                                     |
| Views and experiences of seeking a second opinion                                |                                                                                                            |                                        |                                                                                                                                                                                                                                                                                                                                                                                                                     |
| Evidence as mechanism for change                                                 | <b>Beliefs about the evidence-base surrounding caesarean section</b>                                       | 54-55, 57-59,61-64                     |                                                                                                                                                                                                                                                                                                                                                                                                                     |
| Evidence as incomplete, unconvincing or not applicable                           |                                                                                                            |                                        |                                                                                                                                                                                                                                                                                                                                                                                                                     |
| Views about guideline adherence and local audit                                  |                                                                                                            |                                        |                                                                                                                                                                                                                                                                                                                                                                                                                     |
| Belief CS rates are too high                                                     | <b>Belief in need to reduce unnecessary CS and receptiveness to change</b>                                 | 54-55, 57-59,61-64                     |                                                                                                                                                                                                                                                                                                                                                                                                                     |
| Belief unnecessary CS is unethical, negligent practice                           |                                                                                                            |                                        |                                                                                                                                                                                                                                                                                                                                                                                                                     |
| Positive attitudes towards guidelines, 2nd opinion, audit and feedback           |                                                                                                            |                                        |                                                                                                                                                                                                                                                                                                                                                                                                                     |
| Fear of blame in event of poor outcome of NVD                                    | <b>Fear of blame and recrimination (including medico-legal concerns)</b>                                   | 45,54-55,57-58,61,63-64                | <b>Social and cultural context</b> exerts an important influence on health professional's commitment to reducing CS rates. This includes fear of blame and medico-legal concerns, financial incentives and health professionals perceptions of women                                                                                                                                                                |
| Fear of threat to professional identify and career progression                   |                                                                                                            |                                        |                                                                                                                                                                                                                                                                                                                                                                                                                     |
| Fear of litigation                                                               |                                                                                                            |                                        |                                                                                                                                                                                                                                                                                                                                                                                                                     |
| Value greater monetary reward associated with CS                                 | <b>Value attached to financial rewards associated with CS</b>                                              | 45,47,55,57-58,60-61,63                |                                                                                                                                                                                                                                                                                                                                                                                                                     |
| Value scheduling CS and less time commitment compared NVD                        | <b>Preferences for CS as convenient</b>                                                                    | 46,57-61,63                            |                                                                                                                                                                                                                                                                                                                                                                                                                     |
| Perception women are changing                                                    | <b>Beliefs about women</b>                                                                                 | 45-47,54-61,63-66                      |                                                                                                                                                                                                                                                                                                                                                                                                                     |
| Perceptions of what woman want                                                   |                                                                                                            |                                        |                                                                                                                                                                                                                                                                                                                                                                                                                     |
| Belief women lack confidence in NVD                                              |                                                                                                            |                                        |                                                                                                                                                                                                                                                                                                                                                                                                                     |
| No team work within profession/not easy to listen to opinion of peers            |                                                                                                            |                                        |                                                                                                                                                                                                                                                                                                                                                                                                                     |
| Little or no cross-professional working                                          | <b>Dysfunctional teamwork, within the medical profession and including the marginalization of midwives</b> | 47,55-63,65                            |                                                                                                                                                                                                                                                                                                                                                                                                                     |
| Marginalization of MWs                                                           |                                                                                                            |                                        |                                                                                                                                                                                                                                                                                                                                                                                                                     |
| Concerns about the organisation of care                                          |                                                                                                            |                                        |                                                                                                                                                                                                                                                                                                                                                                                                                     |
| Insufficient human resource                                                      | <b>Organisation of care</b>                                                                                | 47,55-59,61-63,65                      | <b>Health professionals may negotiate health system factors</b> in accordance with their underpinning philosophy about birth, women and medicine, where the level of resource is sufficient to sustain necessary CS should a clinical need arise                                                                                                                                                                    |
| Need 24-hour anaesthetic cover                                                   |                                                                                                            |                                        |                                                                                                                                                                                                                                                                                                                                                                                                                     |
| Need 24-hour consultant cover                                                    |                                                                                                            |                                        |                                                                                                                                                                                                                                                                                                                                                                                                                     |
| Need for more equipment                                                          |                                                                                                            |                                        |                                                                                                                                                                                                                                                                                                                                                                                                                     |
| Challenges to need for technology                                                | <b>Beliefs about need for high-level infrastructures</b>                                                   |                                        |                                                                                                                                                                                                                                                                                                                                                                                                                     |
| Belief strategy /intervention would not be effective                             |                                                                                                            |                                        |                                                                                                                                                                                                                                                                                                                                                                                                                     |
| Pre- and post-registration education does not prioritise NVD skills and training |                                                                                                            |                                        |                                                                                                                                                                                                                                                                                                                                                                                                                     |
| Perception insufficient time to implement                                        |                                                                                                            |                                        |                                                                                                                                                                                                                                                                                                                                                                                                                     |
| Perception insufficient resources                                                | <b>Reluctance to change based on lack of training, skills or experience</b>                                | 45,47,55-57,59,61,65-66                |                                                                                                                                                                                                                                                                                                                                                                                                                     |
| Positive tone of intervention (reflective, facilitative)                         |                                                                                                            |                                        |                                                                                                                                                                                                                                                                                                                                                                                                                     |
| Without fear of blame or threat to professional identify                         |                                                                                                            |                                        |                                                                                                                                                                                                                                                                                                                                                                                                                     |
| Use of language (i.e. not conditional verb tense – should)                       |                                                                                                            |                                        |                                                                                                                                                                                                                                                                                                                                                                                                                     |
| Women's right to choose CS                                                       | <b>Views about the format, content and delivery of interventions</b>                                       | 55,57,59,61-63                         |                                                                                                                                                                                                                                                                                                                                                                                                                     |
| Informed decision making too lengthy                                             |                                                                                                            |                                        |                                                                                                                                                                                                                                                                                                                                                                                                                     |
| Doctor's decision takes precedence                                               |                                                                                                            |                                        |                                                                                                                                                                                                                                                                                                                                                                                                                     |
| Decision-making process with women                                               |                                                                                                            |                                        |                                                                                                                                                                                                                                                                                                                                                                                                                     |
| Women's right to choose CS                                                       | <b>Beliefs about the clinical encounter and autonomous decision-making</b>                                 | 44-47,54-55,57-59,61-62,66             |                                                                                                                                                                                                                                                                                                                                                                                                                     |
| Informed decision making too lengthy                                             |                                                                                                            |                                        |                                                                                                                                                                                                                                                                                                                                                                                                                     |
| Doctor's decision takes precedence                                               |                                                                                                            |                                        |                                                                                                                                                                                                                                                                                                                                                                                                                     |
| Decision-making process with women                                               |                                                                                                            |                                        |                                                                                                                                                                                                                                                                                                                                                                                                                     |



## Box 1: Themes with supporting quotes

| Philosophy of birth                                                                                                                                                                                                                                                                                                                                                                                                                                                                                                                                                                                                                                                                                                                                                                                                                                                                                                                                                                                                                                                                                                                                                                                                                                                                                                                                                                                                                                                                                                                                                                                                                                                                                                                                                                                                                                                                                                                                                                                                                                                                                                                                                                                                                                                                                                                                                                                                                                                                                                                                                                                                                                                                                                                                                                                                                                                                                                                                                                                                                                                                                                                                                                                                                                                                                                                                                                                                                     |
|-----------------------------------------------------------------------------------------------------------------------------------------------------------------------------------------------------------------------------------------------------------------------------------------------------------------------------------------------------------------------------------------------------------------------------------------------------------------------------------------------------------------------------------------------------------------------------------------------------------------------------------------------------------------------------------------------------------------------------------------------------------------------------------------------------------------------------------------------------------------------------------------------------------------------------------------------------------------------------------------------------------------------------------------------------------------------------------------------------------------------------------------------------------------------------------------------------------------------------------------------------------------------------------------------------------------------------------------------------------------------------------------------------------------------------------------------------------------------------------------------------------------------------------------------------------------------------------------------------------------------------------------------------------------------------------------------------------------------------------------------------------------------------------------------------------------------------------------------------------------------------------------------------------------------------------------------------------------------------------------------------------------------------------------------------------------------------------------------------------------------------------------------------------------------------------------------------------------------------------------------------------------------------------------------------------------------------------------------------------------------------------------------------------------------------------------------------------------------------------------------------------------------------------------------------------------------------------------------------------------------------------------------------------------------------------------------------------------------------------------------------------------------------------------------------------------------------------------------------------------------------------------------------------------------------------------------------------------------------------------------------------------------------------------------------------------------------------------------------------------------------------------------------------------------------------------------------------------------------------------------------------------------------------------------------------------------------------------------------------------------------------------------------------------------------------------|
| <p>"If somebody says that a woman needs a caesarean our senior midwives are prepared to say 'why?' ... we're all working for the same thing' (Obstetrician, UK Marshall, 2016:337)</p> <p>"It's just kind of a personal philosophy, too. Otherwise you'd be too afraid to do anything." (CNM, USA, Cox 2011:5)</p> <p>"We have a 60 or 65% CSR, but we must not only focus on the percentage of caesareans, but also on the percentage of children admitted to the NICU; the perinatal mortality rate here is low (0–3 %)" (Nicaragua, Colomar 2014:2385)</p> <p>"With increase of caesarean section rate mortality of newborn and maternal mortality ratio remained low." (China, Liu 2010)</p> <p>"As a doctor I don't believe caesarean section is the best choice. Caesarean should be used as necessary." (China, Chen 2008)</p>                                                                                                                                                                                                                                                                                                                                                                                                                                                                                                                                                                                                                                                                                                                                                                                                                                                                                                                                                                                                                                                                                                                                                                                                                                                                                                                                                                                                                                                                                                                                                                                                                                                                                                                                                                                                                                                                                                                                                                                                                                                                                                                                                                                                                                                                                                                                                                                                                                                                                                                                                                                                   |
| <p>"... we used to deliver breeches [vaginally] and we no longer deliver breeches" (Doctor, UK, Kamal 2005:1056).</p> <p>"The mode of delivery in case of a breech presentation depends on the expertise of the obstetrician in attendance" (Midwife, The Netherlands, Melman 2017:5)</p> <p>"Maybe they [residents] say that it was 'fetal distress' but it was not fetal distress, it was 'doctor's distress' ... [laughter]" (Specialist, Tanzania, Litop 2015:235)</p> <p>"Residents who perform the job, decide in favor of CS as soon as even a small problem is encountered..." (Specialist, Iran, Yazdizadeh 2011:7)</p> <p>"Quality of care can put pressure on people to do what the clients want rather than what is clinical need" (Midwife, UK, Kamal 2005:1057)</p> <p>"The discrepancy between the midwives' and the specialists' information is our main problem. We don't believe in issues that the physicians accept as true" (Midwife, Iran, Yazdizadeh 2011)</p> <p>"Continuous CTG according to protocol is recommended. However, the difficulty with that is the risk for uterine rupture is 1:1000 and so very low...I am a little flexible in this." (Obstetrician, Netherlands, Lundgren 2015:6)</p> <p>"If the woman is nulliparous, pregnant with a child that is expected to be large for gestational age and with a fetal head not engaged at term, it depends on her characteristics whether or not I will discuss a CS" (Midwife, Melman 2017:3)</p> <p>"I went on and looked at CS rates throughout the country. And was quite disappointed to see how high some of them were really" (Midwife, UK, Kamal 2005:1055).</p> <p>"We started looking at some of the CS, why are we doing them, discussing them in meetings, and these CS weren't necessarily indicated." (Obstetrician); "I do think we've made good progress with it, but I think it would be complacent if we sat here to say ... there isn't more work to do, because there's always more work to do ... to keep developing and improving the service. You know, it's good today but tomorrow can be better..." (Head of Midwifery, UK, Marshall 2016:335)</p> <p>"Despite the reduced number of pregnancies, women undergo surgeries due to various other reasons in which the adhesions caused by previous C-sections might become troublesome." (Iran, Yazdizadeh 2011)</p>                                                                                                                                                                                                                                                                                                                                                                                                                                                                                                                                                                                                                                                                                                                                                                                                                                                                                                                                                                                                                                                          |
| Social and cultural context                                                                                                                                                                                                                                                                                                                                                                                                                                                                                                                                                                                                                                                                                                                                                                                                                                                                                                                                                                                                                                                                                                                                                                                                                                                                                                                                                                                                                                                                                                                                                                                                                                                                                                                                                                                                                                                                                                                                                                                                                                                                                                                                                                                                                                                                                                                                                                                                                                                                                                                                                                                                                                                                                                                                                                                                                                                                                                                                                                                                                                                                                                                                                                                                                                                                                                                                                                                                             |
| <p>"Obstetricians are in a constant fear of being sued, so they're taking a path of least resistance" (Doctor, USA, Cox 2011:5)</p> <p>"Your reputation is important. No one will give you a gold medal for a VBAC rate of 95 % if you make one mistake" (Ireland, Lundgren 2016:6)</p> <p>"I am coming towards retirement, I don't want to go to court" (Midwife, UK Kamal 2005:1058)</p> <p>"Our society has spent more time on teaching the process of suing rather than introducing the labor to the general public" (Midwife, Iran, Yazdizadeh 2011:5).</p> <p>"In the private sector, providers are reimbursed approximately \$700 for normal childbirth and \$1,500 for CS, so the doctor prefers to perform a CS" (Nicaragua, Colomar 2014:2388)</p> <p>"...Profit from CS surgery is much high than vaginal delivery" (Healthcare provider, China, Liu, 2010)</p> <p>"The main problem with natural delivery is its unpredictability, as it may occur anytime and disturb the physician's program" (Specialist, Iran, Yazdizadeh 2011:4)</p> <p>"People don't want to wait too long. Rather than waiting the whole night, they take a short-cut." (Consultant, Tanzania, Litop 2015:235).</p> <p>"We know that CS is not indicated in low-risk pregnancy, but to avoid the night pressure and the work during the night..." (Colomar 2014:2385)</p> <p>"Some of them (women), they just quite like a planned thing. They have the caesarean." (Midwife, Australia, Fourer 2017:6)</p> <p>"It is requested a lot (CS)" (Ob/Gyn physician, Nicaragua, Colomar 2014:2385)</p> <p>"In the end of the day, when they come to deliver, they are so weak, they cannot push the babies. So the patients themselves are the ones requesting for CS, because they cannot tolerate the labor pain" (Resident, Tanzania, Litop 2015:235).</p> <p>"...not following a healthy diet have reduced the capabilities of our girls in this regard [to undergo vaginal delivery]" (Physician, Iran, Yazdizadeh 2011:10)</p> <p>"Inadequate information to mothers makes them fear labouring!.." (Kenya, Wanyonyi 2010:338)</p> <p>Sometimes it is the mother's mother and her sister and all that out there [general agreement]. I am afraid, I am reading this. And it is the Internet, its Dr Google" (Ireland, Lundgren 2016:6)</p> <p>"You can never ignore the information a patient receives from a neighbour or a niece. That sometimes seems more important than the medical information you provide" (Netherlands, Melman 2017:5)</p> <p>"You might enter into a situation of decision of unnecessary CS because of the, you know, friction with the midwives" (Resident, Tanzania, Litop 2015:236)</p> <p>"In our hospital, the residents are not allowed to independently consult the anaesthesiologist at night" (Resident, The Netherlands, Melman 2017:5)</p> <p>"The GP is vital... If the GP will support you, then you are in business" (Obstetrician, Ireland, Lundgren 2016:4)</p> <p>"There is a little more work to be done in primary care, with nursing assistants, with social workers... to create a little awareness of what a vaginal delivery is" (Nicaragua, Colomar 2014:2388)</p> <p>"There is no joint meeting between the midwifery and obstetricians associations." (Midwife, Iran, Yazdizadeh 2011:9)</p> <p>"Then the ACOG shift happened... So we had to stop doing them [VBACs]" (CNM, USA, Cox 2011:7)</p> |
| Negotiation within the system                                                                                                                                                                                                                                                                                                                                                                                                                                                                                                                                                                                                                                                                                                                                                                                                                                                                                                                                                                                                                                                                                                                                                                                                                                                                                                                                                                                                                                                                                                                                                                                                                                                                                                                                                                                                                                                                                                                                                                                                                                                                                                                                                                                                                                                                                                                                                                                                                                                                                                                                                                                                                                                                                                                                                                                                                                                                                                                                                                                                                                                                                                                                                                                                                                                                                                                                                                                                           |
| <p>"In our hospital improved support during labour could reduce CS rates. However, we know upfront that an increase in staffing is not an option" (The Netherlands, Melman 2017:6)</p> <p>"Nobody can tell what will happen during a trial of labour (TOL), so we should say that a TOL is possible, but only if we have staff who are not overworked and exhausted." (Italy, Lundgren 2016:5)</p> <p>"It is not possible to promote physiologic delivery without spending on it" (Midwife, Iran, Yazdizadeh, 2011:9)</p> <p>"We cannot monitor the foetus continuously...why try a scar" (East Africa, Wanyonyi, 2010)</p> <p>"If the patient is given enough time, she may have a normal delivery, but as the risk of a uterus rupture is present during labor and we need a blood bank available, we perform an elective surgery" (Ob/Gyn physician, Colomar 2014:2385)</p> <p>"Not everybody needs to be on CTGs and that they don't need to be on beds and stuff like that..." (Midwife, UK, Marshall 2016)</p>                                                                                                                                                                                                                                                                                                                                                                                                                                                                                                                                                                                                                                                                                                                                                                                                                                                                                                                                                                                                                                                                                                                                                                                                                                                                                                                                                                                                                                                                                                                                                                                                                                                                                                                                                                                                                                                                                                                                                                                                                                                                                                                                                                                                                                                                                                                                                                                                                    |

1  
2  
3  
4  
5  
6  
7  
8  
9  
10  
11  
12  
13  
14  
15  
16  
17  
18  
19  
20  
21  
22  
23  
24  
25  
26  
27  
28  
29  
30  
31  
32  
33  
34  
35  
36  
37  
38  
39  
40  
41  
42  
43  
44  
45  
46  
47  
48  
49  
50  
51  
52  
53  
54  
55  
56  
57  
58  
59  
60

"In the past few years many obstetricians have never had the opportunity to do a vaginal delivery"; "If you ask any of the midwives in our hospital, they attest that they have not conducted a natural delivery for years" (Specialists and Hospital Director, Iran, Yazdiadeh 2011:4)

"Nowadays we can see how the culture has affected the training of residents [junior obstetricians]. For residents, a previous CS means another CS. They have to be told that a woman can have a VBAC" (Italy, Lundgren 201:5)

"I think we should realize that we are the ones who have done them that way" [trained residents in hierarchical structures where admonishment has made them reluctant to seek a second opinion] (Specialist, Tanzania, Litorp 2015:235).

"The Toolkit was not dictatorial in nature but rather it enabled the team to decide "where as an organisation you wanted to be" (Midwife); "...everybody had a greater awareness; consultants, registrars, SHOs, ultrasonographers, student midwives, student nurses, anaesthetists even came [to the meetings]. ... they all bring a different perspective, and they also take credibility back to their own peer group." (Midwifery Manager, UK, Marshall 2016:337)

Non-responsible personnel such as the head of the network and health officials in small provinces force young specialists to stay away from C-section" (Specialist, Iran, Yazdizadeh 2011:4)

"...A trial of labour should be offered to a woman with one previous transverse low-segment caesarean section. The use of conditional verb tense in the guideline has been identified as a potential barrier to adopting the recommendations, refusing any sort of obligation." (Chaillet 2007:794)

"Developmental" or "pilot" project, and inviting rather than mandating participation (Dunn 2013:311)

"I'll do it [CS]! Because she has already decided! Or she will go to someone else" (Specialist, Tanzania, Litorp, 2015:235)

"That's about the same thing as if I decide how the plumber should place the pipes in my home, or if I should go on a long holiday abroad and beforehand go to the surgeon and say, can I have my appendix removed so I don't get sick?" (Midwife, Sweden, Lundgren, 2015:6)

"I am very good at telling people what they don't want, what they can't have. What they mustn't expect. I'm damned if I let somebody come and say, 'I'm going to have something this way' unless they are prepared to pay for it" (Midwife, UK, Kamal 2005:1058)

"We need time to be able to approach the patients [to talk about Labour and vaginal birth], and what we have in this hospital is lack of time; we are so overloaded that we usually give only 15 min per patient" (Physician, Nicaragua, Colomar 2014:2388)

"Time is a factor. But we have a "Towards Normal Birth" midwife who is [very available] to us" (Midwife, Australia, Fourer 2017:6)



## Theme 1: Philosophy of birth

This theme encapsulates how the philosophy of birth expressed by both individuals and teams acts as a guiding principle underpinning the value health professionals' attach to CS reduction, and, therefore, to interventions designed for this purpose. Underpinning beliefs about birth play out in everyday clinical practice, including which caesareans, if any, health professionals view as unnecessary; how available evidence is used; and receptiveness, or not to change.

**Beliefs about birth.** Across 13 studies[44-46,54,57-62,64-66] from 14 countries, varying beliefs about birth were reported. An inter-disciplinary, cross-system shared belief in vaginal birth was a key mechanism to facilitating a common approach that could help women deliver vaginally, as typified by a midwife from the Netherlands: "*it is very clear that the hospitals we work with are also very much advocates of VBAC in the same way we are.*"[64:p.4] In contrast, a specialist from Iran, where the CS rate was in excess of 40%, said "*The general belief indicates that caesarean is better than vaginal delivery. The dominant paradigm says so.*"[57:p.4] Some health professionals in the review valued labour and vaginal birth as a physiological process. Others believed that labour and birth in general, or VBAC in particular, comes "*with the big-risk of a very-bad outcome.*"[65:p.4] These individuals thought CS was a reasonable solution for many if not most women, even if they had some doubts about the safety of the operation.

**Beliefs about what constitutes necessary and unnecessary CS and beliefs about the evidence.** There was ambiguity surrounding what health professionals believe constitutes a definite clinical indication for CS. This varied across time (e.g. changing views about the need for CS for breech presentation); place (the extent to which CS was available and accessible locally); or clinical history (i.e. whether women with a previous CS should or should not have a repeat operation in a subsequent pregnancy).[47,54-57,63] Health professionals chose the evidence they used to support their position.[47,54-57,59-61,64-65] Evidence could provide an impetus for change, but not where it was viewed as incomplete, unconvincing or inapplicable.[59,61] In Nicaragua, for instance, specific concerns were expressed about the relevance of available evidence because "*Studies have shown that VBAC*

1  
2  
3 *is a good option, but these studies have been done in developed countries where*  
4 *educated people space their pregnancies*’[61:p2385] The absence of very local  
5 evidence was used as a rationale for resisting change: “*The truth is that we don’t*  
6 *have statistics of CS complications that might negatively influence the decision to*  
7 *perform a CS, like fatal-deadly outcomes or anything like that.*”[61:p.2388]  
9

### 12 **Belief in the need to reduce unnecessary CS, and receptiveness to change.**

13  
14 Across resource settings, some health professionals’[54-55,57-59,61-64]  
15 acknowledged that some CSs “*weren’t necessarily indicated*”[62:p.334] and CS rates  
16 were in general too high.[54] Participants from Iran and Tanzania raised specific  
17 concerns about “*whether CS on demand in private patients should be considered*  
18 *malpractice*”[63:p.235] and that “*physicians should respect ethical rules*”[57:p.6],  
19 rather than acceding to patient demand. Positive attitudes towards continuing  
20 professional education and development were important to reintroducing belief in  
21 vaginal birth. “*We are strengthened by watching how happy the patients are when it*  
22 *works, and we have the experience of how excellently women give birth, so we are*  
23 *strengthened by this [experience] in our care of all the other [women].*”[64:p.7] Health  
24 professionals from organisations that achieved success in reducing rates of CS  
25 worked in cultures that valued clinical audit, second opinion and/or continuing  
26 medical education as part of continuous quality improvement.[59,62] As this Head of  
27 Midwifery in UK said “*we knew we had a problem, we knew what the issues were,*  
28 *actually addressing them was the challenge for us.*” [62:p.337]  
29  
30  
31  
32  
33  
34  
35  
36  
37  
38  
39  
40  
41

### 42 **Theme 2: Social and cultural context (5 SoFs)**

43  
44 The second theme explores how social and cultural context exerts an important  
45 influence on health professional’s commitment to reducing CS, or not. Resistance  
46 was influenced by fear of blame and recrimination, including fear of litigation for not  
47 intervening; the value attached to personal financial rewards associated with CS;  
48 and preference for CS as a convenient, efficient birth method that can be scheduled.  
49 This was contextualised by shifting beliefs about the inherent capacity or not of  
50 women to give birth safely if left to labour without technical intervention, and the  
51  
52  
53  
54  
55  
56  
57  
58  
59  
60

1  
2  
3 strength of professional teamwork in local contexts and as advocated in national  
4 guidelines.  
5

6  
7  
8 **Fear of blame and recrimination.** In eight studies[45,54-55,57-58,61,63-64] health  
9 professionals reported feelings of fear associated with the risk of poor perinatal  
10 outcomes following vaginal delivery, threats to their professional identity arising from  
11 seeking a second-opinion, and a general fear of litigation. They acknowledged that  
12 these prompted the early clinical decision to default to CS,[55,57,58,61] as evident in  
13 this quote from a Nicaraguan specialist: “[*The number one priority... is the fear of*  
14 *medico-legal problems because we didn't do a cesarean section.*”[61:p.2385] Within  
15 studies, resistance to defensive practice was also reported: “*I just think it's a bunch*  
16 *of crap that you have to change your practice when you know something is safe*  
17 *because somebody might sue you*”(USA midwife).[58:5] Across most studies the  
18 extent of actual experience of a lawsuit was unclear. In a study from Tanzania,  
19 where fear of litigation was given as a rationale for medically unjustified CSs, no  
20 participant had personal experience of being sued.[63] It seemed that the practice  
21 was more about defending against such a situation ever arising in the future: “*If the*  
22 *woman went to CS and she comes out safe and the baby is safe, there is no very big*  
23 *harm in that. Despite that the indication was not appropriate... It is not so bad*  
24 *compared to if CS was supposed to be done and it was not done in time.*” [63:p236]  
25  
26  
27  
28  
29  
30  
31  
32  
33  
34  
35  
36

37 **Value attached to financial rewards associated with CS.** Some health  
38 professionals were outspoken about the economic incentives for CS, perceiving  
39 some practices to be tantamount to “*selling caesareans.*”[58:p6] While some doctors  
40 considered CS involved more work, justifying greater payment, others blamed  
41 financial incentives for CS, while others were open about valuing the extra income  
42 provided by undertaking CS.[45,47,55,57-58,60-61,63] There were critical comments  
43 from both doctors and midwives relating to insufficient income for the time spent with  
44 labouring women, and for vaginal birth, by comparison to the time needed and  
45 financial rewards for undertaking CS. In Iran, it was suggested that the “*the paying*  
46 *system should be changed completely. Paying physicians a definite salary rather*  
47 *than based on the number of cases they visit, would change the condition*  
48 *significantly.*”[57:p4] However, another specialist in the same study said “*I won't do it*  
49 *(vaginal delivery), even if I'm paid 10 times more.*” [57:p.4] The balance of financial  
50  
51  
52  
53  
54  
55  
56  
57  
58  
59  
60

1  
2  
3 reward with the convenience of the operation isn't clear, but favourable attitudes to  
4 these two factors were linked in several studies[57-58,60-61,63] as evident in this  
5 quote "*with CS I minimize my time and I earn more!*"[63:p.235]  
6  
7

8  
9 **Preferences for CS as convenient.** In seven studies[46,57-61,63] health  
10 professionals noted the convenience of CS compared to vaginal birth. For women  
11 with a previous CS, one community obstetrician in the USA said "*it's easier to do a*  
12 *repeat C-section*"[58:p6] while another community obstetrician in the same study  
13 suggested "*it's much easier for us to schedule a C-section, but if it's [VBAC]*  
14 *something that the patient wants, then we certainly give them that*  
15 *opportunity.*"[58:p6] In Iran, Nicaragua, and Tanzania the use of CS to avoid night  
16 pressures was acknowledged.[57,61,63] One Iranian specialist was disinclined to  
17 "*revisit my patient in the hospital at 10 pm to carry out a vaginal delivery.*"[57:p.4] In  
18 Nicaragua, another overburdened local-level provider said "*We know that cesarean*  
19 *section is not indicated in low-risk pregnancy, but to avoid the night pressure and the*  
20 *work during the night.*"[61:p.2385] Some health professionals believed that CS was  
21 more convenient for women, describing the availability of extended family support  
22 during birth, father's work schedule, and dates of deployment overseas for military  
23 families.[59]  
24  
25  
26  
27  
28  
29  
30  
31  
32  
33  
34

35 **Beliefs about women.** In 15 studies health professionals talked about women as  
36 key to rising CS rates for psychological, physiological and social reasons.[45-47,54-  
37 61,63-66] Health professionals believed women are now less prepared for labour,  
38 less confident in their capacity to give birth vaginally, and more likely to demand a  
39 CS due to inadequate antenatal education, increasing fear of vaginal birth, and  
40 decreasing tolerance of labour pain, coupled with increasing rates of obesity,  
41 sedentary lifestyles and "*western diseases.*"[63:p.235] There was also the  
42 suggestion "*C-section is becoming more common and stylish these days.*"[57:p.11]  
43 What women want and why was perceived to be influenced by family and friends,  
44 the media, and interactions with (other) health professionals.  
45  
46  
47  
48  
49  
50  
51  
52

53 **Dysfunctional teamwork within the medical profession and the marginalization**  
54 **of midwives.** Unsupportive medical hierarchies, communication barriers, and  
55 difficult relationships between specialists and residents, and midwives and doctors  
56  
57  
58  
59  
60

1  
2  
3 were perceived as contributing to high CS rates in all settings.[47,55-63,65] In  
4 Ireland, support from the family doctor (GP) from the outset of a woman's pregnancy  
5 was reported as crucial to the outcome of trial of VBAC: "*If the GP will support you,*  
6 *then you are in business*".[65:p.4] In Iran and the USA midwives and obstetricians  
7 spoke passionately about the marginalization of midwives and, about the  
8 counterproductive effect of their exclusion from guideline creation[57] and  
9 content.[58] Midwives and residents mentioned the presence of strict hierarchies as  
10 troublesome barriers to optimal care for women.[47,57,63] Where these strong  
11 hierarchical structures existed, and in contexts where junior medical staff expected  
12 to be scolded for unnecessary questions or for mistakes, specialists acknowledged  
13 that juniors were reluctant to seek their opinion.[63]  
14  
15  
16  
17  
18  
19  
20  
21

### 22 **Theme 3: Negotiation within the system (5 SoFs)**

23  
24 The third theme captures how health professionals actively negotiate care within the  
25 health system, and how this impacts on the effectiveness of interventions to reduce  
26 unnecessary CS.  
27  
28  
29

30  
31 **Organisation of care.** From all resource settings, health professionals expressed  
32 concerns that the current organisation of care in their country was insufficiently  
33 resourced.[47,55-59,61-63,65] In LICs, peripheral hospitals were described as  
34 overcrowded, under-equipped, and under-staffed,[63] with not enough nurses or  
35 midwives to care for women during labour.[56] In MICs, CS was acknowledged as a  
36 way to compensate for insufficient time for antenatal counselling, lack of emergency  
37 care,[61] lack of labour facilities or a lack of midwives,[57] as well as being  
38 convenient for physicians and a valued source of revenue for individuals or  
39 facilities.[57,61] Short appointments limiting the time available to discuss birth  
40 options and build a trusting relationship were reported in HICs,[66] and inadequate  
41 postnatal debriefing after a woman's first CS was believed to be associated with  
42 maternal choice for repeat CS.[54] However, while staff shortages were reported in  
43 HICs,[47,62] changes to the organisational culture of caring in the UK were reported  
44 to address CS rates without additional resource.[62]  
45  
46  
47  
48  
49  
50  
51  
52  
53  
54  
55  
56  
57  
58  
59  
60

1  
2  
3 **Beliefs about the need for high-level infrastructures.** In 14 studies health  
4 professionals talked about the infrastructure required to provide safe care during  
5 labour and vaginal birth in general, and VBAC in particular.[47,54-66] The need for  
6 modern user-friendly equipment in hospitals was a recurrent concern in LICs.[56,63]  
7 In HICs all of the hospitals in one study reported using professional guidelines  
8 (ACOG) as the defining standard of care for VBAC.[58] Professionals in the hospitals  
9 talked about how the mundane details of operationalising specific aspects of care  
10 made the difference between whether or not VBAC was actually achievable.  
11 Immediately available access to senior staff skilled in the provision of emergency  
12 care in one hospital meant “*we cannot leave the facility*”; in another “*within 10*  
13 *minutes from the unit [labour and delivery]*”; and another no “*dedicated anaesthesia*  
14 *provider for L&D [labor and delivery]*” meant “*we’re not able to offer a VBAC.*”[58:p6]  
15  
16  
17  
18  
19  
20  
21  
22  
23

24 **Training, skills and experience.** Reluctance on the part of some professionals to  
25 implement guidelines or programmes targeted at them to reduce CS stemmed from  
26 insufficient training and experience, or past experience of a bad outcome.[45,47,55-  
27 57,59,61,65-66] Concerns were voiced about the younger generation of health  
28 professionals (residents and midwives) who were felt to be ill-equipped with the  
29 requisite skills in labour and vaginal birth.[57,61,65] In an Iranian study “*residents*  
30 *learn[t] the process of natural delivery during the first year but by the time they have*  
31 *learned how to deal with physiologic labor, the year ends and a new unskilled group*  
32 *becomes responsible for the whole thing*” and “*Many first year residents transfer*  
33 *mothers from labor rooms for a C-section as they need to learn C-section before*  
34 *entering the second year.*”[57:p7] The importance of training in labour and vaginal  
35 birth before professional accreditation and continued professional development was  
36 evident. In two Canadian studies, obstetricians identified the importance of  
37 *educational workshops focusing on the recommendations in practice to make the*  
38 *guidelines more acceptable and useful to health professionals.*[55:p795]  
39  
40  
41  
42  
43  
44  
45  
46  
47  
48  
49

50 **Views about the format, content and delivery of interventions.**[55,57,59,61-63]  
51 Health professional *buy-in* was a process that had to be continuously  
52 negotiated,[59,62] without fear of blame or threat to professional identity.[62,63]  
53 Health professionals also wanted the tone of guidance to be reflective, rather than  
54 dictatorial. Language mattered, in particular avoiding words such as ‘should’,  
55  
56  
57  
58  
59  
60



1  
2  
3 'developmental' or 'pilot.'[59] Some health professionals described how important it  
4 was for local opinion leaders to personally endorse projects.  
5  
6

7  
8 **Beliefs about the clinical encounter and autonomous decision-making.**[44-  
9 47,54-55,57-59,61-62,66] Organisations that accept CS on maternal request have  
10 higher CS rates.[62] Some health professionals reported that a woman's preference  
11 for a CS greatly influenced their clinical-decision making.[45,61] In one study of three  
12 countries with high VBAC rates it was believed that, while women should participate  
13 in decision-making, only professionals can make the final decision, based on medical  
14 knowledge.[64] Where teams had a shared approach to the clinical encounter,  
15 informed decision-making was more likely to happen irrespective of who made the  
16 final decision, and everyone involved was reassured by the process. This required  
17 time.  
18  
19  
20  
21  
22  
23  
24  
25  
26  
27

## 28 **Line of argument synthesis**

29  
30 Health professionals' accounts revealed the synergy between their underpinning  
31 philosophy of birth (as inherently normal or pathological), their social and cultural  
32 context, and the extent to which they were enabled and prepared to negotiate within  
33 the local health and cultural system context and resources to reduce CS rates.  
34 These values and preferences influenced their receptiveness to interventions and,  
35 potentially, the effectiveness of the intervention itself. Supplementary file 6  
36 represents this in a figure. The mechanisms of effect for change or resistance to  
37 change appeared to include prior beliefs; willingness or not to engage with change,  
38 especially where this entailed potential loss of income or status including the risk of  
39 litigation; and capacity or not to influence local community and health care norms  
40 and values relating to CS provision.  
41  
42  
43  
44  
45  
46  
47  
48  
49  
50

## 51 **DISCUSSION**

52  
53 This qualitative evidence synthesis identified fourteen Summary of Findings,  
54 resulting in three core themes: *Philosophy of birth* (4 SoFs); 2) *Social and cultural*  
55  
56  
57

1  
2  
3 *context* (5 SoFs); and 3) *Negotiation within system* (5 SoFs). The consequent line of  
4 argument was supported by the peripheral literature,[41,67-81] and includes three  
5 potential mechanisms of effect for change. These are: *prior beliefs about whether*  
6 *labour and birth are fundamentally physiological or pathological; willingness or not to*  
7 *engage with changing local practice norms, especially where this entails potential*  
8 *loss of income or status; and capacity or not to influence local community and health*  
9 *care systems and structures relating to maternity care provision.*  
10  
11  
12  
13  
14  
15

### 16 **Strengths and weaknesses of the study**

17 To the best of our knowledge this is the first global qualitative evidence synthesis that  
18 addresses health professional's views of specific interventions targeted at them to  
19 reduce unnecessary CS. Our search strategy is likely to have captured all relevant  
20 studies published in the time period we covered. The findings included the views and  
21 experiences of obstetricians, midwives, and general practitioners from high, middle  
22 and low income countries, and countries with both high and low rates of caesarean  
23 section. Quality scores for included studies were generally high or moderate. There  
24 was high or moderate confidence on the CERQual measure for 11 Summaries of  
25 Findings. However, we only had data from one Asian country (China), one Middle  
26 Eastern country (Iran) and one South American country (Nicaragua). All of these  
27 regions have very high rates of CS.  
28  
29  
30  
31  
32  
33  
34  
35  
36

### 37 **Strengths and weaknesses in relation to other studies**

38 In comparison to surveys of health professional practice, our qualitative review  
39 provides more nuanced explanations for why interventions designed to change  
40 health professionals practice may or may not work. For instance, a survey  
41 associated with a cluster RCT of Brazilian doctors' perspective on seeking a second  
42 opinion strategy before undertaking CS found that around half of the participants  
43 thought the strategy might be effective locally, though far fewer thought this would be  
44 the case in private as opposed to public hospitals.[53] Our review reinforces this  
45 finding, but also provides more detailed insights into why this situation might occur,  
46 since it shows that seeking a second opinion brings fear of recrimination that could  
47 undermine professional identities and career progression, and it threatens loss of  
48 income, challenges power structures, and risks exposing over-use of CS for financial  
49 gain. Our review also resonates with the findings of studies that interpret maternity  
50  
51  
52  
53  
54  
55  
56  
57  
58  
59  
60



1  
2  
3 cultures as being the outcome of social processes and practices, exposing the  
4 disjuncture between what is supposed to happen and what actually happens when  
5 national and international policy measures are implemented in local contexts.[48,83-  
6 84] Our review further identifies the degree to which health professionals manipulate  
7 the kind of evidence they use to reinforce their arguments for or against action on  
8 high CS rates.[82] This indicates that beliefs and values are the key arbiter of  
9 intention to change behaviour, regardless of the wider system pressures, and despite  
10 knowledge of the evidence base.[82,84-85] Our findings therefore reinforce  
11 arguments that simply providing good quality evidence to health care providers will  
12 not influence practice change.  
13  
14  
15  
16  
17  
18  
19

### 20 21 **Implications for clinicians and policy makers**

22 The three mechanisms of effect we have identified are aligned with the three key  
23 domains of general behavioural change theory.[86-87] This theory has a number of  
24 forms, but in general, it can be summarised as *'my behaviour depends on what I*  
25 *believe is right to do; what is normal to do around here; and what is under my control*  
26 *to do'*. Changing the behaviours of health professionals and policy makers therefore  
27 demands action in these three areas. First, health professionals need to believe that  
28 they, personally, are performing unnecessary CS, and that physiological labour and  
29 vaginal birth has an intrinsic value. Second, health care providers need to be brought  
30 together in intra and interprofessional groups, to discuss and agree how to change  
31 local norms about practice decisions in various labour and birth scenarios. This may  
32 include development of skills in self-reflection, and targeted continuing professional  
33 education (CPD). Third, health professionals need to be enabled within their  
34 healthcare system, to address barriers that include the relative status and power of  
35 various professional groups, the quality (or not) of clinician-patient relationships,  
36 medico-legal concerns, monetary gain, and efficiency concerns. Evidence of the  
37 impact of changes in these three areas is currently emerging in China.[88]  
38  
39  
40  
41  
42  
43  
44  
45  
46  
47  
48  
49

### 50 51 **Unanswered questions and future research**

52 The potential mechanisms of effect arising from this study should be integrated with  
53 the findings from qualitative evidence synthesis reviews of the views and  
54 experiences of women and communities[89] and of those working at the level of  
55 organisations, facilities and systems.[90] The integrated mechanisms of effect should  
56  
57  
58  
59  
60

1  
2  
3 then be used to design implementation interventions to reduce the overuse of CS,  
4 based on participative and action orientated research designs that involve all  
5 relevant stakeholders, and that take account of local context. In settings where there  
6 are rapidly rising CS rates, and where there was lower confidence for the summaries  
7 of findings in this review (such as South Asia and South America) further in-depth  
8 qualitative studies are needed to establish how far our findings are applicable locally,  
9 before intervention programmes are introduced in such settings.  
10  
11  
12  
13  
14

## 15 **CONCLUSION**

16 Change programmes for health professionals need to act on personal beliefs, local  
17 norms, and control beliefs to be effective. This review provides detailed insights into  
18 the particular factors that enhance or resist reduction in unnecessary CS from the  
19 point of view of health professionals in low, middle and high income countries from  
20 around the world, including those with both very low and very high rates of CS. For  
21 maternity care professionals, there is a synergistic relationship between their  
22 underpinning philosophy of birth, the social and cultural context they are working  
23 within, and the extent to which they are prepared and able to negotiate changes to  
24 health system structures and resources. To maximise the chance of success, the  
25 proposed mechanisms of effect resulting from this study, and from parallel reviews of  
26 the views and experiences of service users and of those working at the level of  
27 organisations, facilities, and systems, should be built in to future change  
28 programmes designed to reduce unnecessary CS.  
29  
30  
31  
32  
33  
34  
35  
36  
37  
38  
39  
40  
41

## 42 **Figure legends**

43 Figure 1: PRISMA Diagram

44 Figure 2: (Supplementary file): Thematic schema depicting influence of health  
45 professionals' values and beliefs on intervention effectiveness  
46  
47  
48  
49  
50

51 **Author contributions:** APB and CK designed the review with input from SD. CK  
52 and SD conducted the searches, identification and screening with agreement by  
53 consensus of all authors on final inclusions. CK extracted data, with CK and SD  
54  
55  
56  
57

1  
2  
3 agreeing initial, emergent and final themes. CK, SD and APB all contributed to  
4 writing the paper. All authors read and approved the final manuscript.  
5  
6  
7

8 **Data sharing statement:** This is a qualitative evidence synthesis. Original research  
9 data is contained in the included studies. Data interpretation is contained in the  
10 manuscript. Further information can be obtained from the corresponding author.  
11  
12  
13

14 **Acknowledgements:** Qian Long for her native-tongue translation and interpretation  
15 of Chinese papers into English language. Newton Opiyo for his contributions to  
16 enhance the synergy between this qualitative evidence synthesis and the Cochrane  
17 Review of Non-clinical interventions to reduce unnecessary caesarean section.  
18 Meghan Bohren for continuing support and discussion about qualitative evidence  
19 synthesis and the GRADE-CERQual method for assessing confidence in findings.  
20  
21  
22  
23  
24  
25

## 26 **References**

- 27 1. World Health Organization. WHO Statement on Caesarean Section Rates.  
28 WHO/RHR/15.02; 2015.
- 29 2. Lumbiganon P, Laopaiboon M, Gulmezoglu AM, Souza JP, Taneepanichskul S, Ruyan  
30 P, et al. Method of delivery and pregnancy outcomes in Asia: the WHO global survey on  
31 maternal and perinatal health 2007–08. *Lancet* 2010;375:490–9.
- 32 3. Souza JP, Gulmezoglu A, Lumbiganon P, Laopaiboon M, Carroli G, Fawole B, et al.  
33 Caesarean section without medical indications is associated with an increased risk of  
34 adverse short-term maternal outcomes: the 2004–2008 WHO Global Survey on  
35 Maternal and Perinatal Health. *BMC medicine* 2010;8:71.
- 36 4. World Health Organisation. Appropriate technology for birth. *Lancet* .1985
- 37 5. Betran AP, Ye J, Moller AB, Zhang J, Gülmezoglu AM, Torloni MR. The increasing trend  
38 in caesarean section rates: Global, regional and national estimates: 1990-2014. *PLoS*  
39 *One* 2016;11(2): e0148343.
- 40 6. Leal MdC. Nascer no Brasil: Inquerito Nacional sobre Parto e Nascimento. 2014.
- 41 7. Boatin AA, Schlottheuber A, Betran AP, Moller AB, Barros AJD, Boerma T, Torloni MR,  
42 Victora CG, Hosseinpoor AR. Within country inequalities in caesarean section rates:  
43 observational study of 72 low and middle income countries. *BMJ* 2018;Jan 24;360:k55.
- 44 8. <https://www.bmj.com/too-much-medicine> accessed 27th June 2018.
- 45 9. <http://www.choosingwisely.org/> accessed 27<sup>th</sup> June 2018.
- 46 10. Miller S, Abalos E, Chamillard M, Ciapponi A, Colaci D, Comandé D, Diaz V, Geller S,  
47 Hanson C, Langer A, Manuelli V, Millar K, Morhason-Bello I, Castro CP, Pileggi VN,  
48 Robinson N, Skaer M, Souza JP, Vogel JP, Althabe F. Beyond too little, too late and  
49 too much, too soon: a pathway towards evidence-based, respectful maternity care  
50 worldwide. *Lancet* 2016;388:2176–92.  
51  
52  
53  
54  
55  
56  
57  
58  
59  
60

11. Eshaug AG, Rosenthal MB, Lavis JN, Brownlee S, Schmidt H, Nagpal S, Littlejohns P, Srivastava D, Tunis S, Saini V. Levers for addressing medical underuse and overuse: achieving high-value health care. *Lancet* 2017;390:191-202
12. Johanson R, Newburn M, Mcfarlane A. Has the medicalisation of childbirth gone too far? *BMJ* 2002;324:892.
13. Robson MS. Classification of caesarean sections. *Fetal and Maternal Medicine Review* 2001;12(1):23-39.
14. Pyykönen A, Gissler M, Løkkegaard E, Bergholt T, Rasmussen SC, Smáráson A, Bjarnadóttir RI, Másdóttir BB, Kállén K, Klungsoyr K, Albrechtsen S, Skjeldestad FE, Tapper AM. Cesarean section trends in the Nordic Countries - a comparative analysis with the Robson classification. *Acta Obstet Gynecol Scand* 2017;96(5):607-616.
15. Vogel JP, Betran AP, Vindevoghel N, Souza JP, Torloni MR, Zhang J, Tunçalp O, Mori R, Morisaki N, Ortiz-Panoso E et al: Use of the Robson classification to assess caesarean section trends in 21 countries: a secondary analysis of two WHO multicountry surveys. *The Lancet Global health* 2015;3(5):e260-270.
16. Torloni MR, Betrán AP, Montilla P, Scolaro E, Seuc A, Mazzoni A, Althabe F, Merzagora F, Donzelli GP, Meriardi M. Do Italian women prefer cesarean section? Results from a survey on mode of delivery preferences. *BMC Pregnancy Childbirth* 2013;13:78.
17. Bettes BA, Coleman VH, Zinberg S, Spong CY, Portnoy B, DeVoto E, Schulkin J. Cesarean delivery on maternal request: obstetrician-gynecologists' knowledge, perception, and practice patterns. *Obstet Gynecol* 2007;109(1):57-66.
18. Munro S, Kornelsen J, Corbett K, Wilcox E, Bansback N, Janssen P. Do Women Have a Choice? Care Providers' and Decision Makers' Perspectives on Barriers to Access of Health Services for Birth after a Previous Cesarean. *Birth* 2017;44(2):153-160.
19. Sharpe AN, Waring GJ, Rees J, McGarry K, Hinshaw K. Cesarean section at maternal request: the differing views of patients and healthcare professionals: a questionnaire based study. *Eur J Obstet Gynecol Reprod Biol* 2015;192:54-60
20. Gabbe GS, Holzman GB. Obstetricians' choice of delivery. *Lancet* 2001;357:722
21. Jacquemyn Y, Ahankour F, Martens G. Flemish obstetricians' personal preference regarding mode of delivery and attitude towards caesarean section on demand. *Eur J Obstet Gynecol Reprod Biol* 2003;111:164-6.
22. Backe B, Salvesen KA, Sviggum O. Norwegian obstetrician prefer vaginal route of delivery. *Lancet* 2002;359:629.
23. Does van der J, Roosmalen van J. Obstetricians' choice of delivery. *Eur J Obstet Gynaecol Reprod Biol* 2001;99:139
24. Lavender T, Kingdon C, Hart A, Gyte G, Gabbay MB, Neilson JP. Could a randomised trial answer the controversy relating to elective caesarean section? National survey of consultant obstetricians and heads of midwifery. *BMJ* 2005;331: 490-491.
25. Habiba M, Kaminiski M, Da Fre M, Marsal K, Bleker O, Librero J, Granjean H, Gratia P, Guaschino S, Heyl W, Taylor D, Cuttini M. Cesarean section on request: a comparison of obstetricians' attitudes in eight European countries. *BJOG* 2006;113(6):647-656.
26. Grytten J, Skau I, Sorensen R. The impact of the mass media on obstetricians' behavior in Norway. *Health Policy* 2017;121(9): 986-93.
27. Localio AR, Lawthers AG, Bengtson JM, et al. Relationship between malpractice claims and cesarean delivery. *JAMA* 1993;269(3):366-73.
28. Khunpradit S, Tavender E, Lumbiganon P, Laopaiboon M, Wasiak J, Gruen RL. Non-clinical interventions for reducing unnecessary caesarean section. *Cochrane Database of Systematic Reviews* 2011, Issue 6. Art. No.: CD005528. DOI: 10.1002/14651858.CD

- 1
- 2
- 3 29. Chen I, Opiyo N, Tavender E, Mortaz-Hejri S, Rader T, Petkovic J, Yogasingam S,
- 4 Taljaard M, Aggarwal S, Wasiak J, Lumbiganon P, Gruen RL, Khunpradit S, Laopaiboon
- 5 M, Grimshaw J, Betran AP. Non-clinical interventions for reducing unnecessary
- 6 caesarean section. *Cochrane Review Update* (Forthcoming)
- 7
- 8 30. Noblit GW, Hare RD. *Meta-ethnography: Synthesizing Qualitative Studies*. 1st ed.
- 9 Thousand Oaks, California: Sage Publications; 1988.
- 10
- 11 31. Kingdon C, Downe S, Betrán AP. The use of interventions to reduce unnecessary
- 12 caesarean sections targeted at healthcare professionals: a qualitative evidence
- 13 synthesis. *PROSPERO 2017 CRD42017059455*
- 14
- 15 32. Moher D, Liberati A, Tetzlaff J, Altman DG, The PRISMA Group (2009). Preferred
- 16 Reporting Items for Systematic Reviews and Meta-Analyses: The PRISMA Statement.
- 17 *PLoS Med* 6(7): e1000097. doi:10.1371/journal.pmed1000097
- 18
- 19 33. Noyes J, Hannes K, Booth A, Harris J, Harden A, Popay J, Pearson A, Cargo M, and
- 20 Pantoja T on behalf of the Cochrane Qualitative and Implementation Methods Group.
- 21 Chapter 20: Qualitative research and Cochrane reviews. In: Higgins JPT, Green S
- 22 (editors), *Cochrane Handbook for Systematic Reviews of Interventions Version 5.3.0*
- 23 (updated October 2015). The Cochrane Collaboration, 2015. Available from
- 24 <http://qim.cochrane.org/supplemental-handbook-guidance>
- 25
- 26 34. Booth A. Searching for qualitative research for inclusion in systematic reviews: a
- 27 structured methodological review. *Systematic Reviews* 2016;5:74. DOI 10.1186/s13643-
- 28 016-0249-x
- 29
- 30 35. Wilczynski NLMS, Hayes RB. Search strategies for identifying qualitative studies in
- 31 CINAHL. *Qual. Health Res* 2007;17:705-710.
- 32
- 33 36. Wong SSWN, Hayes RB. Developing optimal search strategies for detecting clinically
- 34 relevant studies in MEDLINE. *Stud Health Technol Inform* 2004;107:311-316.
- 35
- 36 37. Walters LA, Wilczynski NLMS, Hayes RB. Developing Optimal Search Strategies for
- 37 Retrieving Clinically Relevant Qualitative Studies in EMBASE. *Qual Health Res* 2006;
- 38 16:162-8
- 39
- 40 38. McKibbin KAWN, Hayes RB. Developing optimal search strategies for retrieving
- 41 qualitative studies in PsycINFO. *Eval Health Prof.* 2006;29:440-454.
- 42
- 43 39. Chaillet N, Dumont A. Evidence-based strategies for reducing cesarean section rates: a
- 44 meta-analysis. *Birth* 2007;34:53-64.
- 45
- 46 40. Hartmann KE, Andrews JC, Jerome RN, Lewis RM, Likis FE, McKoy JN, et al..
- 47 Strategies to Reduce Cesarean Birth in Low-Risk Women [Internet]. Rockville (MD):
- 48 Agency for Healthcare Research and Quality (US). AHRQ Comparative Effectiveness
- 49 Review 2012; Report No.: 12(13)-EHC128-EF.
- 50
- 51 41. Weaver JJ, Statham H, Richards M. Are there “unnecessary” caesarean sections?
- 52 Perceptions of women and obstetricians about caesarean sections for non-clinical
- 53 indications. *BIRTH* 2007;34:32-41.
- 54
- 55 42. Clara Bermúdez-Tamayo, Mira Johri, Francisco Jose Perez-Ramos, Gracia Maroto-
- 56 Navarro, Africa Caño-Aguilar, Leticia Garcia-Mochon et al Evaluation of quality
- 57 improvement for cesarean sections programmes through mixed methods.
- 58 *Implementation Science* 2014;(9):182.
- 59
- 60 43. Kaboré C, Ridde V, Kouanda S, Queuille L, Somé PA, Agier I et al. DECIDE: a cluster
- randomized controlled trial to reduce non-medically indicated caesareans in Burkina
- Faso. *BMC Pregnancy and Childbirth* 2016;16:322.



- 1
  - 2
  - 3
  - 4
  - 5
  - 6
  - 7
  - 8
  - 9
  - 10
  - 11
  - 12
  - 13
  - 14
  - 15
  - 16
  - 17
  - 18
  - 19
  - 20
  - 21
  - 22
  - 23
  - 24
  - 25
  - 26
  - 27
  - 28
  - 29
  - 30
  - 31
  - 32
  - 33
  - 34
  - 35
  - 36
  - 37
  - 38
  - 39
  - 40
  - 41
  - 42
  - 43
  - 44
  - 45
  - 46
  - 47
  - 48
  - 49
  - 50
  - 51
  - 52
  - 53
  - 54
  - 55
  - 56
  - 57
  - 58
  - 59
  - 60
44. Chen Y, Lu W, Zhang YF. Informed choice and autonomy of decision making on caesarean section in China. *Maternal and Child Health Care of China* 2008;23:89-92. (Chinese).
45. Liu L, Tao FB, Huang K. Qualitative study on affecting factors of continuing increasing in caesarean section rate in rural area. *Modern Preventive Medicine*. 2010; 37: 3865-9. (Chinese).
46. Wang N, Ding Y. Reasons for obstetric medial staff choosing cesarean section for themselves in the absence of medical indications: a qualitative study. *Journal of Nursing Science* 2013;28(6):39-41. (Chinese).
47. Melman S, Schreurs RHP, Dirksen CD, Kwee A, Nijhuis JG, Smeets NAC, Scheepers HCJ, Hermens RPMG. Identification of barriers and facilitators for optimal cesarean section care: perspective of professionals. *BMC Pregnancy and Childbirth* 2017;17:230.
48. Belizan M, Meier A, Althabe F, Codazzi A, Colomar M, Buekens P, Belizan J, Walsh J, Campbell MC. Facilitators and barriers to adoption of evidence-based perinatal care in Latin American hospitals: a qualitative study. *Health Education Research* 2007: doi:10.1093/her/cym012
49. Lewin S, Glenton C, Munthe-Kaas H, Carlsen B, Colvin CJ, Gulmezoglu M, Noyes J, Booth A, Garside R, Rashidian A: Using qualitative evidence in decision making for health and social interventions: an approach to assess confidence in findings from qualitative evidence syntheses (GRADE-CERQual). *PLoS Medicine* 2015;12( 10): e1001895.
50. Lewin S, Bohren MA, Rashidian A, Munthe-Kaas H, Glenton C, Colvin CJ, Garside R, Noyes J, Tunçalp O, Wainwright M, Flottorp S, Tucker JD, Carlsen B. Applying the GRADE-CERQual approach: making an overall CERQual assessment of confidence and creating a Summary of Qualitative Findings table. *Implementation Science*. 2018;13:2.
51. Finlayson K, Downe S (2013) Why do women not use antenatal services in low-income and middle-income countries? A meta-synthesis of qualitative studies. *PloS Med* 10(1):e1001373. pmid:23349622
52. Kingdon C, Neilson J, Singleton V, Gyte G, Hart A, Gabbay M, Lavender, T. Choice and birth method: Mixed-method study of caesarean delivery for maternal request. *BJOG* 2009;116:886–895.
53. Osis MJD, Cecatti JG, Kádúa KS. Brazilian doctors' perspective on the second opinion strategy before a C-section. *Rev Saude Publica*. 2006;40(2):233-9.
54. Kamal P, Dixon-Woods M, Kurinczuk JJ, Oppenheimer C, Squire P, Waugh J. Factors influencing repeat caesarean section: qualitative exploratory study of obstetricians' and midwives' accounts. *BJOG* 2005; 112: 1054-1060.
55. Chaillet N, Dube E, Dugas M, Francoeur D, Dube J, Gagon S, Poitras, Dumont A. Identifying barriers and facilitators towards implementing guidelines to reduce caesarean section rates in Quebec. *Bulletin of the World Health Organization* 2007 85;10:791-797.
56. Wanyonyi SZ, Mukaindo AM, Stones W. Perspectives on the practice of vaginal birth after caesarean section in East Africa. *East African Medical Journal* 2010;87(8):335-339.
57. Yazdizadeh B, Nedjat S, Mohammad K, Rashidian A, Changizi N, Majdzadeh R. Cesarean section rate in Iran, multidimensional approaches for behavioral change of providers: a qualitative study. *BMC Health Services Research* 2011;11:159.

- 1
  - 2
  - 3
  - 4
  - 5
  - 6
  - 7
  - 8
  - 9
  - 10
  - 11
  - 12
  - 13
  - 14
  - 15
  - 16
  - 17
  - 18
  - 19
  - 20
  - 21
  - 22
  - 23
  - 24
  - 25
  - 26
  - 27
  - 28
  - 29
  - 30
  - 31
  - 32
  - 33
  - 34
  - 35
  - 36
  - 37
  - 38
  - 39
  - 40
  - 41
  - 42
  - 43
  - 44
  - 45
  - 46
  - 47
  - 48
  - 49
  - 50
  - 51
  - 52
  - 53
  - 54
  - 55
  - 56
  - 57
  - 58
  - 59
  - 60
58. Cox KJ. Providers' perspectives on the vaginal birth after cesarean guidelines in Florida, United States: a qualitative study. *BMC Pregnancy and Childbirth* 2011; 11:72.
59. Dunn S, Sprague AE, Fell DB, Dy J, Harrold JA, Lamontagne B, Walker M. The Use of a Quality Indicator to Reduce Elective Repeat Caesarean Section for Low-Risk Women Before 39 Weeks' Gestation: The Eastern Ontario Experience. *J Obstet Gynaecol Can* 2013;35(4):306–316.
60. Lotfi R, Tehrani FR, Dovom MR, Torkestani F, Abedini M, Sajedinejad S. Development of strategies to reduce cesarean delivery rates in Iran 2012-2014: a mixed methods study. *Int J Prev Med* 2014;5(12):1552-1556.
61. Colomar M, Cafferata ML, Aleman A, Castellano G, Elorrio EG, Althabe F, Engelbrecht S. Mode of Childbirth in Low-Risk Pregnancies: Nicaraguan Physicians' Viewpoints. *Matern Child Health J* 2014;18:2382–2392.
62. Marshall JL, Spilby H, McCormick F. Evaluating the 'Focus on Normal Birth and Reducing Caesarean section Rates Rapid Improvement Programme': A mixed method study in England. *Midwifery* 2015;31:332–340.
63. Litorp H, Mgaya A, Mbekenga CK, Kidanto HL, Johnsdotter S, Essen B. Fear, blame and transparency: obstetric caregivers' rationale for high caesarean section rates in low-resource setting. *Soc Sci Med* 2015;143:232-240.
64. Lundgren I, Limbeek E, Vehvilainen-Julkunen, Nilsson C. Clinicians' views of factors of importance for improving the rate of VBAC (vaginal birth after caesarean section): a qualitative study from countries with high VBAC rates. *BMC Pregnancy and Childbirth* 2015;15:196.
65. Lundgren I, Healy P, Carroll M, Begley C, Matteredne A, Gross MM, Grylka-Baeschlin S, Nicoletti J, Morano S, Nilsson, Lalor J. Clinicians' views of factors of importance for improving the rate of VBAC (vaginal birth after caesarean section): a study from countries with low VBAC rates. *BMC Pregnancy and childbirth* 2016;16:350.
66. Foureur M, Turkmani S, Clack DS, Davis DL, Mollart L, Leiser B, Homer CSE. Caring for women wanting a vaginal birth after previous caesarean section: A qualitative study of the experiences of midwives and obstetricians. *Women and Birth* 2017; 30:3-8.
67. Binfa L, Pantoja L, Ortiz J, Gurovich M, Cavada G. Assessment of the implementation of the model of integrated and humanised midwifery health services in Santiago. *Midwifery* 2013;29:1151-1157.
68. Binfa L, Pantoja L, Ortiz J, Gurovich M, Cavada G, Foster J. Assessment of the implementation of the model of integrated and humanised midwifery health services in Chile. *Midwifery*. 2016;35:53-61
69. Janani F, Kohan S, Taleghani F, Ghafarzadeh M. Challenges to implementing physiologic birth program (PBP): A qualitative study of midwives' opinions in Iran. *Acta Medica Mediterranea* 2015;31:1373
70. Kennedy HP, Doig E, Tillman S, Straus A, Williams B, Pettker C, Illuzzi J. Perspectives on Promoting Hospital Primary Vaginal Birth: A Qualitative Study. *BIRTH* 2016;43:336-345
71. Darling F. Practitioners' views and barriers to implementation of the keeping birth normal tool: A pilot study. *BJM* 2016. <https://doi.org/10.12968/bjom.2016.24.7.508>
72. Kerrigan A, Kingdon C, Cheyne H. Obesity and normal birth: A qualitative study of clinican's management of obese pregnant women during labour. *BMC Pregnancy and Childbirth* 2015;15:256.
73. Cheyne H, Abhyankar P, McCourt C. Empowering change: Realist evaluation of a Scottish Government programme to support normal birth. *Midwifery* 2013;29:1110-1121.

- 1  
2  
3 74. Hunter B. Implementing a National Policy Initiative to Support Normal Birth: Lessons  
4 from the All Wales Clinical Pathway for Normal Labour. *J Midwifery Womens Health*  
5 2010;55:226–233.
- 6 75. Hunter B, Segrott J. Using a Clinical Pathway to Support Normal Birth: Impact on  
7 Practitioner Roles and Working Practices. *BIRTH* 2010;37:227-235
- 8 76. Hunter B, Segrott J. Renegotiating inter-professional boundaries in maternity care:  
9 implementing a clinical pathway for normal labour. *Sociology of Health & Illness*  
10 2014;36:719–737.
- 11 77. Behuruzi R, Hatem M, Fraser W, Goulet L, Li M, Misago C. Facilitators and barriers in  
12 the humanization of birth in Japan. *BMC Pregnancy and Childbirth* 2010;10:25
- 13 78. Kennedy HP, Grant J, Walton C, Shaw-Battista J, Sandall J. Normalizing birth in  
14 England: A qualitative study. *Journal of Midwifery and Women's Health* 2010;55: 262-  
15 269.
- 16 79. Kennedy HP, Grant J, Sandall J. Elective caesarean delivery: A mixed-method  
17 qualitative investigation. *Midwifery* 2013;29:e138-e144
- 18 80. Huang K, Tao FB, Faragher B, Raven J, Tolhurst R, Tang S, van den Broek N. A mixed-  
19 method study of factors associated with differences in caesarean section rates at  
20 community level: The case of rural China. *Midwifery* 2013;29(8): 911-20.
- 21 81. Bagheri A, Masoudi Alavi N, Abbaszadeh F. Iranian obstetricians' views about the  
22 factors that influence pregnant women's choice of delivery method: A qualitative study.  
23 *Women and birth* 2013;26(1):e45-9.
- 24 82. Klein MC, Liston R, Fraser WD, Baradaran N, Hearps, SJC, Tomkinson J, Kaczorowski  
25 J, Brant R and the Maternity Research Group. Attitudes of the new generation of  
26 Canadian Obstetricians: How do they differ from their predecessors? *BIRTH* 38;2:129-  
27 139.
- 28 83. Kvernflaten B. Meeting targets or saving lives: maternal health policy and Millenium  
29 development goal 5 in Nicaragua. *Reproductive Health Matters*. 2013; 21 (42):32-40
- 30 84. Berrow D, Humphrey C, Hayward J. Understanding the relationship between research  
31 and clinical policy: a study of clinicians views. *Quality in Healthcare* 1997; 6:81-186.
- 32 85. Gabbay J, le May A. Evidence based guidelines or collectively constructed "mindlines?"  
33 Ethnographic study of knowledge management in primary care.  
34 *BMJ* 2004;329(7473):1013.
- 35 86. Ajzen I. The Theory of Planned Behaviour. *Organizational Behavior and Human*  
36 *Decision Processes* 1991;50(2):179-211.
- 37 87. Fishbein M, Ajzen I. Predicting and Changing Behavior: The Reasoned Action  
38 Approach. New York: Taylor & Francis, 2010
- 39 88. Liang J, Mu Y, Li X, Tang W, Wang Y, Liu Z, Huang X, Scherpbier RW, Guo S, Li M, Dai  
40 L, Deng K, Deng C, Li Q, Kang L, Zhu J, Ronsmans C. Relaxation of the one child policy  
41 and trends in caesarean section rates and birth outcomes in China between 2012 and  
42 2016: observational study of nearly seven million health facility births. *BMJ* 2018; 360  
43 doi: <https://doi.org/10.1136/bmj.k817>
- 44 89. Kingdon C, Betran AP, Downe S. Women's and communities' views of targeted  
45 educational interventions to reduce unnecessary caesarean section: A qualitative  
46 evidence synthesis. *Reproductive Health* (under review REPH-D-18-00204)
- 47 90. Kingdon C, Betran AP, Downe S. Non-clinical interventions to reduce unnecessary  
48 caesarean section targeted at organisations, facilities and systems: A qualitative  
49 evidence synthesis of stakeholders' views. *PLOS One* (under review PONE-D-18-094)
- 50  
51  
52  
53  
54  
55  
56  
57  
58  
59  
60



1  
2  
3  
4  
5  
6  
7  
8  
9  
10  
11  
12  
13  
14  
15  
16  
17  
18  
19  
20  
21  
22  
23  
24  
25  
26  
27  
28  
29  
30  
31  
32  
33  
34  
35  
36  
37  
38  
39  
40  
41  
42  
43  
44  
45  
46  
47  
48  
49  
50  
51  
52  
53  
54  
55  
56  
57  
58  
59  
60

For peer review only

1  
2  
3  
4  
5  
6  
7  
8  
9  
10  
11  
12  
13  
14  
15  
16  
17  
18  
19  
20  
21  
22  
23  
24  
25  
26  
27  
28  
29  
30  
31  
32  
33  
34  
35  
36  
37  
38  
39  
40  
41  
42  
43  
44  
45  
46  
47  
48  
49  
50  
51  
52  
53  
54  
55  
56  
57  
58  
59  
60

Figure 1: Process of article selection with inclusion and exclusion criteria

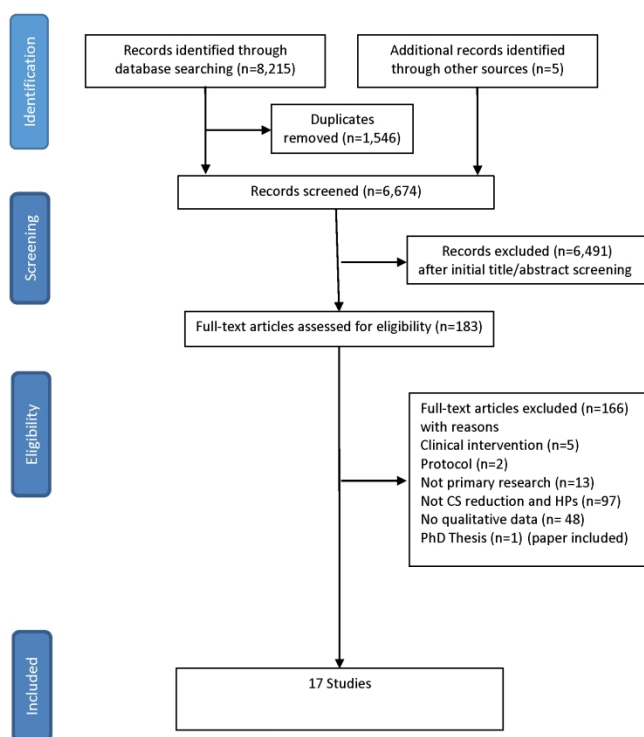

Figure 1: PRISMA Diagram

215x279mm (300 x 300 DPI)

## PROSPERO

### International prospective register of systematic reviews

The use of interventions to reduce unnecessary caesarean sections targeted at healthcare professionals: a qualitative evidence synthesis

*Carol Kingdon, Soo Downe, Ana Betrán*

#### Citation

Carol Kingdon, Soo Downe, Ana Betrán. The use of interventions to reduce unnecessary caesarean sections targeted at healthcare professionals: a qualitative evidence synthesis. PROSPERO 2017 CRD42017059455 Available from: [http://www.crd.york.ac.uk/PROSPERO/display\\_record.php?ID=CRD42017059455](http://www.crd.york.ac.uk/PROSPERO/display_record.php?ID=CRD42017059455)

#### Review question

The aim of this review is to add new evidence of what healthcare professionals think about interventions aimed at reducing unnecessary caesarean sections (including the barriers and facilitators to their use), their beliefs about caesarean section and their commitment to reducing unnecessary caesarean sections: The objectives of the review are to identify, appraise, and synthesize qualitative studies exploring:

1. Health professionals' views, perceptions and uses of educational interventions aimed at improving adherence to evidence-based clinical practices to reduce caesarean sections;
2. Health professionals' views of the perceived benefits, barriers, facilitators and disadvantages of a policy of second opinion for caesarean section to reduce caesarean section rates;
3. Health professionals' views as to how audit, feedback and peer-review can reduce caesarean section rates.

#### Searches

Electronic searches:

We will search the following electronic databases for eligible studies published from 1985 to the date the final search is run:

- CINAHL (EBSCO);
- MEDLINE (EBSCO);
- PsycINFO (EBSCO);
- EMBASE (Ovid);
- Global Index Medicus;
- POPLINE;
- African Journals Online.

Using guidelines developed by the Cochrane Qualitative Research Methods Group for searching for qualitative evidence (Noyes 2011; Booth 2016), and papers detailing strategies for optimising the identification of qualitative studies in CINAHL (Wilczynski 2007), MEDLINE (Wong 2004), EMBASE (Walters 2006) and PsycINFO (McKibbin 2006), we will develop search strategies for each database. We chose these databases as we anticipated that they would provide the highest yield of results based on preliminary, exploratory searches. There will be no geographic restrictions imposed on the search, and the date restriction is intended to ensure that health professional's views and experiences of interventions since the first WHO (1985) statement on appropriate technology for childbirth and use of caesarean section only when necessary are captured.

Searching other resources:

We will search the reference lists of all the included studies and key references (i.e. relevant systematic reviews), both back chaining and forward checking for any additional references not identified in the electronic searches which may be relevant. Key articles cited by multiple authors (citation pearls) will also be checked on Google Scholar, and the authors of relevant published protocols contacted.

#### Types of study to be included

This is a qualitative evidence synthesis, and as such, we will include all studies which have utilized

## PROSPERO

### International prospective register of systematic reviews

qualitative designs (e.g. ethnography, phenomenology) or qualitative methods for data collection (e.g. focus group interviews, individual interviews, observation, diaries, oral histories), and which have used qualitative methods for data analysis (e.g. thematic analysis, framework approach, grounded theory, thematic network analysis). We will also include mixed methods studies where it is possible to extract findings derived from qualitative research. We will exclude studies which collect data using qualitative methods, but which do not perform a qualitative analysis (for example, if qualitative data are only reported using descriptive statistics).

### Condition or domain being studied

The following working definition of unnecessary caesarean sections will be used for the purposes of this review:

'Unnecessary caesarean deliveries are those procedures that are performed in the absence of medical indications such as substantial maternal risk factors, fetal anomalies, pregnancy complications, birth weight < 2500 g or > 4000 g, and complications of labour or delivery (Koroukian 1998). Generally unnecessary caesarean deliveries are those without medical indications in which the mother is exposed to potential harms that outweigh the potential benefits (Kabir 2004).'

### Participants/population

We will include studies that focus on the views and experiences of healthcare professionals. By healthcare professionals we mean:

- Doctors of medicine (including obstetricians and gynecologists, anesthetists, and general physicians);
- Nurses and midwives.

We will focus on studies involving post-registration healthcare professionals.

Studies of medical, nursing and midwifery students and lay health workers will be excluded.

### Intervention(s), exposure(s)

In this review we will define an intervention as 'anything considered by study authors as an intervention additional to usual care undertaken with the aim of reducing unnecessary caesarean section.'

Inclusion criteria:

In accordance with the review objectives, the interventions of particular interest are:

- (1) Educational interventions targeted at healthcare professionals which aim to improve adherence to evidence-based clinical practice known to reduce caesarean sections;
- (2) Second opinion policies for caesarean section indication; and
- (3) Audits, feedback and peer-reviews of caesarean section rates.

Some existing reviews make a distinction between clinical and non-clinical interventions for reducing unnecessary caesarean sections. Clinical interventions which could help to reduce caesarean section rates include external cephalic conversion after 36 weeks, continuous support during labour, and the use of a partogram with a four-hour action line in labour (Khunpradit 2011). In this review we are particularly interested in non-clinical interventions targeted at healthcare professionals to reduce caesarean sections in nulliparous or multiparous women without a previous caesarean section (Robson Groups 1-4) and multiparous women with a previous caesarean section (Robson Group 5).

Exclusion criteria:

We will exclude clinical interventions targeted at health professionals to reduce unnecessary caesarean sections in women with a breech presentation (Robson Groups 6 and 7), multiple pregnancies (Robson Group 8), and those who have transverse or oblique lies (Robson Group 9) or preterm births (Robson Group 10). In addition, interventions targeted at women, communities and the public, and organizations, systems or facilities will be excluded, as they are the subject of two other ongoing reviews.

### Comparator(s)/control

Not applicable.

### Context

We will include studies from any setting globally where an intervention concerning unnecessary caesarean section has been developed, communicated, distributed or implemented from 1985 to 2017. These settings could include public or private health facilities (e.g. hospitals, community clinics), third sector communities

## PROSPERO

### International prospective register of systematic reviews

(e.g. charities) and e- or m-health platforms using internet technology. This time span has been chosen in order to reflect interventions developed since the first WHO statement (WHO 1985).

#### Primary outcome(s)

Studies have shown healthcare professionals' personal preferences and professional practice patterns for planned caesarean section to be varied. They suggest not only that healthcare professionals' views of caesarean sections vary according to gender, profession and socio-clinical environment, but that their views can change over time as professional opinion shifts. Policies on unnecessary caesarean sections are currently in the making and there is an urgent need to understand more about the healthcare professional's views of when or what constitutes an unnecessary caesarean section, and the beliefs which underpin their receptiveness to, or their rejection of, interventions for their reduction. This review will provide that evidence.

#### Secondary outcome(s)

Not applicable.

#### Data extraction (selection and coding)

We will collate records identified from different sources into one database and will remove duplicates. Two review authors (CK, SD) will independently assess each abstract to determine eligibility for inclusion against the a priori inclusion criteria. At this stage, we will disregard those abstracts which are clearly irrelevant to the topic of this review. The same two review authors (CK, SD) will then retrieve the full texts of all the papers that are likely to be relevant, and will independently assess them for relevance, before agreeing on the final list of included studies. In the event of any continuing lack of agreement over the inclusion of a particular study, a third review author (AB) will adjudicate, and if appropriate, we will contact study authors for further information. Study characteristics will be recorded using a form designed specifically for this review. The form will record details of: first study author, date of publication, language, country of study, setting (public, private), context (urban/rural), region (African, Americas, South-East Asian, European, Eastern Mediterranean, Western Pacific), participant group (parity, socio-demographics), the type of intervention received, the theoretical/conceptual perspectives of the study, the research methods, sample size, method of analysis, and the key themes (as recorded by the study authors in each case).

#### Risk of bias (quality) assessment

Our inclusion criteria specify that in order to be included, a study must have used qualitative methods for both data collection and data analysis, which are described in the paper. This criterion constitutes a basic quality threshold, as studies which do not meet this standard will be discarded.

In addition, to assess the methodological quality of included studies, one review author will apply a quality appraisal framework to each study. A second review author will then check for discrepancies. Any disagreements will be resolved through discussion, or by consultation with a third review author. We will use the criteria from Walsh (2006) and the A-D grading of Downe (2007), which includes an assessment of the study scope and purpose, design, sampling strategy, analysis, interpretation, researcher reflexivity, ethical dimensions, relevance, and transferability. We will then grade studies against Lincoln and Guba's summary criteria (Lincoln 1985), as follows:

- A: No, or few flaws. The study credibility, transferability, dependability, and confirmability is high.
- B: Some flaws, unlikely to affect the credibility, transferability, dependability, and/or confirmability of the study.
- C: Some flaws that may affect the credibility, transferability, dependability, and/or confirmability of the study.
- D: Significant flaws that are very likely to affect the credibility, transferability, dependability, and/or confirmability of the study.

Two review authors will independently conduct a pilot on three included studies to assess the feasibility of using this tool and to evaluate the integrity of the assessment, any disagreements being resolved by consensus. As previously stated, studies meeting the inclusion criteria will be included regardless of study quality. Quality assessment scores will be used when judging the relative contributions of each study in the development of explanations and relationships between studies, with the synthesis becoming "weighted" towards the findings of the better quality studies (Glenton 2013).

## PROSPERO

### International prospective register of systematic reviews

We will use the GRADE Confidence in the Evidence from Reviews of Qualitative research (GRADE-CERQual) approach to assess the confidence that may be placed in review findings (Lewin 2015) by applying the following four domains:

- Methodological limitations of included studies: the extent to which there are problems in the design or conduct of the primary studies that contributed evidence to a review finding.
- The relevance of the included studies to the review question: the extent to which the body of evidence from the primary studies supporting a review finding is applicable to the context (perspective or population, phenomenon of interest, setting) specified in the review question.
- The coherence of the review findings: the extent to which the review finding is well grounded in data from the contributing primary studies and provides a convincing explanation for the patterns found in these data.
- The adequacy of the data in contributing to the review findings: an overall determination of the degree of richness and quantity of data supporting a review finding.

### Strategy for data synthesis

Following the principles of meta-ethnography (Noblit and Hare 1988), we will undertake data extraction and analysis simultaneously. Meta-ethnography uses an approach based on the constant comparative technique, in which the analysis is built up study by study using the principles of confirmation ('reciprocal analysis') and dis-confirmation ('refutational analysis'). Starting with the earliest published paper, we will read each included study in detail, and will extract the relevant verbatim text, along with the themes/theories/metaphors used by the study authors. Two review authors (CK, SD) will then undertake the analysis, and any disagreements on the thematic structure/theory/amendments will be agreed by consensus throughout the extraction and analysis process. We will synthesize the resultant thematic structure into a 'line of argument' synthesis, before assessing the degree of confidence which can be placed in the evidence from the review findings (CERQual).

### Analysis of subgroups or subsets

Our data management and synthesis plan is intended to support the following sub-analysis:

Data from low- and middle-income countries, and those from high-income countries.

We propose this sub-analysis due to differences in uptake, health beliefs, and health system accessibility and quality between these two types of settings.

### Contact details for further information

Carol Kingdon

ckingdon@uclan.ac.uk

### Organisational affiliation of the review

World Health Organization

### Review team members and their organisational affiliations

Dr Carol Kingdon. University of Central Lancashire

Professor Soo Downe. University of Central Lancashire

Dr Ana Betrán. World Health Organization

### Anticipated or actual start date

03 January 2017

### Anticipated completion date

28 July 2017

### Funding sources/sponsors

World Health Organization

### Conflicts of interest

None known

## PROSPERO

### International prospective register of systematic reviews

#### Language

English

#### Country

England

#### Stage of review

Review\_Ongoing

#### Subject index terms status

Subject indexing assigned by CRD

#### Subject index terms

Attitude of Health Personnel; Cesarean Section; Delivery of Health Care; Female; Health Personnel; Humans; Parturition; Pregnancy; Unnecessary Procedures

#### Date of registration in PROSPERO

18 May 2017

#### Date of publication of this version

18 May 2017

#### Details of any existing review of the same topic by the same authors

#### Stage of review at time of this submission

| Stage                                                           | Started | Completed |
|-----------------------------------------------------------------|---------|-----------|
| Preliminary searches                                            | Yes     | Yes       |
| Piloting of the study selection process                         | Yes     | Yes       |
| Formal screening of search results against eligibility criteria | No      | No        |
| Data extraction                                                 | No      | No        |
| Risk of bias (quality) assessment                               | No      | No        |
| Data analysis                                                   | No      | No        |

#### Versions

18 May 2017

#### PROSPERO

This information has been provided by the named contact for this review. CRD has accepted this information in good faith and registered the review in PROSPERO. CRD bears no responsibility or liability for the content of this registration record, any associated files or external websites.



### Additional Information (Appendix 0: PRISMA Checklist)

| Section/topic             | #  | Checklist item                                                                                                                                                                                                                                                                                              | Reported on page # |
|---------------------------|----|-------------------------------------------------------------------------------------------------------------------------------------------------------------------------------------------------------------------------------------------------------------------------------------------------------------|--------------------|
| <b>TITLE</b>              |    |                                                                                                                                                                                                                                                                                                             |                    |
| Title                     | 1  | Identify the report as a systematic review, meta-analysis, or both.                                                                                                                                                                                                                                         | 1                  |
| <b>ABSTRACT</b>           |    |                                                                                                                                                                                                                                                                                                             |                    |
| Structured summary        | 2  | Provide a structured summary including, as applicable: background; objectives; data sources; study eligibility criteria, participants, and interventions; study appraisal and synthesis methods; results; limitations; conclusions and implications of key findings; systematic review registration number. | 2                  |
| <b>INTRODUCTION</b>       |    |                                                                                                                                                                                                                                                                                                             |                    |
| Rationale                 | 3  | Describe the rationale for the review in the context of what is already known.                                                                                                                                                                                                                              | 4                  |
| Objectives                | 4  | Provide an explicit statement of questions being addressed with reference to participants, interventions, comparisons, outcomes, and study design (PICOS).                                                                                                                                                  | 5                  |
| <b>METHODS</b>            |    |                                                                                                                                                                                                                                                                                                             |                    |
| Protocol and registration | 5  | Indicate if a review protocol exists, if and where it can be accessed (e.g., Web address), and, if available, provide registration information including registration number.                                                                                                                               | 3,5                |
| Eligibility criteria      | 6  | Specify study characteristics (e.g., PICOS, length of follow-up) and report characteristics (e.g., years considered, language, publication status) used as criteria for eligibility, giving rationale.                                                                                                      | 5-6                |
| Information sources       | 7  | Describe all information sources (e.g., databases with dates of coverage, contact with study authors to identify additional studies) in the search and date last searched.                                                                                                                                  | 5-6                |
| Search                    | 8  | Present full electronic search strategy for at least one database, including any limits used, such that it could be repeated.                                                                                                                                                                               | Supplementary file |
| Study selection           | 9  | State the process for selecting studies (i.e., screening, eligibility, included in systematic review, and, if applicable, included in the meta-analysis).                                                                                                                                                   | 5-6                |
| Data collection process   | 10 | Describe method of data extraction from reports (e.g., piloted forms, independently, in duplicate) and any processes for obtaining and confirming data from investigators.                                                                                                                                  | 6                  |



|                                    |    |                                                                                                                                                                                                                        |                |
|------------------------------------|----|------------------------------------------------------------------------------------------------------------------------------------------------------------------------------------------------------------------------|----------------|
| Data items                         | 11 | List and define all variables for which data were sought (e.g., PICOS, funding sources) and any assumptions and simplifications made.                                                                                  | 5-6            |
| Risk of bias in individual studies | 12 | Describe methods used for assessing risk of bias of individual studies (including specification of whether this was done at the study or outcome level), and how this information is to be used in any data synthesis. | 5-6            |
| Summary measures                   | 13 | State the principal summary measures (e.g., risk ratio, difference in means).                                                                                                                                          | Not applicable |
| Synthesis of results               | 14 | Describe the methods of handling data and combining results of studies, if done, including measures of consistency (e.g., $I^2$ ) for each meta-analysis.                                                              | 6              |

| Section/topic                 | #  | Checklist item                                                                                                                                                                                           | Reported on page #        |
|-------------------------------|----|----------------------------------------------------------------------------------------------------------------------------------------------------------------------------------------------------------|---------------------------|
| Risk of bias across studies   | 15 | Specify any assessment of risk of bias that may affect the cumulative evidence (e.g., publication bias, selective reporting within studies).                                                             | 5-6                       |
| Additional analyses           | 16 | Describe methods of additional analyses (e.g., sensitivity or subgroup analyses, meta-regression), if done, indicating which were pre-specified.                                                         | Not applicable            |
| <b>RESULTS</b>                |    |                                                                                                                                                                                                          |                           |
| Study selection               | 17 | Give numbers of studies screened, assessed for eligibility, and included in the review, with reasons for exclusions at each stage, ideally with a flow diagram.                                          | Figure 1                  |
| Study characteristics         | 18 | For each study, present characteristics for which data were extracted (e.g., study size, PICOS, follow-up period) and provide the citations.                                                             | Table 1                   |
| Risk of bias within studies   | 19 | Present data on risk of bias of each study and, if available, any outcome level assessment (see item 12).                                                                                                | Table 1                   |
| Results of individual studies | 20 | For all outcomes considered (benefits or harms), present, for each study: (a) simple summary data for each intervention group (b) effect estimates and confidence intervals, ideally with a forest plot. | Not applicable            |
| Synthesis of results          | 21 | Present results of each meta-analysis done, including confidence intervals and measures of consistency.                                                                                                  | 7-18 synthesis of results |
| Risk of bias across studies   | 22 | Present results of any assessment of risk of bias across studies (see Item 15).                                                                                                                          | CERQual                   |

|                     |    |                                                                                                                                                                                      |                |
|---------------------|----|--------------------------------------------------------------------------------------------------------------------------------------------------------------------------------------|----------------|
|                     |    |                                                                                                                                                                                      | Table 2 and S2 |
|                     |    |                                                                                                                                                                                      |                |
| Additional analysis | 23 | Give results of additional analyses, if done (e.g., sensitivity or subgroup analyses, meta-regression [see Item 16]).                                                                | Not applicable |
| <b>DISCUSSION</b>   |    |                                                                                                                                                                                      |                |
| Summary of evidence | 24 | Summarize the main findings including the strength of evidence for each main outcome; consider their relevance to key groups (e.g., healthcare providers, users, and policy makers). | 18             |
| Limitations         | 25 | Discuss limitations at study and outcome level (e.g., risk of bias), and at review-level (e.g., incomplete retrieval of identified research, reporting bias).                        | 19             |
| Conclusions         | 26 | Provide a general interpretation of the results in the context of other evidence, and implications for future research.                                                              | 19-21          |
| <b>FUNDING</b>      |    |                                                                                                                                                                                      |                |
| Funding             | 27 | Describe sources of funding for the systematic review and other support (e.g., supply of data); role of funders for the systematic review.                                           | 3              |

## Additional Information (Appendix 1: Search strategy CINAHL Complete (EBSCOhost))

| #   | Query                                                                                                                                                              | Limiters/Expanders            | Last run via                                                                                              | Results |
|-----|--------------------------------------------------------------------------------------------------------------------------------------------------------------------|-------------------------------|-----------------------------------------------------------------------------------------------------------|---------|
| S1  | (MH "Women+") OR "woman"                                                                                                                                           | Search modes - Boolean/Phrase | Interface - EBSCOhost Research Databases<br>Search Screen - Advanced Search<br>Database - CINAHL Complete | 48,423  |
| S2  | (MH "Expectant Mothers") OR (MH "Expectant Parents+") OR (MH "Expectant Fathers") OR (MH "Mothers+")                                                               | Search modes - Boolean/Phrase | Interface - EBSCOhost Research Databases<br>Search Screen - Advanced Search<br>Database - CINAHL Complete | 26,493  |
| S3  | (MH "Maternal Attitudes") OR "maternal"                                                                                                                            | Search modes - Boolean/Phrase | Interface - EBSCOhost Research Databases<br>Search Screen - Advanced Search<br>Database - CINAHL Complete | 61,963  |
| S4  | (MH "Fathers+") OR "father"                                                                                                                                        | Search modes - Boolean/Phrase | Interface - EBSCOhost Research Databases<br>Search Screen - Advanced Search<br>Database - CINAHL Complete | 8,739   |
| S5  | (MH "Communities+")                                                                                                                                                | Search modes - Boolean/Phrase | Interface - EBSCOhost Research Databases<br>Search Screen - Advanced Search<br>Database - CINAHL Complete | 34,885  |
| S6  | (MH "Public Policy+") OR (MH "Public Opinion") OR (MH "Public Relations+") OR "public"                                                                             | Search modes - Boolean/Phrase | Interface - EBSCOhost Research Databases<br>Search Screen - Advanced Search<br>Database - CINAHL Complete | 313,760 |
| S7  | S1 OR S2 OR S3 OR S4 OR S5 OR S6                                                                                                                                   | Search modes - Boolean/Phrase | Interface - EBSCOhost Research Databases<br>Search Screen - Advanced Search<br>Database - CINAHL Complete | 460,465 |
| S8  | (MH "Personnel, Health Facility+# OR #MH "Attitude of Health Personnel+# OR #MH "Medical Staff+# OR #MH "Staff Nurses+# OR #MH "Staff Development+# OR "staff"     | Search modes - Boolean/Phrase | Interface - EBSCOhost Research Databases<br>Search Screen - Advanced Search<br>Database - CINAHL Complete | 171,947 |
| S9  | (MH "Organizational Culture+") OR "organization"                                                                                                                   | Search modes - Boolean/Phrase | Interface - EBSCOhost Research Databases<br>Search Screen - Advanced Search<br>Database - CINAHL Complete | 59,785  |
| S10 | (MH "Personnel, Health Facility+# OR #MH "Hospital Units+") OR "facility"                                                                                          | Search modes - Boolean/Phrase | Interface - EBSCOhost Research Databases<br>Search Screen - Advanced Search<br>Database - CINAHL Complete | 134,476 |
| S11 | (MH "Midwife Attitudes") OR (MH "Nurse Midwives") OR (MH "Midwives") OR (MH "Midwifery Service") OR (MH "Education, Nurse Midwifery") OR "midwife"                 | Search modes - Boolean/Phrase | Interface - EBSCOhost Research Databases<br>Search Screen - Advanced Search<br>Database - CINAHL Complete | 15,040  |
| S12 | (MH "Physician Attitudes") OR "Physician"                                                                                                                          | Search modes - Boolean/Phrase | Interface - EBSCOhost Research Databases<br>Search Screen - Advanced Search<br>Database - CINAHL Complete | 83,592  |
| S13 | (MH "Health Systems Agencies")                                                                                                                                     | Search modes - Boolean/Phrase | Interface - EBSCOhost Research Databases<br>Search Screen - Advanced Search<br>Database - CINAHL Complete | 203     |
| S14 | (MH "Multidisciplinary Care Team+") OR "health care provider"                                                                                                      | Search modes - Boolean/Phrase | Interface - EBSCOhost Research Databases<br>Search Screen - Advanced Search<br>Database - CINAHL Complete | 34,717  |
| S15 | S8 OR S9 OR S10 OR S11 OR S12 OR S13 OR S14                                                                                                                        | Search modes - Boolean/Phrase | Interface - EBSCOhost Research Databases<br>Search Screen - Advanced Search<br>Database - CINAHL Complete | 414,412 |
| S16 | S7 OR S15                                                                                                                                                          | Search modes - Boolean/Phrase | Interface - EBSCOhost Research Databases<br>Search Screen - Advanced Search<br>Database - CINAHL Complete | 815,501 |
| S17 | (MH "Early Intervention+") OR (MH "Intervention Trials") OR (MH "Nursing Interventions") OR (MH "Experimental Studies+") OR "Intervention"                         | Search modes - Boolean/Phrase | Interface - EBSCOhost Research Databases<br>Search Screen - Advanced Search<br>Database - CINAHL Complete | 378,666 |
| S18 | (MH "Program Evaluation") OR (MH "Summative Evaluation Research") OR (MH "Formative Evaluation Research") OR (MH "Evaluation Research+") OR "programme evaluation" | Search modes - Boolean/Phrase | Interface - EBSCOhost Research Databases<br>Search Screen - Advanced Search<br>Database - CINAHL Complete | 72,501  |

|     |                                                                                                                                                                                              |                               |                                                                                                     |           |
|-----|----------------------------------------------------------------------------------------------------------------------------------------------------------------------------------------------|-------------------------------|-----------------------------------------------------------------------------------------------------|-----------|
| S19 | (MH "Quality Improvement+") OR (MH "Clinical Documentation Improvement") OR (MH "Evaluation and Quality Improvement Program") OR (MH "Change Management") OR "improvement"                   | Search modes - Boolean/Phrase | Interface - EBSCOhost Research Databases Search Screen - Advanced Search Database - CINAHL Complete | 121,753   |
| S20 | (MH "Organizational Change")                                                                                                                                                                 | Search modes - Boolean/Phrase | Interface - EBSCOhost Research Databases Search Screen - Advanced Search Database - CINAHL Complete | 9,832     |
| S21 | (MH "Patient Education+")                                                                                                                                                                    | Search modes - Boolean/Phrase | Interface - EBSCOhost Research Databases Search Screen - Advanced Search Database - CINAHL Complete | 64,052    |
| S22 | (MH "Decision Support Techniques+") OR (MH "Decision Support Systems, Clinical") OR (MH "Decision Support Systems, Management") OR (MH "Decision Making, Organizational") OR "decision aids" | Search modes - Boolean/Phrase | Interface - EBSCOhost Research Databases Search Screen - Advanced Search Database - CINAHL Complete | 12,332    |
| S23 | (MH "Education, Nursing, Continuing") OR (MH "Education, Medical, Continuing") OR (MH "Education, Continuing+") OR "continuing professional education"                                       | Search modes - Boolean/Phrase | Interface - EBSCOhost Research Databases Search Screen - Advanced Search Database - CINAHL Complete | 27,501    |
| S24 | (MH "Clinical Competence+") OR (MH "Practice Patterns") OR (MH "Clinical Exemplars") OR (MH "Teaching Materials, Clinical") OR (MH "Clinical Assessment Tools+") OR "clinical audit"         | Search modes - Boolean/Phrase | Interface - EBSCOhost Research Databases Search Screen - Advanced Search Database - CINAHL Complete | 210,091   |
| S25 | (MH "Practice Guidelines") OR (MH "Guideline Adherence") OR (MH "Public Policy") OR (MH "Policy Making") OR "guidelines"                                                                     | Search modes - Boolean/Phrase | Interface - EBSCOhost Research Databases Search Screen - Advanced Search Database - CINAHL Complete | 138,839   |
| S26 | (MH "Harm Reduction") OR "reduce"                                                                                                                                                            | Search modes - Boolean/Phrase | Interface - EBSCOhost Research Databases Search Screen - Advanced Search Database - CINAHL Complete | 94,257    |
| S27 | (MH "Public Opinion") OR (MH "Referral and Consultation+") OR "routine second opinion"                                                                                                       | Search modes - Boolean/Phrase | Interface - EBSCOhost Research Databases Search Screen - Advanced Search Database - CINAHL Complete | 33,876    |
| S28 | barriers or obstacles or challenges                                                                                                                                                          | Search modes - Boolean/Phrase | Interface - EBSCOhost Research Databases Search Screen - Advanced Search Database - CINAHL Complete | 150,472   |
| S29 | facilitators or motivators                                                                                                                                                                   | Search modes - Boolean/Phrase | Interface - EBSCOhost Research Databases Search Screen - Advanced Search Database - CINAHL Complete | 7,344     |
| S30 | S17 OR S18 OR S19 OR S20 OR S21 OR S22 OR S23 OR S24 OR S25 OR S26 OR S27 OR S28 OR S29                                                                                                      | Search modes - Boolean/Phrase | Interface - EBSCOhost Research Databases Search Screen - Advanced Search Database - CINAHL Complete | 1,069,163 |
| S31 | Cesarean                                                                                                                                                                                     | Search modes - Boolean/Phrase | Interface - EBSCOhost Research Databases Search Screen - Advanced Search Database - CINAHL Complete | 16,553    |
| S32 | (MH "Cesarean Section+# OR #MH "Cesarean Section, Repeat"# OR #MH "Vaginal Birth After Cesarean"# OR #MH "Cesarean Section, Elective"# OR "cesarean"                                         | Search modes - Boolean/Phrase | Interface - EBSCOhost Research Databases Search Screen - Advanced Search Database - CINAHL Complete | 16,532    |
| S33 | (MH "Childbirth+") OR "childbirth" OR (MH "Childbirth Educators") OR (MH "Childbirth Education") OR (MH "Home Childbirth")                                                                   | Search modes - Boolean/Phrase | Interface - EBSCOhost Research Databases Search Screen - Advanced Search Database - CINAHL Complete | 26,326    |
| S34 | S31 OR S32 OR S33                                                                                                                                                                            | Search modes - Boolean/Phrase | Interface - EBSCOhost Research Databases Search Screen - Advanced Search Database - CINAHL Complete | 39,207    |
| S35 | qualitative research                                                                                                                                                                         | Search modes - Boolean/Phrase | Interface - EBSCOhost Research Databases Search Screen - Advanced Search Database - CINAHL Complete | 10,083    |

|     |                                                                                                                                        |                                                                               |                                                                                                     |           |
|-----|----------------------------------------------------------------------------------------------------------------------------------------|-------------------------------------------------------------------------------|-----------------------------------------------------------------------------------------------------|-----------|
| S36 | (MH "Structured Interview") OR (MH "Interviews+") OR "interviews" OR (MH "Unstructured Interview") OR (MH "Semi-Structured Interview") | Search modes - Boolean/Phrase                                                 | Interface - EBSCOhost Research Databases Search Screen - Advanced Search Database - CINAHL Complete | 184,622   |
| S37 | (MH "Attitude") OR (MH "Behavior+") OR (MH "Attitude of Health Personnel") OR (MH "Family Attitudes") OR (MH "Social Values+")         | Search modes - Boolean/Phrase                                                 | Interface - EBSCOhost Research Databases Search Screen - Advanced Search Database - CINAHL Complete | 701,738   |
| S38 | qualitative or case study or interview or observation or focus group or ethnograph or case study                                       | Search modes - Boolean/Phrase                                                 | Interface - EBSCOhost Research Databases Search Screen - Advanced Search Database - CINAHL Complete | 400,983   |
| S39 | (MH "Qualitative Studies+") OR "qualitative"                                                                                           | Search modes - Boolean/Phrase                                                 | Interface - EBSCOhost Research Databases Search Screen - Advanced Search Database - CINAHL Complete | 126,780   |
| S40 | view* OR want* OR cho* OR prefer* OR feel* OR thought* OR like OR accept* OR dislike OR wish OR hope or fear                           | Search modes - Boolean/Phrase                                                 | Interface - EBSCOhost Research Databases Search Screen - Advanced Search Database - CINAHL Complete | 450,000   |
| S41 | S35 OR S36 OR S37 OR S38 OR S39 OR S40                                                                                                 | Search modes - Boolean/Phrase                                                 | Interface - EBSCOhost Research Databases Search Screen - Advanced Search Database - CINAHL Complete | 1,261,828 |
| S42 | S34 AND S41                                                                                                                            | Search modes - Boolean/Phrase                                                 | Interface - EBSCOhost Research Databases Search Screen - Advanced Search Database - CINAHL Complete | 11,721    |
| S43 | S16 AND S30 AND S42                                                                                                                    | Limiters - Published Date: 19850101-20171231<br>Search modes - Boolean/Phrase | Interface - EBSCOhost Research Databases Search Screen - Advanced Search Database - CINAHL Complete | 2,225     |
| S89 | S17 OR S21                                                                                                                             | Search modes - Boolean/Phrase                                                 | Interface - EBSCOhost Research Databases Search Screen - Advanced Search Database - CINAHL Complete | 433,186   |
| S90 | S7 AND S34 AND S41 AND S89                                                                                                             | Search modes - Boolean/Phrase                                                 | Interface - EBSCOhost Research Databases Search Screen - Advanced Search Database - CINAHL Complete | 873       |
| S91 | S7 AND S31 AND S41 AND S89                                                                                                             | Search modes - Boolean/Phrase                                                 | Interface - EBSCOhost Research Databases Search Screen - Advanced Search Database - CINAHL Complete | 314       |

## Supplementary appendix: Table 1 CERQual Summary of evidence profile

| Review finding                                                                                                                                                                                                                                                                                                                                                                                                                                                                                                                                                                                                                                                                                                                                                                                                                                                                                                                                                                                                                                                                      | Studies contributing to review finding | Methodological Limitations                                                                                                                        | Coherence                                                                                                                                                                                              | Adequacy                                                                                                                                                                | Relevance                                                                                                                                      | CERQual Assessment  | Explanation of confidence in the evidence assessment                                                                                                                                                                                                                     |
|-------------------------------------------------------------------------------------------------------------------------------------------------------------------------------------------------------------------------------------------------------------------------------------------------------------------------------------------------------------------------------------------------------------------------------------------------------------------------------------------------------------------------------------------------------------------------------------------------------------------------------------------------------------------------------------------------------------------------------------------------------------------------------------------------------------------------------------------------------------------------------------------------------------------------------------------------------------------------------------------------------------------------------------------------------------------------------------|----------------------------------------|---------------------------------------------------------------------------------------------------------------------------------------------------|--------------------------------------------------------------------------------------------------------------------------------------------------------------------------------------------------------|-------------------------------------------------------------------------------------------------------------------------------------------------------------------------|------------------------------------------------------------------------------------------------------------------------------------------------|---------------------|--------------------------------------------------------------------------------------------------------------------------------------------------------------------------------------------------------------------------------------------------------------------------|
| <b>Beliefs about birth:</b> Across HIC and MICs health professionals reported varying beliefs about birth. These included a common approach to birth shared by obstetricians and midwives who valued the physiological process and worked effectively as a team to make it happen (recognising it as an empowering process for women and only intervening when medically necessary), to labour and vaginal birth as a fatally flawed physiological process with CS the preferable means to an end. This dichotomy of beliefs reflected competing ideologies of birth and shaped the importance individuals attached to CS rate reduction. In MIC, while some obstetricians who preferred CS made reference to perinatal mortality and morbidity gains, this was not the experience of the few female, Chinese obstetricians who actually had CDMR, nor the preference of Iranian obstetricians who expressed concerns about having to deal with co-morbidities caused by previous CSs. Beliefs were influenced by professional training, personal experience, and practice setting. | 1,3,5-12,14-16                         | Minor concerns regarding methodological limitations in 8 studies and moderate to significant concerns in 5 of 13 studies predominantly from MICs. | Minor concerns about coherence, with higher confidence in HIC and MIC, with no data reported to support this review finding in LICs.                                                                   | Minor concerns regarding adequacy with rich data from Iran, China, Nicaragua, USA, Canada, Finland, Sweden, The Netherlands, Germany, Italy, Ireland, Australia and UK. | Moderate concerns regarding relevance with 7 studies from HIC, 6 MIC, and none from LIC contributing to this review finding.                   | Moderate confidence | 13 studies with minor to significant methodological limitations. Rich data from 14 countries across 4 geographical regions, high- and middle- income levels, and high and low CS rates. Reasonable level of coherence with uncertain confidence in low-income countries. |
| <b>Beliefs about what constitutes necessary and unnecessary CS:</b> Some health professionals reported CS rates as determined by factors beyond their control (i.e. uncertain obstetric history, unfolding obstetric circumstance and clinical indications), but between health professionals there was no clear consensus as to what they believed to be clinical indications across time (i.e. breech), place (i.e. availability and access) and parity (i.e. women with a previous CS). Some senior doctors and midwives expressed concerns that less experienced staff are more likely to perform CS based on vague indications and spoke favourably about wanting junior staff to consult them more for a second opinion. Other senior staff suggested second opinion policies only work where both doctors are in attendance at the hospital. While some residents also reported wanting improved communication, they feared seeking a second opinion would negatively impact their clinical credibility and career.                                                          | 1-2, 4-5,13,17                         | Minor concerns regarding methodological limitations in 4 studies and moderate concerns in 2 of 6 studies from across resource settings.           | Major concerns about coherence with contradictions in available data. It is unclear as to what extent this is because the nature and extent of life-threatening clinical indications actually differs. | Major concerns regarding adequacy with limited, thin data from different resource settings.                                                                             | Minor concerns regarding relevance with 3 studies from HIC, 1 MIC and 2 LICs.                                                                  | Low confidence      | 6 studies with minor to moderate methodological limitations. Thin data, with major concerns about coherence across settings.                                                                                                                                             |
| <b>Beliefs about the evidence-base surrounding caesarean section:</b> Health professionals' views about research evidence varied. Most health professionals recognised that guidelines represent the national or international evidence-base, which sensitised them to reflect on their practice, providing a potential mechanism for change. Most health professionals wanted more evidence of transferability to their own practice context, particularly in MIC and LIC contexts, where audit was not common. Not all health professionals believed available evidence to be valid, applicable to their practice, or feasible to implement, and spoke about keeping-up-to-date with the latest evidence as challenging. Across resource settings obstetricians and midwives expressed concerns about evidence of risks associated with CS as incomplete. Some health professionals who valued guidelines were also                                                                                                                                                               | 1-2, 4-5, 9-11, 14-15, 17              | Minor concerns regarding methodological limitations in 6 studies and moderate concerns in 4 studies.                                              | Minor concerns about coherence with clear patterns identified across studies. Less confidence in LICs.                                                                                                 | Moderate concerns regarding adequacy with thick data from HICs and MICs, but very thin, limited data from LICs.                                                         | Moderate concerns regarding relevance with 6 studies from HIC, 3 from MIC, and only one 1 study from LICs contributing to this review finding. | Moderate confidence | 10 studies with minor to moderate methodological limitations. Rich data from across 3 geographical regions but limited data from LICs. High coherence across HICs and MICs. Uncertain confidence in LICs.                                                                |



|                                                                                                                                                                                                                                                                                                                                                                                                                                                                                                                                                                                                                                                                                                                                                                                                                                                                                                                                                                                                                                                                                                                                                                                                                                                                                                               |                    |                                                                                                            |                                                                                                                                                                                                                               |                                                                                                                             |                                                                                                                              |                     |                                                                                                                                                                                         |
|---------------------------------------------------------------------------------------------------------------------------------------------------------------------------------------------------------------------------------------------------------------------------------------------------------------------------------------------------------------------------------------------------------------------------------------------------------------------------------------------------------------------------------------------------------------------------------------------------------------------------------------------------------------------------------------------------------------------------------------------------------------------------------------------------------------------------------------------------------------------------------------------------------------------------------------------------------------------------------------------------------------------------------------------------------------------------------------------------------------------------------------------------------------------------------------------------------------------------------------------------------------------------------------------------------------|--------------------|------------------------------------------------------------------------------------------------------------|-------------------------------------------------------------------------------------------------------------------------------------------------------------------------------------------------------------------------------|-----------------------------------------------------------------------------------------------------------------------------|------------------------------------------------------------------------------------------------------------------------------|---------------------|-----------------------------------------------------------------------------------------------------------------------------------------------------------------------------------------|
| very clear they took other factors into account in actual decision-making (i.e. interpersonal relationships, patient's unique characteristics).                                                                                                                                                                                                                                                                                                                                                                                                                                                                                                                                                                                                                                                                                                                                                                                                                                                                                                                                                                                                                                                                                                                                                               |                    |                                                                                                            |                                                                                                                                                                                                                               |                                                                                                                             |                                                                                                                              |                     |                                                                                                                                                                                         |
| <b>Fear of blame and recrimination (including medico-legal concerns):</b> Across HIC, MIC and LICs health professionals reported fear of litigation as an important influence on their low threshold for performing CS (although no-one had actual experience of litigation in LIC). Predominantly in North America health professionals described medico-legal concerns as an underlying factor in non-compliance to guideline recommendations. Across urban and rural settings with or without 24-hour obstetrical and anaesthesia coverage, obstetricians and midwives weighed up the balance of professional identity risk with not intervening, a poor outcome ensuing and a medico-legal case against them. Also in North America some obstetricians were opposed to second-opinion policies because of the difficulties in medico-legal responsibilities that could ensue. In North America, some European countries and Africa, midwives and obstetricians expressed concerns about threats to their professional identity and career prospects posed by internal audit and feedback. A few health professionals welcomed guidelines as providing a defensible basis for their practice, while other midwives and obstetricians were undeterred in their commitment to intervene only when necessary. | 1-2, 5-7, 11,13,15 | No concerns regarding methodological limitations in 6 studies and minor to moderate concerns in 2 studies. | Moderate concerns about coherence as fear of blame is a cogent finding across studies but the influence of actual experience of litigation on preference for CS is unclear in MICs and HICs, and no actual experience in LIC. | Moderate concerns regarding adequacy with fairly thick data from USA, UK, Iran, Nicaragua, and Tanzania.                    | Moderate concerns regarding relevance with 8 studies from HIC (4), MIC (3), and LIC (1) contributing to this review finding. | Moderate confidence | 8 studies, with no to moderate methodological limitations. Rich data from 5 countries. Moderate coherence.                                                                              |
| <b>Value attached to financial rewards associated with CS:</b> Some health professionals were outspoken about the economic incentives for CSs, particularly in private healthcare facilities. This included doctors in Tanzania, Iran, China and Nicaragua, as well as midwives in Iran and the USA. Some doctors considered CS to involve more work, which justified the payment; others blamed the system, while others still reported personally valuing this extra income. Some doctors, and midwives, were critical of insufficient monetary reward to staff labour and vaginal birth by comparison.                                                                                                                                                                                                                                                                                                                                                                                                                                                                                                                                                                                                                                                                                                     | 2,5-7,10-11, 13,17 | Minor concerns regarding methodological limitations in 5 studies and moderate concerns in 3 studies.       | No or very minor concerns regarding coherence. Data similar within and across countries, setting, and resource context.                                                                                                       | Moderate concerns regarding adequacy with adequate data from 5 countries and thick data from 2 countries, both MIC.         | Minor concerns regarding relevance with 8 studies from 3 HICs, 4 MICs and 1 LIC.                                             | Moderate confidence | 8 studies with minor to moderate methodological limitations. Rich data predominantly from middle-income countries. High coherence.                                                      |
| <b>Preferences for CS as convenient:</b> Health professionals valued both the scheduling CS offers and the lesser time commitment it entails compared with labour and vaginal birth. Some health professionals described how CS was convenience for women too (for the same reasons), although others recognised while CS might be more convenient for them, it is not what every woman wants.                                                                                                                                                                                                                                                                                                                                                                                                                                                                                                                                                                                                                                                                                                                                                                                                                                                                                                                | 5-6, 8-11, 13      | Minor concerns regarding methodological limitations in 4 studies and moderate concerns in 3 studies.       | Minor concerns regarding coherence with data similar within and across countries, setting, and resource context.                                                                                                              | Moderate concerns regarding adequacy with adequate data from 5 studies and rich data from 2 studies.                        | Moderate concerns regarding relevance with 2 studies from HICs, 4 from MICs and 1 from a LIC.                                | Moderate confidence | 7 studies with minor to moderate methodological limitations. Fairly rich data from 2 studies and convenience a theme in a third. High coherence.                                        |
| <b>Beliefs about women:</b> Across the world, health professionals reported women's demand for a particular birth method as an important factor influencing rates of CS, NVD and VBAC. Some health professionals believed women now value CS as a consumer choice (available in public and private healthcare settings), others attributed increasing rates to women's lower threshold for CS during labour. In HIC, MICs and one LIC (Tanzania), a few health professionals spoke about women's innate ability to labour and birth as being diminished by rising BMIs, advanced maternal age, sedentary lifestyles and "western diseases". Health professionals also perceived women as lacking in antenatal education, being influenced by their                                                                                                                                                                                                                                                                                                                                                                                                                                                                                                                                                            | 1-2,4-11,13-17     | Minor concerns regarding methodological limitations in 9 studies and moderate concerns in 6 studies.       | Minor concerns regarding coherence with data similar within and across countries, setting, and resource context.                                                                                                              | Minor concerns regarding adequacy with thick data, from studies across 5 world regions, HIC, MIC and LIC resource settings. | Minor concerns regarding relevance with studies of health professionals from HICs, MICs and LICs, with a range of CS rates.  | High confidence     | 15 studies with no to moderate methodological limitations. Thick data from 15 countries, across 5 world regions, high-, middle- and low-income settings with high CSRs. High coherence. |

|                                                                                                                                                                                                                                                                                                                                                                                                                                                                                                                                                                                                                                                                                                                                                                                                                                                                                                                                                                                                |                     |                                                                                                                                 |                                                                                                              |                                                                                                                                                                 |                                                                                                                                           |                     |                                                                                                                                                                                                                 |
|------------------------------------------------------------------------------------------------------------------------------------------------------------------------------------------------------------------------------------------------------------------------------------------------------------------------------------------------------------------------------------------------------------------------------------------------------------------------------------------------------------------------------------------------------------------------------------------------------------------------------------------------------------------------------------------------------------------------------------------------------------------------------------------------------------------------------------------------------------------------------------------------------------------------------------------------------------------------------------------------|---------------------|---------------------------------------------------------------------------------------------------------------------------------|--------------------------------------------------------------------------------------------------------------|-----------------------------------------------------------------------------------------------------------------------------------------------------------------|-------------------------------------------------------------------------------------------------------------------------------------------|---------------------|-----------------------------------------------------------------------------------------------------------------------------------------------------------------------------------------------------------------|
| families, and the plethora of information about birth available in the media and on-line.                                                                                                                                                                                                                                                                                                                                                                                                                                                                                                                                                                                                                                                                                                                                                                                                                                                                                                      |                     |                                                                                                                                 |                                                                                                              |                                                                                                                                                                 |                                                                                                                                           |                     |                                                                                                                                                                                                                 |
| <p><b>Beliefs about need for high-level infrastructures:</b> Health professionals in HICs who were supportive of VBAC were flexible in their interpretation of guidelines and used them and available technologies in a facilitative way. Other health professionals, predominantly from MICs and LICs, but some from HICs, expressed concerns that a lack of human and technological resource made guideline recommendations unworkable in practice. In HICs where 24-hour obstetrical and anaesthesia cover was available, some health professionals reported women were still refused a trial of labour.</p>                                                                                                                                                                                                                                                                                                                                                                                | 1-2,4-6,9-17        | No or minor concerns regarding methodological limitations in 10 studies and moderate concerns in 4 of 14 studies.               | Moderate concerns regarding coherence. Variations in the data apparent within and between resource settings. | Moderate concerns regarding adequacy. Data from 5 world regions, including 17 countries, with thick data from 10 studies in HICs and MICs. Thin data from LICs. | Minor concerns regarding relevance. (No studies from China contributed to the finding but population policy 1979-2016 means not relevant) | Moderate confidence | 14 studies with no to moderate methodological limitations. Thick data from HICs and MICs. The finding may have higher confidence in settings where the level of resource is sufficient to sustain necessary CS. |
| <p><b>Beliefs about the clinical encounter and autonomous decision-making:</b> Obstetricians and midwives views varied as to who they thought should have the final say in the decision to perform a CS. Some health professionals accepted a woman's right to choose CS, many thought the decision should be shared, while others believed the decision could only be made by health professionals qualified to do so. Some health professionals expressed concern time constraints in practice limited their opportunities to facilitate informed decision-making. Where teams had a shared approach they reported informed decision-making did happen and irrespective of who made the final decision everyone involved was reassured by the process.</p>                                                                                                                                                                                                                                   | 1-3,5-9,11-14,16-17 | No or minor concerns regarding methodological limitations in 9 studies and moderate to significant concerns in 5 of 14 studies. | Minor concerns regarding coherence.                                                                          | Moderate concerns regarding adequacy. Thick data from 5 world regions, across 8 HICs, 5 MICs and one LIC.                                                       | Moderate concerns regarding relevance with only one study from a LIC (Tanzania).                                                          | Moderate confidence | 14 studies with no to significant methodological limitations. Thick data from HICs, MICs and one LIC. High coherence.                                                                                           |
| <p><b>Organisation of care:</b> Across the world, health professionals perceived the maternity care system as insufficiently resourced (human and material). Midwives and Obstetricians reported where CS was an important source of revenue operating facilities were a priority, and facilities for labouring women were poor and inadequately staffed.</p>                                                                                                                                                                                                                                                                                                                                                                                                                                                                                                                                                                                                                                  | 2,4-6,9,11-13,15,17 | No or minor concerns regarding methodological limitations in 7 studies and moderate concerns in 3 of 10 studies.                | Minor concerns regarding coherence.                                                                          | Moderate concerns regarding adequacy. Thin data from 4 world regions, across predominantly HICs.                                                                | Moderate concerns regarding relevance.                                                                                                    | Moderate confidence | 10 studies with no to moderate methodological limitations. Thin data from 13 countries, and thick data from Iran. High coherence.                                                                               |
| <p><b>Belief in need to reduce unnecessary CS and receptiveness to change:</b> Across resource settings health professionals reported concerns about high CS rates and associated morbidity. In Iran and Tanzania some health professionals spoke about colleagues who performed CS for non-medical reasons as contravening medicines underlying ethical principle to do no harm. In European settings, health professionals experienced interventions targeted to reduce unnecessary CS as most acceptable where this vision was shared within and between multi-disciplinary groups. In the UK and Scandinavia, health professionals from organisations that achieved success in reducing rates had positive attitudes towards critical self-reflection (including audit, second opinion and continuing medical education) and felt supported by colleagues and opinion leaders. Across resource settings health professionals acknowledged concerted action to reduce unnecessary CS as</p> | 1-2,5-6,9,11-14     | No or minor concerns regarding methodological limitations in 7 studies and moderate concerns in 2 of 9 studies.                 | Minor concerns regarding coherence with similar data across studies.                                         | Moderate concerns regarding adequacy. Thick data from 3 world regions, and thin data from African region (1 study).                                             | Moderate concerns regarding relevance with no included studies from China.                                                                | Moderate confidence | 9 studies with no to moderate methodological limitations. Thick data from Europe. Only one study from African region contributed to this finding. High coherence.                                               |

|                                                                                                                                                                                                                                                                                                                                                                                                                                                                                                                                                                                                                                                                                                                                                                                                                                                                                                                                                                   |                    |                                                                                                                                             |                                                                                                                           |                                                                                                                                                   |                                                                                |                     |                                                                                                                         |
|-------------------------------------------------------------------------------------------------------------------------------------------------------------------------------------------------------------------------------------------------------------------------------------------------------------------------------------------------------------------------------------------------------------------------------------------------------------------------------------------------------------------------------------------------------------------------------------------------------------------------------------------------------------------------------------------------------------------------------------------------------------------------------------------------------------------------------------------------------------------------------------------------------------------------------------------------------------------|--------------------|---------------------------------------------------------------------------------------------------------------------------------------------|---------------------------------------------------------------------------------------------------------------------------|---------------------------------------------------------------------------------------------------------------------------------------------------|--------------------------------------------------------------------------------|---------------------|-------------------------------------------------------------------------------------------------------------------------|
| challenging, but achievable and intrinsically rewarding where there was respect, accountability, and shared responsibility to support women achieve a vaginal birth.                                                                                                                                                                                                                                                                                                                                                                                                                                                                                                                                                                                                                                                                                                                                                                                              |                    |                                                                                                                                             |                                                                                                                           |                                                                                                                                                   |                                                                                |                     |                                                                                                                         |
| <b>Views about the format, content and delivery of interventions:</b> A few health professionals spoke about the importance of the tone of guidance as facilitative of reflection, not dictatorial, judgemental or threatening, at the same time as being clear about the need for change by avoiding the use of words such as 'should', 'developmental' or 'pilot.' Some health professionals described how important it was for local opinion leaders to endorse projects, and where external facilitators were involved they are 'credible' and 'grounded', exercised cultural humility, and understand the challenges within specific practice settings. In some HICs, health professionals talked about multi-disciplinary /inter-professional team involvement meaning representatives from medicine (obstetrics, anaesthesia, paediatrics), nursing and midwifery, allied health professionals, quality, health records, and scheduling in secondary care. | 2,5,9,11-13        | No or minor concerns regarding methodological limitations in 4 studies and moderate to significant concerns in 2 studies of 6 total studies | Moderate concerns about coherence with similarities and contradictions in available data.                                 | Major concerns regarding adequacy with thick data from one UK study. Data from 4 regions and across resource settings is thin.                    | Minor concerns regarding relevance with 3 studies from HICs, 2 MICs and 1 LIC. | Low confidence      | 6 studies with minor to significant methodological limitations. Thick data from one study. Extent of coherence unclear. |
| <b>Reluctance to change based on lack of training, skills or experience:</b> Some health professionals spoke about how pre-and post-registration training has ill-equipped the next generation for a reduction in CS rates as they have little experience, competency or confidence in normal labour and vaginal birth. Others reported wanting specific training on recommendations to make them more acceptable in practice. Reasons for many health professionals lack of buy-in was multifactorial - see also Organisation of care; Beliefs about need for complex infrastructure; and Beliefs about the clinical encounter and autonomous decision-making.                                                                                                                                                                                                                                                                                                   | 2,4-5,7,9,11,15-17 | No or minor concerns regarding methodological limitations in 5 studies and moderate concerns in 4 studies of 9 total studies.               | Moderate concerns regarding coherence with similar, but thin data across studies, and overlap with other emergent themes. | Major concerns regarding adequacy with thick data from one Iranian study. Data from 5 regions and across resource settings is thin.               | Minor concerns regarding relevance with 5 studies from HICs, 3 MICs and 1 LIC. | Low confidence      | 9 studies with minor to significant methodological limitations. Thick data from one study. Extent of coherence unclear. |
| <b>Dysfunctional teamwork, within the medical profession and including the marginalization of midwives:</b> Health professionals reported dysfunctional teamwork within and between professionals as an important barrier to reducing unnecessary CS rates. Medicine's entrenched hierarchies, lack of communication between maternity and theatre staff, and difficult relationships between obstetricians, midwives and family doctors were all spoken about. Some midwives and obstetricians spoke passionately about the marginalization of midwives and their exclusion from birth as counterproductive.                                                                                                                                                                                                                                                                                                                                                     | 2,4-6,9-13, 15,17  | No or minor concerns regarding methodological limitations in 7 studies and moderate concerns in 4 studies of 11 total studies.              | Minor concerns regarding coherence with similar data across studies.                                                      | Moderate concerns regarding adequacy with thin data from 8 studies and rich data from 3 studies across resource settings (UK, Iran and Tanzania). | Minor concerns regarding relevance with 6 studies from HICs, 3 MICs and 2 LIC. | Moderate confidence | 11 studies with minor to moderate methodological limitations. Thick data from across resource settings. High coherence. |

## References

1. Kamal P, Dixon-Woods M, Kurinczuk JJ, Oppenheimer C, Squire P, Waugh J. Factors influencing repeat caesarean section: qualitative exploratory study of obstetricians' and midwives' accounts. *BJOG*, 2005, 112: 1054-1060.
2. Chaillet N, Dube E, Dugas M, Francoeur D, Dube J, Gagon S, Poitras, Dumont A. Identifying barriers and facilitators towards implementing guidelines to reduce caesarean section rates in Quebec. *Bulletin of the World Health Organization*.2007 85;10:791-797.
3. Chen Y, Lu W, Zhang YF. Informed choice and autonomy of decision making on caesarean section in China. *Maternal and Child Health Care of China* 2008; 23: 89-92. (Chinese).
4. Wanyonyi SZ, Mukaindo AM, Stones W. Perspectives on the practice of vaginal birth after caesarean section in East Africa. *East African Medical Journal*. 2010, 87 (8): 335-339.
5. Yazdizadeh B, Nedjat S, Mohammad K, Rashidian A, Changizi N, Majdzadeh R. Cesarean section rate in Iran, multidimensional approaches for behavioral change of providers: a qualitative study. *BMC Health Services Research* 2011, 11:159.
6. Cox KJ. Providers' perspectives on the vaginal birth after cesarean guidelines in Florida, United States: a qualitative study. *BMC Pregnancy and Childbirth* 2011, 11:72.
7. Liu L, Tao FB, Huang K. Qualitative study on affecting factors of continuing increasing in caesarean section rate in rural area. *Modern Preventive Medicine* 2010 37(20):3865-9. (Chinese).
8. Wang N, Ding Y. Reasons for obstetric medial staff choosing cesarean section for themselves in the absence of medical indications: a qualitative study. *Journal of Nursing Science* 2013; 28(6): 39-41. (Chinese).
9. Dunn S, Sprague AE, Fell DB, Dy J, Harrold JA, Lamontagne B, Walker M. The Use of a Quality Indicator to Reduce Elective Repeat Caesarean Section for Low-Risk Women Before 39 Weeks' Gestation: The Eastern Ontario Experience. *J Obstet Gynaecol Can* 2013;35(4):306-316.
10. Lotfi R, Tehrani FR, Dovom MR, Torkestani F, Abedini M, Sajedinejad S. Development of strategies to reduce cesarean delivery rates in Iran 2012-2014: a mixed methods study. *Int J Prev Med* 2014, 5 (12):1552-1556.
11. Colomar M, Cafferata ML, Aleman A, Castellano G, Elorrio EG, Althabe F, Engelbrecht S. Mode of Childbirth in Low-Risk Pregnancies: Nicaraguan Physicians' Viewpoints. *Matern Child Health J*. 2014, 18:2382-2392.
12. Marshall JL, Spilby H, McCormick F. Evaluating the 'Focus on Normal Birth and Reducing Caesarean section Rates Rapid Improvement Programme': A mixed method study in England. *Midwifery*. 2015, 31: 332-340.
13. Litorp H, Mgaya A, Mbekenga CK, Kidanto HL, Johnsdotter S, Essen B. Fear, blame and transparency: obstetric caregivers' rationale for high caesarean section rates in low-resource setting. *Soc Sci Med*. 2015. 143:232-240.
14. Lundgren I, Limbeek E, Vehvilainen-Julkunen, Nilsson C. Clinicians' views of factors of importance for improving the rate of VBAC (vaginal birth after caesarean section): a qualitative study from countries with high VBAC rates. *BMC Pregnancy and Childbirth*. 2015,15:196.
15. Lungren I, Healy P, Carroll M, Begley C, Mattered A, Gross MM, Grylka-Baeschlín S, Nicoletti J, Morano S, Nilsson, Lalor J. Clinicians' views of factors of importance for improving the rate of VBAC (vaginal birth after caesarean section): a study from countries with low VBAC rates. *BMC Pregnancy and childbirth*. 2016, 16:350.
16. Foureur M, Turkmani S, Clack DS, Davis DL, Mollart L, Leiser B, Homer CSE. Caring for women wanting a vaginal birth after previous caesarean section: A qualitative study of the experiences of midwives and obstetricians. *Women and Birth* 2017, 30:3-8.
17. Melman S, Schreurs RHP, Dirksen CD, Kwee A, Nijhuis JG, Smeets NAC, Scheepers HJC, Hermens RPMG. Identification of barriers and facilitators for optimal caesarean section care: perspective of professionals. *BMC Pregnancy and Childbirth*. 2017, 17:230.

## Supplementary appendix: Table 2 Summary of studies used to test line of argument synthesis

| Authors, year                                                                                                                                           | Aim                                                                                                                                                                                                                                                                                                               | Country (Region)             | Resource | Setting         | Number of participants                                                                                 | Method                                      | Quality assessment |
|---------------------------------------------------------------------------------------------------------------------------------------------------------|-------------------------------------------------------------------------------------------------------------------------------------------------------------------------------------------------------------------------------------------------------------------------------------------------------------------|------------------------------|----------|-----------------|--------------------------------------------------------------------------------------------------------|---------------------------------------------|--------------------|
| <i>What health professionals say about the feasibility of interventions to reduce unnecessary interventions in childbirth and increase normal birth</i> |                                                                                                                                                                                                                                                                                                                   |                              |          |                 |                                                                                                        |                                             |                    |
| Binfa (2016)                                                                                                                                            | To explore professionals' perceptions (obstetricians and midwives), as well as consumers' perceptions of this humanised assistance during labour and childbirth                                                                                                                                                   | Chile (Americas)             | Middle   | Rural and urban | 40 Midwives and 29 obstetricians                                                                       | Focus groups                                | Not assessed       |
| Binfa (2013)                                                                                                                                            | To explore the perception of this humanised attention during labour and delivery by both the professional staff (obstetricians and midwives) and consumers                                                                                                                                                        | Chile (Americas)             | Middle   | Urban           | Unclear (6 focus groups and 2 in-depth interviews involving women, health professionals and Directors) | Focus groups and in-depth interviews        | Not assessed       |
| Janani (2015)                                                                                                                                           | To explore challenges in implementing the PBP from perspective of midwives and obstetricians that provide maternity care                                                                                                                                                                                          | Iran (Eastern Mediterranean) | Middle   | Urban           | 32 midwives and 6 obstetricians                                                                        | Focus groups and semi-structured interviews | Not assessed       |
| Kennedy (2016)                                                                                                                                          | To investigate facilitators and barriers to the achievement of primary vaginal birth in first-time mothers in hospital settings                                                                                                                                                                                   | USA (Americas)               | High     | Urban           | 18 Registered Nurses, 8 Midwives, 26 Obstetricians, 3 Paediatricians, 6 Anaesthetists                  | Individual or small group interviews        | Not assessed       |
| Darling (2016)                                                                                                                                          | To seek the views of midwives about the usefulness and relevance of the Keeping Birth Normal tool in measuring and supporting practice, and barriers to implementation                                                                                                                                            | UK (European)                | High     | Urban           | 9 Midwives                                                                                             | Semi-structured interviews                  | Not assessed       |
| Kerrigan (2015)                                                                                                                                         | To explore practitioners' experiences of and strategies for providing intrapartum care to obese women to inform the develop of an intervention to promote normal birth                                                                                                                                            | UK (European)                | High     | Urban           | 6 Consultant Obstetricians, 2 Consultant Anaesthetists, 16 midwives                                    | Focus groups and individual interviews      | Not assessed       |
| Cheyne (2013)                                                                                                                                           | To explore and explain the ways in which the Keeping childbirth Natural and Dynamic (KCND) programme worked or did not work in different maternity care contexts                                                                                                                                                  | UK (European)                | High     | Rural and urban | 73 Health Professionals                                                                                | Semi-structured interviews and focus groups | Not assessed       |
| Hunter (2014, 2010a,2010b)                                                                                                                              | To explore how the All Wales Clinical Pathway for normal labour was developed and used in real life settings and evaluate its implementation from the perspectives of all key players: midwives, doctors, mothers and midwifery managers                                                                          | UK (European)                | High     | Rural and urban | 41 midwives, 5 midwifery managers, 6 doctors                                                           | Observation, focus groups and interviews    | Not assessed       |
| Behruzi (2010)                                                                                                                                          | To explore the Japanese child birthing experience in different birth settings where the humanization of childbirth has been identified among the priority goals of the institutions concerned, and also to explore the obstacles and facilitators encountered in the practice of humanized birth in those centres | Japan (Western Pacific)      | High     | Urban           | 44 Health professionals                                                                                | Semi-structured interviews and focus groups | Not assessed       |
| Kennedy (2013, 2010)                                                                                                                                    | To identify factors that foster or hinder the support of normal birth and elective caesarean delivery                                                                                                                                                                                                             | UK (European)                | High     | Urban           | 34 clinicians (midwifery, obstetric, anaesthesia)                                                      | Interviews and observations                 | Not assessed       |

| <i>How health professionals perceive women's choice of delivery mode and the feasibility of reducing unnecessary CSs</i>                                                                                                                                                                                                                                                                                                                                                                                                                                                                                                                                                                                                                                                                                                                                                                                                                                                                                                                                                                                                                                                                                                                                                                                                                                                                                                                                                                                                                                                                                                                                                                                                                                                                                                                                                                                                                                                                                                                                                                                                                                                                                                                                                                                                                                                                                                                                                                                                                                                                                                                                                                                                                                                                                                                                                                                                                                                                                                                                                                                                                                                                                                                                                                                                                                                                                                    |                                                                                                                                                     |                              |        |                 |                                                                 |                            |              |
|-----------------------------------------------------------------------------------------------------------------------------------------------------------------------------------------------------------------------------------------------------------------------------------------------------------------------------------------------------------------------------------------------------------------------------------------------------------------------------------------------------------------------------------------------------------------------------------------------------------------------------------------------------------------------------------------------------------------------------------------------------------------------------------------------------------------------------------------------------------------------------------------------------------------------------------------------------------------------------------------------------------------------------------------------------------------------------------------------------------------------------------------------------------------------------------------------------------------------------------------------------------------------------------------------------------------------------------------------------------------------------------------------------------------------------------------------------------------------------------------------------------------------------------------------------------------------------------------------------------------------------------------------------------------------------------------------------------------------------------------------------------------------------------------------------------------------------------------------------------------------------------------------------------------------------------------------------------------------------------------------------------------------------------------------------------------------------------------------------------------------------------------------------------------------------------------------------------------------------------------------------------------------------------------------------------------------------------------------------------------------------------------------------------------------------------------------------------------------------------------------------------------------------------------------------------------------------------------------------------------------------------------------------------------------------------------------------------------------------------------------------------------------------------------------------------------------------------------------------------------------------------------------------------------------------------------------------------------------------------------------------------------------------------------------------------------------------------------------------------------------------------------------------------------------------------------------------------------------------------------------------------------------------------------------------------------------------------------------------------------------------------------------------------------------------|-----------------------------------------------------------------------------------------------------------------------------------------------------|------------------------------|--------|-----------------|-----------------------------------------------------------------|----------------------------|--------------|
| Huang (2013)                                                                                                                                                                                                                                                                                                                                                                                                                                                                                                                                                                                                                                                                                                                                                                                                                                                                                                                                                                                                                                                                                                                                                                                                                                                                                                                                                                                                                                                                                                                                                                                                                                                                                                                                                                                                                                                                                                                                                                                                                                                                                                                                                                                                                                                                                                                                                                                                                                                                                                                                                                                                                                                                                                                                                                                                                                                                                                                                                                                                                                                                                                                                                                                                                                                                                                                                                                                                                | To determine the population based CS rates in two counties in rural China and explore the factors associated with choice for CS as mode of delivery | China (Western Pacific)      | Middle | Rural           | n=58 Unclear how many Health Professionals - at least 2 doctors | Focus Groups               | Not assessed |
| Bagheri (2013)                                                                                                                                                                                                                                                                                                                                                                                                                                                                                                                                                                                                                                                                                                                                                                                                                                                                                                                                                                                                                                                                                                                                                                                                                                                                                                                                                                                                                                                                                                                                                                                                                                                                                                                                                                                                                                                                                                                                                                                                                                                                                                                                                                                                                                                                                                                                                                                                                                                                                                                                                                                                                                                                                                                                                                                                                                                                                                                                                                                                                                                                                                                                                                                                                                                                                                                                                                                                              | To explore obstetrician's views of what might influence pregnant women's choice of delivery method.                                                 | Iran (Eastern Mediterranean) | Middle | Urban           | 18 physicians                                                   | Semi-structured interviews | Not assessed |
| Weaver (2007)                                                                                                                                                                                                                                                                                                                                                                                                                                                                                                                                                                                                                                                                                                                                                                                                                                                                                                                                                                                                                                                                                                                                                                                                                                                                                                                                                                                                                                                                                                                                                                                                                                                                                                                                                                                                                                                                                                                                                                                                                                                                                                                                                                                                                                                                                                                                                                                                                                                                                                                                                                                                                                                                                                                                                                                                                                                                                                                                                                                                                                                                                                                                                                                                                                                                                                                                                                                                               | To examine whether, and in what context, maternal requests for caesarean section are made                                                           | UK (European)                | High   | Rural and urban | 29 Obstetricians (consultants and registrars)                   | Semi-structured Interviews | Not assessed |
| <b>References</b>                                                                                                                                                                                                                                                                                                                                                                                                                                                                                                                                                                                                                                                                                                                                                                                                                                                                                                                                                                                                                                                                                                                                                                                                                                                                                                                                                                                                                                                                                                                                                                                                                                                                                                                                                                                                                                                                                                                                                                                                                                                                                                                                                                                                                                                                                                                                                                                                                                                                                                                                                                                                                                                                                                                                                                                                                                                                                                                                                                                                                                                                                                                                                                                                                                                                                                                                                                                                           |                                                                                                                                                     |                              |        |                 |                                                                 |                            |              |
| <ol style="list-style-type: none"> <li>1. Binfa L, Pantoja L, Ortiz J, Gurovich M, Cavada G. Assessment of the implementation of the model of integrated and humanised midwifery health services in Santiago. <i>Midwifery</i> 2013;29:1151-1157.</li> <li>2. Binfa L, Pantoja L, Ortiz J, Gurovich M, Cavada G, Foster J. Assessment of the implementation of the model of integrated and humanised midwifery health services in Chile. <i>Midwifery</i>. 2016;35:53-61</li> <li>3. Janani F, Kohan S, Taleghani F, Ghafarzadeh M. Challenges to implementing physiologic birth program (PBP): A qualitative study of midwives' opinions in Iran. <i>Acta Medica Mediterranea</i> 2015;31:1373</li> <li>4. Kennedy HP, Doig E, Tillman S, Straus A, Williams B, Pettker C, Illuzzi J. Perspectives on Promoting Hospital Primary Vaginal Birth: A Qualitative Study. <i>BIRTH</i> 2016;43:336-345</li> <li>5. Darling F. Practitioners' views and barriers to implementation of the keeping birth normal tool: A pilot study. <i>BJM</i> 2016. <a href="https://doi.org/10.12968/bjom.2016.24.7.508">https://doi.org/10.12968/bjom.2016.24.7.508</a></li> <li>6. Kerrigan A, Kingdon C, Cheyne H. Obesity and normal birth: A qualitative study of clinician's management of obese pregnant women during labour. <i>BMC Pregnancy and Childbirth</i> 2015;15:256.</li> <li>7. Cheyne H, Abhyankar P, McCourt C. Empowering change: Realist evaluation of a Scottish Government programme to support normal birth. <i>Midwifery</i> 2013;29:1110-1121.</li> <li>8. Hunter B. Implementing a National Policy Initiative to Support Normal Birth: Lessons from the All Wales Clinical Pathway for Normal Labour. <i>J Midwifery Womens Health</i> 2010;55:226-233.</li> <li>9. Hunter B, Segrott J. Using a Clinical Pathway to Support Normal Birth: Impact on Practitioner Roles and Working Practices. <i>BIRTH</i> 2010;37:227-235</li> <li>10. Hunter B, Segrott J. Renegotiating inter-professional boundaries in maternity care: implementing a clinical pathway for normal labour. <i>Sociology of Health &amp; Illness</i> 2014;36:719-737.</li> <li>11. Behuruze R, Hatem M, Fraser W, Goulet L, li M, Misago C. Facilitators and barriers in the humanization of birth in Japan. <i>BMC Pregnancy and Childbirth</i> 2010;10:25</li> <li>12. Kennedy HP, Grant J, Walton C, Shaw-Battista J, Sandall J. Normalizing birth in England: A qualitative study. <i>Journal of Midwifery and Women's Health</i> 2010;55: 262-269.</li> <li>13. Kennedy HP, Grant J, Sandall J. Elective caesarean delivery: A mixed-method qualitative investigation. <i>Midwifery</i> 2013;29:e138-e144</li> <li>14. Huang K, Tao FB, Faragher B, Raven J, Tolhurst R, Tang S, van den Broek N. A mixed-method study of factors associated with differences in caesarean section rates at community level: The case of rural China. <i>Midwifery</i> 2013;29(8): 911-20.</li> <li>15. Bagheri A, Masoudi Alavi N, Abbaszadeh F. Iranian obstetricians' views about the factors that influence pregnant women's choice of delivery method: A qualitative study. <i>Women and birth</i> 2013;26(1):e45-9.</li> <li>16. Weaver JJ, Statham H, Richards M. Are there "unnecessary" caesarean sections? Perceptions of women and obstetricians about caesarean sections for non-clinical indications. <i>BIRTH</i> 2007;34:32-41.</li> </ol> |                                                                                                                                                     |                              |        |                 |                                                                 |                            |              |



1  
2  
3  
4  
5  
6  
7  
8  
9  
10  
11  
12  
13  
14  
15  
16  
17  
18  
19  
20  
21  
22  
23  
24  
25  
26  
27  
28  
29  
30  
31  
32  
33  
34  
35  
36  
37  
38  
39  
40  
41  
42  
43  
44  
45  
46  
47  
48  
49  
50  
51  
52  
53  
54  
55  
56  
57  
58  
59  
60

Figure 2: Thematic schema of effect

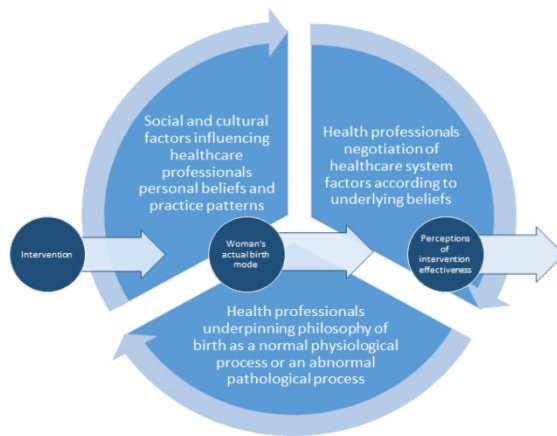

279x215mm (300 x 300 DPI)

# BMJ Open

## Interventions targeted at health professionals to reduce unnecessary caesarean sections: A qualitative evidence synthesis

|                                 |                                                                                                                                                                                                                                    |
|---------------------------------|------------------------------------------------------------------------------------------------------------------------------------------------------------------------------------------------------------------------------------|
| Journal:                        | <i>BMJ Open</i>                                                                                                                                                                                                                    |
| Manuscript ID                   | bmjopen-2018-025073.R1                                                                                                                                                                                                             |
| Article Type:                   | Research                                                                                                                                                                                                                           |
| Date Submitted by the Author:   | 10-Oct-2018                                                                                                                                                                                                                        |
| Complete List of Authors:       | Kingdon, Carol; University of Central Lancashire, ReaCH group<br>Downe, Soo; University of Central Lancashire, research in childbirth and health<br>Betran, Ana Pilar; World Health Organization, Reproductive Health and Research |
| <b>Primary Subject Heading</b>: | Obstetrics and gynaecology                                                                                                                                                                                                         |
| Secondary Subject Heading:      | Qualitative research                                                                                                                                                                                                               |
| Keywords:                       | caesarean section, QUALITATIVE RESEARCH, health professionals views, over treatment                                                                                                                                                |
|                                 |                                                                                                                                                                                                                                    |

SCHOLARONE™  
Manuscripts

1  
2  
3 **Interventions targeted at health professionals to reduce**  
4  
5 **unnecessary caesarean sections: A qualitative evidence synthesis**  
6  
7  
8  
9  
10  
11

12 **Corresponding Author**  
13

14 Dr Carol Kingdon, Senior Research Fellow,  
15  
16 School of Community Health and Midwifery, Faculty of Health and Wellbeing,  
17  
18 University of Central Lancashire, Preston, United Kingdom. PR1 2HE  
19

20  
21 Tel: 07935744004  
22

23 [ckingdon@uclan.ac.uk](mailto:ckingdon@uclan.ac.uk)  
24  
25  
26  
27

28 **Co-authors**  
29

30 Professor Soo Downe, Professor of Midwifery,  
31  
32 School of Community Health and Midwifery, Faculty of Health and Wellbeing,  
33  
34 University of Central Lancashire Preston, United Kingdom. PR1 2HE  
35

36 [sdowne@ulcan.ac.uk](mailto:sdowne@ulcan.ac.uk)  
37  
38  
39  
40

41 Dr. Ana Pilar Betran, Medical Officer,  
42  
43 Department of Reproductive Health and Research, World Health Organization  
44  
45 (WHO), Geneva, Switzerland.  
46

47 [betrana@who.int](mailto:betrana@who.int)  
48  
49  
50

51 **Manuscript word count: 4,572**  
52  
53  
54  
55  
56  
57  
58  
59  
60

## Abstract

**Objective:** To establish the views and experiences of healthcare professionals in relation to interventions targeted at them to reduce unnecessary caesareans.

**Design:** Qualitative evidence synthesis

**Setting:** Studies undertaken in high-, middle- and low-income settings.

**Data sources:** Seven databases (CINAHL, MEDLINE, PsychINFO, EMBASE, Global Index Medicus, POPLINE, African Journals Online). Studies published between 1985 and June 2017, with no language or geographical restrictions. We hand-searched reference lists, and key citations using Google Scholar.

**Study selection:** Qualitative or mixed-method studies reporting health professionals' views.

**Data extraction and synthesis:** Two authors independently assessed study quality prior to extraction of primary data and authors' interpretations. The data were compared and contrasted, then grouped into Summary of Findings Statements (SoFs), themes, and a line of argument synthesis. All SoFs were Confidence in the Evidence from Reviews of Qualitative research (GRADE-CERQual) assessed.

**Results:** 17 papers were included, involving 483 health professionals from 17 countries (nine high-income, six middle-income, and two low-income). Fourteen SoFs were identified, resulting in three core themes: *Philosophy of birth*(4 SoFs); 2) *Social and cultural context*(5 SoFs); and 3) *Negotiation within system*(5 SoFs). The resulting line of argument suggests three key mechanisms of effect for change or resistance to change: prior beliefs about birth; willingness or not to engage with change, especially where this entailed potential loss of income or status (including medico-legal barriers); and capacity or not to influence local community and health care service norms and values relating to caesarean provision.

**Conclusion:** For maternity care health professionals, there is a synergistic relationship between their underpinning philosophy of birth, the social and cultural context they are working within, and the extent to which they were prepared to negotiate within health system resources to reduce caesarean rates. These findings identify potential mechanisms of effect that could improve the design and efficacy of change programmes to reduce unnecessary caesareans.

1  
2  
3 **Protocol registration:** PROSPERO 2017 CRD42017059455  
4  
5

6 **Keywords:** Caesarean section, over treatment, qualitative evidence synthesis,  
7 health professionals  
8  
9

## 10 **Article summary**

### 11 **Strengths and limitations of this study**

- 14 • Our sensitive search strategy optimises the likelihood that we have identified  
15 relevant studies published in the time period in principal journals in English  
16 and other languages.
- 17 • Our findings were derived from obstetricians, midwives, and general  
18 practitioners from high, middle and low income countries, and countries with  
19 both high and low rates of caesarean section.
- 20 • Quality scores for included studies were generally high or moderate. There  
21 was high or moderate confidence on the GRADE-CERQual measure for 11  
22 Summaries of Findings.
- 23 • We only had data from one Asian country (China), one Middle Eastern country  
24 (Iran) and one South American country (Nicaragua).  
25  
26  
27  
28  
29  
30  
31  
32  
33  
34  
35

36 **Funding statement:** This work was supported by the United States Agency for  
37 International Development (USAID); and the UNDP-UNFPA-UNICEF-WHO-World  
38 Bank Special Programme of Research, Development and Research Training in  
39 Human Reproduction (HRP), a cosponsored program executed by the WHO.  
40  
41  
42  
43

44 **Competing interests statement:** "All authors have completed the ICMJE uniform  
45 disclosure form at [www.icmje.org/coi\\_disclosure.pdf](http://www.icmje.org/coi_disclosure.pdf) and declare: no support from  
46 any organisation for the submitted work; no financial relationships with any  
47 organisations that might have an interest in the submitted work in the previous three  
48 years; no other relationships or activities that could appear to have influenced the  
49 submitted work."  
50  
51  
52  
53  
54  
55  
56  
57  
58  
59  
60

## INTRODUCTION

Caesarean section (CS), can prevent deaths and serious complications in mothers and babies when indicated, but there is no evidence of benefit in the absence of clinical or psychological need.[1-3] In 2015, the World Health Organization (WHO) published a new Statement declaring that CS rates higher than 10% are not associated with reductions in mortality, and can cause surgical complications, disability or death, particularly where safe surgery cannot be conducted.[1,4] Recent figures suggest an average global CS rate of 18.6%, ranging from 6.0% to 27.2% in the lowest and highest income regions.[5] Some countries,[6] and some regions within countries,[7] now have CS rates above fifty percent. The WHO statement[1] is a call to action that resonates with other contemporary campaigns[8-9] for the reduction of medical over-diagnosis and over-treatment, to promote quality care, and to reduce iatrogenic damage and excessive health care costs.[10-11]

Debate in this area spans four decades.[4,10,12] The highest burden of CS in all income contexts occur in Robson Groups 1-5, which comprise women with singleton, term, cephalic pregnancies with or without a previous CS.[13-15] Reported reasons for rising CS rates in these groups include maternal request and the preferences and practice patterns of health professionals.[16-19] Surveys of obstetricians' personal preferences for CS report rates as high as 46% amongst US obstetricians,[20] but less than 2% amongst Flemish,[21] Norwegian[22] and Dutch obstetricians.[23] Practice patterns within and between countries vary.[24-25] Reasons include convenience and ease of undertaking a CS, risk aversion, fear of litigation in societies with growing intolerance to imperfection and in which CS is seen as a protective strategy, financial incentives, and a decline in training and skills to perform forceps and vacuum techniques.[25-27] Healthcare professionals' views of CS differ according to gender, profession and socio-clinical environment, and the dominant opinion of their relevant professional body (which can shift over time).

Existing campaigns to reduce unnecessary medical tests and treatments acknowledge that it is counter-intuitive for many health professionals to accept that their practices may be unnecessary, and that this may partly explain why



1  
2  
3 interventions targeting healthcare providers have had limited or moderate  
4 success.[10,28-29] Single or multicomponent interventions have been tested,  
5 including educational programmes and training to improve adherence to evidenced-  
6 based guidelines; second opinion policies; and audit, feedback and peer-review.  
7 However, health professionals' views are largely missing. This is a gap because  
8 understanding motivations, values and fears is essential for effective change  
9 management. The qualitative evidence synthesis presented in this paper aimed to  
10 identify, appraise and synthesize what health professionals say about interventions  
11 targeted at them to reduce unnecessary CS.  
12  
13  
14  
15  
16  
17  
18  
19

## 20 **METHODS**

21  
22 We conducted a qualitative evidence synthesis using an interpretive, modified, meta-  
23 ethnography approach.[30] The published protocol (supplementary file 1) [31]  
24 specified three objectives relating to (1) educational interventions aimed at improving  
25 adherence to evidence-based clinical practices, (2) second opinion policies, and (3)  
26 audit, feedback and peer-review (replicating the categorisation used in the Cochrane  
27 Review of non-clinical interventions to reduce unnecessary CS).[28,29] A PRISMA  
28 checklist is provided as supplementary file 2.[32]  
29  
30  
31  
32  
33  
34  
35

36 Systematic searches were conducted in March and April 2017 in CINAHL,  
37 MEDLINE, PsychINFO, EMBASE, Global Index Medicus, POPLINE, and African  
38 Journals Online. Search strategies were developed for each database using  
39 guidelines developed by the Cochrane Qualitative Research Methods Group,[33-34]  
40 and strategies for optimising the identification of qualitative studies in specific  
41 databases (example search strategy supplementary file 3).[35-38] No geographic or  
42 language restrictions were imposed. Studies from 1985 onwards were included, as  
43 this was the publication date of the first WHO statement on appropriate childbirth  
44 technology.[4] The reference lists of eligible studies were back- and forward  
45 checked.[39-40] Key articles cited by multiple authors (citation pearls) were checked  
46 on Google Scholar.[28-29,39-41] The authors of relevant published protocols were  
47 contacted.[42-43]  
48  
49  
50  
51  
52  
53  
54  
55  
56  
57  
58  
59  
60

1  
2  
3 Two review authors (CK, SD) independently assessed each abstract for inclusion.  
4 Inclusion criteria were studies: using a qualitative design or mixed methods, that  
5 used qualitative methods for data collection and analysis; in any setting where an  
6 intervention has been developed, communicated, distributed or implemented and  
7 targets health professionals; published after 1985 onwards; in any language; and a  
8 full manuscript was accessible. Exclusion criteria included clinical interventions  
9 targeted at Robson groups 6-10. The full texts of all potentially relevant papers were  
10 retrieved and independently assessed by CK and SD, and checked by APB. Three  
11 Chinese-language articles[44-46] were assessed following translation into English by  
12 a native Chinese speaker. An additional two papers were identified after the  
13 completion of this screening process, one was included[47] and one was  
14 excluded.[48]

15  
16  
17  
18  
19  
20  
21  
22  
23  
24  
25 We undertook a qualitative evidence synthesis using a modified meta-ethnography  
26 approach,[30] comprising five stages 1) Familiarisation and quality assessment, 2)  
27 Data extraction, 3) Coding into Summaries of Findings (SoFs), 4) Interpretative  
28 synthesis, including thematic analysis and creation of a line of argument synthesis, 5)  
29 Confidence in the Evidence from Reviews of Qualitative research (GRADE-CERQual)  
30 assessment of the SoFs (Supplementary file 4). In stage one, quality assessment of  
31 individual studies was independently undertaken by two authors (CK,SD) using the  
32 criteria described by Walsh [49] with studies graded as: A: No or few flaws. The  
33 study credibility, transferability, dependability, and confirmability is high; B: Some  
34 flaws, unlikely to affect the credibility, transferability, dependability, and/or  
35 confirmability of the study; C; Some flaws that may affect the credibility,  
36 transferability, dependability, and/or confirmability of the study; D: Significant flaws  
37 that are very likely to affect the credibility, transferability, dependability, and/or  
38 confirmability of the study. Whilst no studies were excluded based on the quality  
39 assessment, these assessment scores were used when judging the relative  
40 contributions of each study in the development of explanations and relationships  
41 between studies. In stage 5 of the synthesis, these quality scores were also  
42 contributory to the CERQual assessment process. GRADE-CERQual is an approach  
43 to assess the confidence in qualitative evidence synthesis findings.[50-51]  
44 Assessment was undertaken at the level of the SoFs, with each one assessed for  
45  
46  
47  
48  
49  
50  
51  
52  
53  
54  
55  
56  
57  
58  
59  
60

1  
2  
3 four criteria: methodological quality of studies underpinning the SoF, coherence  
4 across those studies, relevance to the review question, and adequacy. Based on the  
5 GRADE approach, each SoFs was initially given a high confidence rating, and then  
6 downgraded to moderate, low or very low confidence depending on the degree to  
7 which each of these criteria were not met. Peripheral studies that were theoretically  
8 relevant to the general topic, but that did not meet the full criteria for inclusion, were  
9 used to test the line of argument 'fit' (Supplementary file 5).  
10  
11  
12  
13  
14  
15

16 Reflexivity is a key component of qualitative research.[52] CK, a medical sociologist,  
17 came to the project with prior beliefs about the complexity and interdependency of  
18 social factors driving CS rates, principally informed by undertaking earlier primary  
19 research with women and health professionals in the UK.[24,53] SD, a Professor of  
20 Midwifery, has experienced the barriers clinical staff encounter when they try to use  
21 their clinical judgement and skills alongside personal values and knowledge of the  
22 current evidence base, and the views and choices of childbearing women, to decide  
23 if a particular test or treatment is appropriate for a particular mother and/or baby,  
24 rather than just applying the same rules to all regardless of need or choice. APB is a  
25 medical officer with over 15 years of experience in maternal and perinatal health  
26 research and public health and has witnessed the sense of helplessness and the  
27 barriers governments experienced when trying to reduce unnecessary CS.  
28  
29  
30  
31  
32  
33  
34  
35  
36  
37  
38

### 39 **Patient and public involvement**

40 Patients were not involved in the design or conduct of this review.  
41  
42  
43  
44  
45  
46  
47

## 48 **RESULTS**

49  
50 Seventeen studies were included from 17 countries in all WHO regions except SE  
51 Asia (Australia, Canada, China, Ethiopia, Finland, Germany, Iran, Ireland, Italy,  
52 Kenya, Netherlands, Nicaragua, Sweden, Tanzania, Uganda, UK, USA).[44-47,54-  
53 66] Studies encompassed countries with the highest and lowest CS rates globally,  
54  
55  
56  
57

1  
2  
3 and from high, middle and low income settings.[5] See Figure 1:PRISMA Diagram.  
4 Individual studies included between nine and 71 health professionals. Ten studies  
5 were graded A or B for quality. Six were graded C, and one D. Two studies  
6 undertaken alongside RCTs were identified. Both were excluded. One was not  
7 focused on CS.[48] The other did not use qualitative methods.[67] Six included  
8 studies focused on health professional's views in relation to clinical practice  
9 guidelines[47,55,58] and change initiatives.[57,59,62] Eleven explored barriers and  
10 facilitators to CS reduction more generally, and reported data relating to guidelines,  
11 policy initiatives, second opinion strategies, audit, feedback and peer-review.[44-  
12 46,54,56,60-61,63-65] Seven studies had an explicit focus on vaginal birth after  
13 caesarean (VBAC).[54,56,58,62,64-66]

21  
22 Table 1 details the characteristics of included studies and their quality assessment  
23 grade. Table 2 reports the Summary of Findings (SoFs), along with their  
24 CERQual[50-51] ratings. The more detailed Summary of evidence profile table is  
25 available as a supplementary file. Fourteen SoFs statements were derived. They  
26 mapped onto three distinct themes (Table 3): *Philosophy of birth* (4 SoFs); *Social*  
27 *and cultural context* (5 SoFs); and *Negotiation within the system* (5 SoFs). Additional  
28 quotes are provided in Box 1.  
29  
30  
31  
32  
33  
34  
35  
36  
37  
38  
39  
40  
41  
42  
43  
44  
45  
46  
47  
48  
49  
50  
51  
52  
53  
54  
55  
56  
57  
58  
59  
60

**Table 1. Characteristics of included studies and quality assessment**

| Author            | Aim                                                                                                                                                                                                    | Country (Region)                             | Resource | Setting         | Number of participants | Type of participant                            | Method                                      | Quality Assessment |
|-------------------|--------------------------------------------------------------------------------------------------------------------------------------------------------------------------------------------------------|----------------------------------------------|----------|-----------------|------------------------|------------------------------------------------|---------------------------------------------|--------------------|
| Melman (2017)     | To explore barriers and facilitators for delivering optimal care as described in clinical practice guidelines                                                                                          | The Netherlands (European)                   | High     | Rural and urban | 30                     | Obstetricians and Midwives                     | Telephone interviews and focus groups       | B                  |
| Foureur (2017)    | To explore the views and experiences of providers in caring for women considering VBAC                                                                                                                 | Australia (Western Pacific)                  | High     | Urban           | 18                     | Obstetricians and Midwives                     | Semi-structured interviews                  | B                  |
| Lundgren (2016)   | To explore the views of clinicians from countries with low VBAC rates on factors of importance for improving VBAC rates                                                                                | Ireland, Italy and Germany (European)        | High     | Rural and Urban | 71                     | Obstetricians, midwives, neonatologist and GP  | Focus groups                                | A-                 |
| Lundgren (2015)   | To investigate the views of clinicians working in countries with high VBAC rates on factors of importance for improving VBAC rates                                                                     | Finland, Sweden, the Netherlands (European)  | High     | Rural and urban | 44                     | Obstetricians and Midwives                     | Interviews and focus groups                 | A-                 |
| Litorp (2015)     | To explore obstetric caregivers' rationales for their hospital's CS rate to identify factors that might cause CS overuse.                                                                              | Tanzania (African)                           | Low      | Urban           | 32                     | Obstetricians and Midwives                     | Observation, interviews and focus groups    | A                  |
| Marshall (2015)   | To evaluate the 'Focus on Normal Birth and Reducing Caesarean section Rates' programme                                                                                                                 | UK (European)                                | High     | Rural and urban | 16                     | Obstetricians and Midwives                     | Semi-structured interviews                  | B                  |
| Colomar (2014)    | To assess opinions of the determinants of the high rate of caesarean births in Nicaragua as well as possible barriers to and facilitators of optimal caesarean birth rates.                            | Nicaragua (Americas)                         | Middle   | Unclear         | 17                     | Doctors and obstetric decision makers          | Focus Groups                                | A                  |
| Lofti (2014)      | To explore effective strategies to reduce caesarean delivery rates in Iran                                                                                                                             | Iran (Eastern Mediterranean)                 | Middle   | Unclear         | 10                     | Obstetricians and midwives                     | Semi-structured interviews                  | C                  |
| Dunn (2013)       | To reduce high rates of ERCS < 39 weeks across the Eastern Ontario region                                                                                                                              | Canada (Americas)                            | High     | Unclear         | 9                      | Nursing Directors and Managers                 | Key informant interviews                    | C                  |
| Wang (2013)       | To explore reasons for obstetric medical staff choosing caesarean section for themselves in the absence of medical indication                                                                          | China (Western Pacific)                      | Middle   | Urban           | 11                     | Health Professionals                           | Semi-structured Interviews                  | C                  |
| Liu (2010)        | To explore affecting factors of continuing increase in caesarean section rate in rural area                                                                                                            | China (Western Pacific)                      | Middle   | Rural           | 9                      | Health Professionals                           | Focus Groups                                | C                  |
| Cox (2011)        | To explore the barriers associated with the ACOG VBAC guidelines                                                                                                                                       | USA (Americas)                               | High     | Rural and urban | 24                     | Obstetricians, midwives and an administrator   | Semi-structured interviews                  | A-                 |
| Yazdizadeh (2011) | To identify barriers to reduce the caesarean section rate in Iran, as perceived by obstetricians and midwives as the main behavioural change target groups                                             | Iran (Eastern Mediterranean)                 | Middle   | Urban           | 26                     | Hospital directors, obstetricians and midwives | In-depth interviews                         | A-                 |
| Wanyonyi (2010)   | To determine perceptions on the practice of VBAC among maternity service providers in East Africa and possible solutions (including acceptability of evidence, guidelines, and audit)                  | Kenya, Uganda, Tanzania, Ethiopia, (African) | Low      | Unclear         | 63                     | Doctors and midwives                           | Semi-structured questionnaire               | C-                 |
| Chen (2008)       | To explore informed choice and autonomy of uterine-incision delivery making in China                                                                                                                   | China (Western Pacific)                      | Middle   | Urban           | 51                     | Health Professionals                           | In-depth interviews                         | D                  |
| Chaillet (2007)   | To investigate obstetricians perceptions of clinical practice guidelines, and to identify the barriers to, facilitators of, and obstetricians' solutions for implementing these guidelines in practice | Canada (Americas)                            | High     | Urban           | 27                     | Obstetricians                                  | Focus groups and semi-structured interviews | C                  |
| Kamal (2005)      | To explore the views of health professionals on the factors influencing repeat caesarean section                                                                                                       | UK (European)                                | High     | Urban           | 25                     | Doctors and midwives                           | Semi-structured interviews                  | A                  |

Table 2. CERQual Summary of findings (SoFs)

| Review finding                                                                                                                                                                                                                                                                                                                                                                                                                                                                                                                                                                                                                                                                                                                                                                                                                                                                                                                                                                                                                                                                                                                                                                                                                                                                                                | Studies contributing to review finding | CERQual Assessment  | Explanation of confidence in the evidence assessment                                                                                                                                                                                                                     |
|---------------------------------------------------------------------------------------------------------------------------------------------------------------------------------------------------------------------------------------------------------------------------------------------------------------------------------------------------------------------------------------------------------------------------------------------------------------------------------------------------------------------------------------------------------------------------------------------------------------------------------------------------------------------------------------------------------------------------------------------------------------------------------------------------------------------------------------------------------------------------------------------------------------------------------------------------------------------------------------------------------------------------------------------------------------------------------------------------------------------------------------------------------------------------------------------------------------------------------------------------------------------------------------------------------------|----------------------------------------|---------------------|--------------------------------------------------------------------------------------------------------------------------------------------------------------------------------------------------------------------------------------------------------------------------|
| <b>Philosophy of birth</b>                                                                                                                                                                                                                                                                                                                                                                                                                                                                                                                                                                                                                                                                                                                                                                                                                                                                                                                                                                                                                                                                                                                                                                                                                                                                                    |                                        |                     |                                                                                                                                                                                                                                                                          |
| <b>Beliefs about birth:</b> Across HIC and MICs health professionals reported varying beliefs about birth. These included a common approach to birth shared by obstetricians and midwives who valued the physiological process and worked effectively as a team to make it happen (recognising it as an empowering process for women and only intervening when medically necessary), to labour and vaginal birth as a fatally flawed physiological process with CS the preferable means to an end. This dichotomy of beliefs reflected competing ideologies of birth and shaped the importance individuals attached to CS rate reduction. In MIC, while some obstetricians who preferred CS made reference to perinatal mortality and morbidity gains, this was not the experience of the few female, Chinese obstetricians who actually had CDMR, nor the preference of Iranian obstetricians who expressed concerns about having to deal with co-morbidities caused by previous CSs. Beliefs were influenced by professional training, personal experience, and practice setting.                                                                                                                                                                                                                           | 44-46,54,57-62,64-66                   | Moderate confidence | 13 studies with minor to significant methodological limitations. Rich data from 14 countries across 4 geographical regions, high- and middle- income levels, and high and low CS rates. Reasonable level of coherence with uncertain confidence in low-income countries. |
| <b>Beliefs about what constitutes necessary and unnecessary CS:</b> Some health professionals reported CS rates as determined by factors beyond their control (i.e. uncertain obstetric history, unfolding obstetric circumstance and clinical indications), but between health professionals there was no clear consensus as to what they believed to be clinical indications across time (i.e. breech), place (i.e. availability and access) and parity (i.e. women with a previous CS). Some senior doctors and midwives expressed concerns that less experienced staff are more likely to perform CS based on vague indications and spoke favourably about wanting junior staff to consult them more for a second opinion. Other senior staff suggested second opinion policies only work where both doctors are in attendance at the hospital. While some residents also reported wanting improved communication, they feared seeking a second opinion would negatively impact their clinical credibility and career.                                                                                                                                                                                                                                                                                    | 47,54-57,63                            | Low confidence      | 6 studies with minor to moderate methodological limitations. Thin data, with major concerns about coherence across settings.                                                                                                                                             |
| <b>Beliefs about the evidence-base surrounding caesarean section:</b> Health professionals' views about research evidence varied. Most health professionals recognised that guidelines represent the national or international evidence-base, which sensitised them to reflect on their practice, providing a potential mechanism for change. Most health professionals wanted more evidence of transferability to their own practice context, particularly in MIC and LIC contexts, where audit was not common. Not all health professionals believed available evidence to be valid, applicable to their practice, or feasible to implement, and spoke about keeping-up-to-date with the latest evidence as challenging. Across resource settings obstetricians and midwives expressed concerns about evidence of risks associated with CS as incomplete. Some health professionals who valued guidelines were also very clear they took other factors into account in actual decision-making (i.e. interpersonal relationships, patient's unique characteristics).                                                                                                                                                                                                                                         | 54-55, 57-59,61-64                     | Moderate confidence | 10 studies with minor to moderate methodological limitations. Rich data from across 3 geographical regions but limited data from LICs. High coherence across HICs and MICs. Uncertain confidence in LICs.                                                                |
| <b>Belief in need to reduce unnecessary CS and receptiveness to change:</b> Across resource settings health professionals reported concerns about high CS rates and associated morbidity. In Iran and Tanzania some health professionals spoke about colleagues who performed CS for non-medical reasons as contravening medicines underlying ethical principle to do no harm. In European settings, health professionals experienced interventions targeted to reduce unnecessary CS as most acceptable where this vision was shared within and between multi-disciplinary groups. In the UK and Scandinavia, health professionals from organisations that achieved success in reducing rates had positive attitudes towards critical self-reflection (including audit, second opinion and continuing medical education) and felt supported by colleagues and opinion leaders. Across resource settings health professionals acknowledged concerted action to reduce unnecessary CS as challenging, but achievable and intrinsically rewarding where there was respect, accountability, and shared responsibility to support women achieve a vaginal birth.                                                                                                                                                  | 54-55, 57-59,61-64                     | Moderate confidence | 9 studies with no to moderate methodological limitations. Thick data from Europe. Only one study from African region contributed to this finding. High coherence.                                                                                                        |
| <b>Social and cultural context</b>                                                                                                                                                                                                                                                                                                                                                                                                                                                                                                                                                                                                                                                                                                                                                                                                                                                                                                                                                                                                                                                                                                                                                                                                                                                                            |                                        |                     |                                                                                                                                                                                                                                                                          |
| <b>Fear of blame and recrimination (including medico-legal concerns):</b> Across HIC, MIC and LICs health professionals reported fear of litigation as an important influence on their low threshold for performing CS (although no-one had actual experience of litigation in LIC). Predominantly in North America health professionals described medico-legal concerns as an underlying factor in non-compliance to guideline recommendations. Across urban and rural settings with or without 24-hour obstetrical and anaesthesia coverage, obstetricians and midwives weighed up the balance of professional identity risk with not intervening, a poor outcome ensuing and a medico-legal case against them. Also in North America some obstetricians were opposed to second-opinion policies because of the difficulties in medico-legal responsibilities that could ensue. In North America, some European countries and Africa, midwives and obstetricians expressed concerns about threats to their professional identity and career prospects posed by internal audit and feedback. A few health professionals welcomed guidelines as providing a defensible basis for their practice, while other midwives and obstetricians were undeterred in their commitment to intervene only when necessary. | 45,54-55,57-58,61,63-64                | Moderate confidence | 8 studies, with no to moderate methodological limitations. Rich data from 5 countries. Moderate coherence.                                                                                                                                                               |
| <b>Value attached to financial rewards associated with CS:</b> Some health professionals were outspoken about the economic incentives for CSs, particularly in private healthcare facilities. This included doctors in Tanzania, Iran, China and Nicaragua, as well as midwives in Iran and the USA. Some doctors considered CS to involve more work, which justified the payment; others blamed the system, while others still reported personally valuing this extra income.                                                                                                                                                                                                                                                                                                                                                                                                                                                                                                                                                                                                                                                                                                                                                                                                                                | 45,47,55,57-58,60-61,63                | Moderate confidence | 8 studies with minor to moderate methodological limitations. Rich data predominantly from middle-income countries.                                                                                                                                                       |



|                                                                                                                                                                                                                                                                                                                                                                                                                                                                                                                                                                                                                                                                                                                                                                                                                                                                                                                                                                  |                            |                     |                                                                                                                                                                                                                 |
|------------------------------------------------------------------------------------------------------------------------------------------------------------------------------------------------------------------------------------------------------------------------------------------------------------------------------------------------------------------------------------------------------------------------------------------------------------------------------------------------------------------------------------------------------------------------------------------------------------------------------------------------------------------------------------------------------------------------------------------------------------------------------------------------------------------------------------------------------------------------------------------------------------------------------------------------------------------|----------------------------|---------------------|-----------------------------------------------------------------------------------------------------------------------------------------------------------------------------------------------------------------|
| Some doctors, and midwives, were critical of insufficient monetary reward to staff labour and vaginal birth by comparison.                                                                                                                                                                                                                                                                                                                                                                                                                                                                                                                                                                                                                                                                                                                                                                                                                                       |                            |                     | High coherence.                                                                                                                                                                                                 |
| <b>Preferences for CS as convenient:</b> Health professionals valued both the scheduling CS offers and the lesser time commitment it entails compared with labour and vaginal birth. Some health professionals described how CS was convenience for women too (for the same reasons), although others recognised while CS might be more convenient for them, it is not what every woman wants.                                                                                                                                                                                                                                                                                                                                                                                                                                                                                                                                                                   | 46,57-61,63                | Moderate confidence | 7 studies with minor to moderate methodological limitations. Fairly rich data from 2 studies and convenience a theme in a third. High coherence.                                                                |
| <b>Beliefs about women:</b> Across the world, health professionals reported women's demand for a particular birth method as an important factor influencing rates of CS, NVD and VBAC. Some health professionals believed women now value CS as a consumer choice (available in public and private healthcare settings), others attributed increasing rates to women's lower threshold for CS during labour. In HIC, MICs and one LIC (Tanzania), a few health professionals spoke about women's innate ability to labour and birth as being diminished by rising BMIs, advanced maternal age, sedentary lifestyles and "western diseases". Health professionals also perceived women as lacking in antenatal education, being influenced by their families, and the plethora of information about birth available in the media and on-line.                                                                                                                     | 45-47,54-61,63-66          | High confidence     | 15 studies with no to moderate methodological limitations. Thick data from 15 countries, across 5 world regions, high-, middle- and low-income settings with high CSRs. High coherence.                         |
| <b>Dysfunctional teamwork, within the medical profession and including the marginalization of midwives:</b> Health professionals reported dysfunctional teamwork within and between professionals as an important barrier to reducing unnecessary CS rates. Medicine's entrenched hierarchies, lack of communication between maternity and theatre staff, and difficult relationships between obstetricians, midwives and family doctors were all spoken about. Some midwives and obstetricians spoke passionately about the marginalization of midwives and their exclusion from birth as counterproductive.                                                                                                                                                                                                                                                                                                                                                    | 47,55-63,65                | Moderate confidence | 11 studies with minor to moderate methodological limitations. Thick data from across resource settings. High coherence.                                                                                         |
| <b>Negotiation within the system</b>                                                                                                                                                                                                                                                                                                                                                                                                                                                                                                                                                                                                                                                                                                                                                                                                                                                                                                                             |                            |                     |                                                                                                                                                                                                                 |
| <b>Organisation of care:</b> Across the world, health professionals perceived the maternity care system as insufficiently resourced (human and material). Midwives and Obstetricians reported where CS was an important source of revenue operating facilities were a priority, and facilities for labouring women were poor and inadequately staffed.                                                                                                                                                                                                                                                                                                                                                                                                                                                                                                                                                                                                           | 47,55-59,61-63,65          | Moderate confidence | 10 studies with no to moderate methodological limitations. Thin data from 13 countries, and thick data from Iran. High coherence.                                                                               |
| <b>Beliefs about need for high-level infrastructures:</b> Health professionals in HICs who were supportive of VBAC were flexible in their interpretation of guidelines and used them and available technologies in a facilitative way. Other health professionals, predominantly from MICs and LICs, but some from HICs, expressed concerns that a lack of human and technological resource made guideline recommendations unworkable in practice. In HICs where 24-hour obstetrical and anaesthesia cover was available, some health professionals reported women were still refused a trial of labour.                                                                                                                                                                                                                                                                                                                                                         | 47,54-66                   | Moderate confidence | 14 studies with no to moderate methodological limitations. Thick data from HICs and MICs. The finding may have higher confidence in settings where the level of resource is sufficient to sustain necessary CS. |
| <b>Reluctance to change based on lack of training, skills or experience:</b> Some health professionals spoke about how pre-and post-registration training has ill-equipped the next generation for a reduction in CS rates as they have little experience, competency or confidence in normal labour and vaginal birth. Others reported wanting specific training on recommendations to make them more acceptable in practice. Reasons for many health professionals lack of buy-in was multifactorial - see also Organisation of care; Beliefs about need for complex infrastructure; and Beliefs about the clinical encounter and autonomous decision-making                                                                                                                                                                                                                                                                                                   | 45,47,55-57,59,61,65-66    | Low confidence      | 9 studies with minor to significant methodological limitations. Thick data from one study. Extent of coherence unclear.                                                                                         |
| <b>Views about the format, content and delivery of interventions:</b> A few health professionals spoke about the importance of the tone of guidance as facilitative of reflection, not dictatorial, judgmental or threatening, at the same time as being clear about the need for change by avoiding the use of words such as 'should', 'developmental' or 'pilot.' Some health professionals described how important it was for local opinion leaders to endorse projects, and where external facilitators were involved they are 'credible' and 'grounded', exercised cultural humility, and understand the challenges within specific practice settings. In some HICs, health professionals talked about multi-disciplinary /inter-professional team involvement meaning representatives from medicine (obstetrics, anaesthesia, paediatrics), nursing and midwifery, allied health professionals, quality, health records, and scheduling in secondary care. | 55,57,59,61-63             | Low confidence      | 6 studies with minor to significant methodological limitations. Thick data from one study. Extent of coherence unclear.                                                                                         |
| <b>Beliefs about the clinical encounter and autonomous decision-making:</b> Obstetricians and midwives' views varied as to who they thought should have the final say in the decision to perform a CS. Some health professionals accepted a woman's right to choose CS, many thought the decision should be shared, while others believed the decision could only be made by health professionals qualified to do so. Some health professionals expressed concern time constraints in practice limited their opportunities to facilitate informed decision-making. Where teams had a shared approach, they reported informed decision-making did happen and irrespective of who made the final decision everyone involved was reassured by the process.                                                                                                                                                                                                          | 44-47,54-55,57-59,61-64,66 | Moderate confidence | 14 studies with no to significant methodological limitations. Thick data from HICs, MICs and one LIC. High coherence.                                                                                           |

**Table 3. Summary of initial concepts, emergent themes and final themes**

| Initial concepts                                                                 | Emergent themes/SoFs                                                                                       | Studies contributing to review finding | Final themes                                                                                                                                                                                                                                                                                                                                                                                          |
|----------------------------------------------------------------------------------|------------------------------------------------------------------------------------------------------------|----------------------------------------|-------------------------------------------------------------------------------------------------------------------------------------------------------------------------------------------------------------------------------------------------------------------------------------------------------------------------------------------------------------------------------------------------------|
| Belief in a common approach to birth across obstetrics and midwifery             | <b>Beliefs about birth</b>                                                                                 | 44-46,54,57-62,64-66                   | <b>Underpinning philosophy of beliefs about birth</b> informs both the importance health professionals attach to reducing unnecessary CS and the effectiveness of healthcare teams to do so with competing knowledge claims about what are clinically necessary and unnecessary CS across time, place and discipline used by health professionals to either endorse or dispute the value of CS per se |
| Belief in value of physiological labour and vaginal birth                        |                                                                                                            |                                        |                                                                                                                                                                                                                                                                                                                                                                                                       |
| Belief in CS as progressive for birth                                            |                                                                                                            |                                        |                                                                                                                                                                                                                                                                                                                                                                                                       |
| Doubts about the value of CS and concerns about co-morbidities                   |                                                                                                            |                                        |                                                                                                                                                                                                                                                                                                                                                                                                       |
| Belief CS rate determined by factors beyond health professionals control         | <b>Beliefs about what constitutes necessary and unnecessary CS</b>                                         | 47,54-57,63                            |                                                                                                                                                                                                                                                                                                                                                                                                       |
| Ambiguity surrounding medical indications for CS                                 |                                                                                                            |                                        |                                                                                                                                                                                                                                                                                                                                                                                                       |
| Views and experiences of seeking a second opinion                                |                                                                                                            |                                        |                                                                                                                                                                                                                                                                                                                                                                                                       |
| Evidence as mechanism for change                                                 | <b>Beliefs about the evidence-base surrounding caesarean section</b>                                       | 54-55, 57-59,61-64                     |                                                                                                                                                                                                                                                                                                                                                                                                       |
| Evidence as incomplete, unconvincing or not applicable                           |                                                                                                            |                                        |                                                                                                                                                                                                                                                                                                                                                                                                       |
| Views about guideline adherence and local audit                                  |                                                                                                            |                                        |                                                                                                                                                                                                                                                                                                                                                                                                       |
| Belief CS rates are too high                                                     | <b>Belief in need to reduce unnecessary CS and receptiveness to change</b>                                 | 54-55, 57-59,61-64                     |                                                                                                                                                                                                                                                                                                                                                                                                       |
| Belief unnecessary CS is unethical, negligent practice                           |                                                                                                            |                                        |                                                                                                                                                                                                                                                                                                                                                                                                       |
| Positive attitudes towards guidelines, 2nd opinion, audit and feedback           | <b>Fear of blame and recrimination (including medico-legal concerns)</b>                                   | 45,54-55,57-58,61,63-64                | <b>Social and cultural context</b> exerts an important influence on health professional's commitment to reducing CS rates. This includes fear of blame and medico-legal concerns, financial incentives and health professionals perceptions of women                                                                                                                                                  |
| Fear of blame in event of poor outcome of NVD                                    |                                                                                                            |                                        |                                                                                                                                                                                                                                                                                                                                                                                                       |
| Fear of threat to professional identify and career progression                   |                                                                                                            |                                        |                                                                                                                                                                                                                                                                                                                                                                                                       |
| Fear of litigation                                                               |                                                                                                            |                                        |                                                                                                                                                                                                                                                                                                                                                                                                       |
| Value greater monetary reward associated with CS                                 | <b>Value attached to financial rewards associated with CS</b>                                              | 45,47,55,57-58,60-61,63                |                                                                                                                                                                                                                                                                                                                                                                                                       |
| Value scheduling CS and less time commitment compared NVD                        | <b>Preferences for CS as convenient</b>                                                                    | 46,57-61,63                            |                                                                                                                                                                                                                                                                                                                                                                                                       |
| Perception women are changing                                                    | <b>Beliefs about women</b>                                                                                 | 45-47,54-61,63-66                      |                                                                                                                                                                                                                                                                                                                                                                                                       |
| Perceptions of what woman want                                                   |                                                                                                            |                                        |                                                                                                                                                                                                                                                                                                                                                                                                       |
| Belief women lack confidence in NVD                                              |                                                                                                            |                                        |                                                                                                                                                                                                                                                                                                                                                                                                       |
| No team work within profession/not easy to listen to opinion of peers            |                                                                                                            |                                        |                                                                                                                                                                                                                                                                                                                                                                                                       |
| Little or no cross-professional working                                          | <b>Dysfunctional teamwork, within the medical profession and including the marginalization of midwives</b> | 47,55-63,65                            |                                                                                                                                                                                                                                                                                                                                                                                                       |
| Marginalization of MWs                                                           |                                                                                                            |                                        |                                                                                                                                                                                                                                                                                                                                                                                                       |
| Concerns about the organisation of care                                          |                                                                                                            |                                        |                                                                                                                                                                                                                                                                                                                                                                                                       |
| Insufficient human resource                                                      | <b>Organisation of care</b>                                                                                | 47,55-59,61-63,65                      | <b>Health professionals may negotiate health system factors</b> in accordance with their underpinning philosophy about birth, women and medicine, where the level of resource is sufficient to sustain necessary CS should a clinical need arise                                                                                                                                                      |
| Need 24-hour anaesthetic cover                                                   |                                                                                                            |                                        |                                                                                                                                                                                                                                                                                                                                                                                                       |
| Need 24-hour consultant cover                                                    |                                                                                                            |                                        |                                                                                                                                                                                                                                                                                                                                                                                                       |
| Need for more equipment                                                          |                                                                                                            |                                        |                                                                                                                                                                                                                                                                                                                                                                                                       |
| Challenges to need for technology                                                | <b>Beliefs about need for high-level infrastructures</b>                                                   |                                        |                                                                                                                                                                                                                                                                                                                                                                                                       |
| Belief strategy /intervention would not be effective                             |                                                                                                            |                                        |                                                                                                                                                                                                                                                                                                                                                                                                       |
| Pre- and post-registration education does not prioritise NVD skills and training |                                                                                                            |                                        |                                                                                                                                                                                                                                                                                                                                                                                                       |
| Perception insufficient time to implement                                        |                                                                                                            |                                        |                                                                                                                                                                                                                                                                                                                                                                                                       |
| Perception insufficient resources                                                | <b>Reluctance to change based on lack of training, skills or experience</b>                                | 45,47,55-57,59,61,65-66                |                                                                                                                                                                                                                                                                                                                                                                                                       |
| Positive tone of intervention (reflective, facilitative)                         |                                                                                                            |                                        |                                                                                                                                                                                                                                                                                                                                                                                                       |
| Without fear of blame or threat to professional identify                         |                                                                                                            |                                        |                                                                                                                                                                                                                                                                                                                                                                                                       |
| Use of language (i.e. not conditional verb tense – should)                       |                                                                                                            |                                        |                                                                                                                                                                                                                                                                                                                                                                                                       |
| Women's right to choose CS                                                       | <b>Views about the format, content and delivery of interventions</b>                                       | 55,57,59,61-63                         |                                                                                                                                                                                                                                                                                                                                                                                                       |
| Informed decision making too lengthy                                             |                                                                                                            |                                        |                                                                                                                                                                                                                                                                                                                                                                                                       |
| Doctor's decision takes precedence                                               |                                                                                                            |                                        |                                                                                                                                                                                                                                                                                                                                                                                                       |
| Decision-making process with women                                               |                                                                                                            |                                        |                                                                                                                                                                                                                                                                                                                                                                                                       |
| Decision-making process with women                                               | <b>Beliefs about the clinical encounter and autonomous decision-making</b>                                 | 44-47,54-55,57-59,61-64,66             |                                                                                                                                                                                                                                                                                                                                                                                                       |
|                                                                                  |                                                                                                            |                                        |                                                                                                                                                                                                                                                                                                                                                                                                       |
|                                                                                  |                                                                                                            |                                        |                                                                                                                                                                                                                                                                                                                                                                                                       |
|                                                                                  |                                                                                                            |                                        |                                                                                                                                                                                                                                                                                                                                                                                                       |

## Box 1: Themes with supporting quotes

| Philosophy of birth                                                                                                                                                                                                                                                                                                                                                                                                                                                                                                                                                                                                                                                                                                                                                                                                                                                                                                                                                                                                                                                                                                                                                                                                                                                                                                                                                                                                                                                                                                                                                                                                                                                                                                                                                                                                                                                                                                                                                                                                                                                                                                                                                                                                                                                                                                                                                                                                                                                                                                                                                                                                                                                                                                                                                                                                                                                                                                                                                                                                                                                                                                                                                                                                                                                                                                                                                                                                                     |
|-----------------------------------------------------------------------------------------------------------------------------------------------------------------------------------------------------------------------------------------------------------------------------------------------------------------------------------------------------------------------------------------------------------------------------------------------------------------------------------------------------------------------------------------------------------------------------------------------------------------------------------------------------------------------------------------------------------------------------------------------------------------------------------------------------------------------------------------------------------------------------------------------------------------------------------------------------------------------------------------------------------------------------------------------------------------------------------------------------------------------------------------------------------------------------------------------------------------------------------------------------------------------------------------------------------------------------------------------------------------------------------------------------------------------------------------------------------------------------------------------------------------------------------------------------------------------------------------------------------------------------------------------------------------------------------------------------------------------------------------------------------------------------------------------------------------------------------------------------------------------------------------------------------------------------------------------------------------------------------------------------------------------------------------------------------------------------------------------------------------------------------------------------------------------------------------------------------------------------------------------------------------------------------------------------------------------------------------------------------------------------------------------------------------------------------------------------------------------------------------------------------------------------------------------------------------------------------------------------------------------------------------------------------------------------------------------------------------------------------------------------------------------------------------------------------------------------------------------------------------------------------------------------------------------------------------------------------------------------------------------------------------------------------------------------------------------------------------------------------------------------------------------------------------------------------------------------------------------------------------------------------------------------------------------------------------------------------------------------------------------------------------------------------------------------------------|
| <p>"If somebody says that a woman needs a caesarean our senior midwives are prepared to say 'why?' ... we're all working for the same thing' (Obstetrician, UK Marshall, 2016:337)</p> <p>"It's just kind of a personal philosophy, too. Otherwise you'd be too afraid to do anything." (CNM, USA, Cox 2011:5)</p> <p>"We have a 60 or 65% CSR, but we must not only focus on the percentage of caesareans, but also on the percentage of children admitted to the NICU; the perinatal mortality rate here is low (0–3 %)" (Nicaragua, Colomar 2014:2385)</p> <p>"With increase of caesarean section rate mortality of newborn and maternal mortality ratio remained low." (China, Liu 2010)</p> <p>"As a doctor I don't believe caesarean section is the best choice. Caesarean should be used as necessary." (China, Chen 2008)</p>                                                                                                                                                                                                                                                                                                                                                                                                                                                                                                                                                                                                                                                                                                                                                                                                                                                                                                                                                                                                                                                                                                                                                                                                                                                                                                                                                                                                                                                                                                                                                                                                                                                                                                                                                                                                                                                                                                                                                                                                                                                                                                                                                                                                                                                                                                                                                                                                                                                                                                                                                                                                   |
| <p>"... we used to deliver breeches [vaginally] and we no longer deliver breeches" (Doctor, UK, Kamal 2005:1056).</p> <p>"The mode of delivery in case of a breech presentation depends on the expertise of the obstetrician in attendance" (Midwife, The Netherlands, Melman 2017:5)</p> <p>"Maybe they [residents] say that it was 'fetal distress' but it was not fetal distress, it was 'doctor's distress' ... [laughter]" (Specialist, Tanzania, Litop 2015:235)</p> <p>"Residents who perform the job, decide in favor of CS as soon as even a small problem is encountered..." (Specialist, Iran, Yazdizadeh 2011:7)</p> <p>"Quality of care can put pressure on people to do what the clients want rather than what is clinical need" (Midwife, UK, Kamal 2005:1057)</p> <p>"The discrepancy between the midwives' and the specialists' information is our main problem. We don't believe in issues that the physicians accept as true" (Midwife, Iran, Yazdizadeh 2011:9)</p> <p>"Continuous CTG according to protocol is recommended. However, the difficulty with that is the risk for uterine rupture is 1:1000 and so very low...I am a little flexible in this." (Obstetrician, Netherlands, Lundgren 2015:6)</p> <p>"If the woman is nulliparous, pregnant with a child that is expected to be large for gestational age and with a fetal head not engaged at term, it depends on her characteristics whether or not I will discuss a CS" (Midwife, Melman 2017:3)</p> <p>"I went on and looked at CS rates throughout the country. And was quite disappointed to see how high some of them were really" (Midwife, UK, Kamal 2005:1055).</p> <p>"We started looking at some of the CS, why are we doing them, discussing them in meetings, and these CS weren't necessarily indicated." (Obstetrician); "I do think we've made good progress with it, but I think it would be complacent if we sat here to say ... there isn't more work to do, because there's always more work to do ... to keep developing and improving the service. You know, it's good today but tomorrow can be better..." (Head of Midwifery, UK, Marshall 2016:335)</p> <p>"Despite the reduced number of pregnancies, women undergo surgeries due to various other reasons in which the adhesions caused by previous C-sections might become troublesome." (Iran, Yazdizadeh 2011:6)</p>                                                                                                                                                                                                                                                                                                                                                                                                                                                                                                                                                                                                                                                                                                                                                                                                                                                                                                                                                                                                                                                      |
| Social and cultural context                                                                                                                                                                                                                                                                                                                                                                                                                                                                                                                                                                                                                                                                                                                                                                                                                                                                                                                                                                                                                                                                                                                                                                                                                                                                                                                                                                                                                                                                                                                                                                                                                                                                                                                                                                                                                                                                                                                                                                                                                                                                                                                                                                                                                                                                                                                                                                                                                                                                                                                                                                                                                                                                                                                                                                                                                                                                                                                                                                                                                                                                                                                                                                                                                                                                                                                                                                                                             |
| <p>"Obstetricians are in a constant fear of being sued, so they're taking a path of least resistance" (Doctor, USA, Cox 2011:5)</p> <p>"Your reputation is important. No one will give you a gold medal for a VBAC rate of 95 % if you make one mistake" (Ireland, Lundgren 2016:6)</p> <p>"I am coming towards retirement, I don't want to go to court" (Midwife, UK Kamal 2005:1058)</p> <p>"Our society has spent more time on teaching the process of suing rather than introducing the labor to the general public" (Midwife, Iran, Yazdizadeh 2011:5).</p> <p>"In the private sector, providers are reimbursed approximately \$700 for normal childbirth and \$1,500 for CS, so the doctor prefers to perform a CS" (Nicaragua, Colomar 2014:2388)</p> <p>"...Profit from CS surgery is much high than vaginal delivery" (Healthcare provider, China, Liu, 2010)</p> <p>"The main problem with natural delivery is its unpredictability, as it may occur anytime and disturb the physician's program" (Specialist, Iran, Yazdizadeh 2011:4)</p> <p>"People don't want to wait too long. Rather than waiting the whole night, they take a short-cut." (Consultant, Tanzania, Litop 2015:235).</p> <p>"We know that CS is not indicated in low-risk pregnancy, but to avoid the night pressure and the work during the night..." (Colomar 2014:2385)</p> <p>"Some of them (women), they just quite like a planned thing. They have the caesarean." (Midwife, Australia, Fourer 2017:6)</p> <p>"It is requested a lot (CS)" (Ob/Gyn physician, Nicaragua, Colomar 2014:2385)</p> <p>"In the end of the day, when they come to deliver, they are so weak, they cannot push the babies. So the patients themselves are the ones requesting for CS, because they cannot tolerate the labor pain" (Resident, Tanzania, Litop 2015:235).</p> <p>"...not following a healthy diet have reduced the capabilities of our girls in this regard [to undergo vaginal delivery]" (Physician, Iran, Yazdizadeh 2011:10)</p> <p>"Inadequate information to mothers makes them fear labouring!.." (Kenya, Wanyonyi 2010:338)</p> <p>Sometimes it is the mother's mother and her sister and all that out there [general agreement]. I am afraid, I am reading this. And it is the Internet, its Dr Google" (Ireland, Lundgren 2016:6)</p> <p>"You can never ignore the information a patient receives from a neighbour or a niece. That sometimes seems more important than the medical information you provide" (Netherlands, Melman 2017:5)</p> <p>"You might enter into a situation of decision of unnecessary CS because of the, you know, friction with the midwives" (Resident, Tanzania, Litop 2015:236)</p> <p>"In our hospital, the residents are not allowed to independently consult the anaesthesiologist at night" (Resident, The Netherlands, Melman 2017:5)</p> <p>"The GP is vital... If the GP will support you, then you are in business" (Obstetrician, Ireland, Lundgren 2016:4)</p> <p>"There is a little more work to be done in primary care, with nursing assistants, with social workers... to create a little awareness of what a vaginal delivery is" (Nicaragua, Colomar 2014:2388)</p> <p>"There is no joint meeting between the midwifery and obstetricians associations." (Midwife, Iran, Yazdizadeh 2011:9)</p> <p>"Then the ACOG shift happened... So we had to stop doing them [VBACs]" (CNM, USA, Cox 2011:7)</p> |
| Negotiation within the system                                                                                                                                                                                                                                                                                                                                                                                                                                                                                                                                                                                                                                                                                                                                                                                                                                                                                                                                                                                                                                                                                                                                                                                                                                                                                                                                                                                                                                                                                                                                                                                                                                                                                                                                                                                                                                                                                                                                                                                                                                                                                                                                                                                                                                                                                                                                                                                                                                                                                                                                                                                                                                                                                                                                                                                                                                                                                                                                                                                                                                                                                                                                                                                                                                                                                                                                                                                                           |
| <p>"In our hospital improved support during labour could reduce CS rates. However, we know upfront that an increase in staffing is not an option" (The Netherlands, Melman 2017:6)</p> <p>"Nobody can tell what will happen during a trial of labour (TOL), so we should say that a TOL is possible, but only if we have staff who are not overworked and exhausted." (Italy, Lundgren 2016:5)</p> <p>"It is not possible to promote physiologic delivery without spending on it" (Midwife, Iran, Yazdizadeh, 2011:9)</p> <p>"We cannot monitor the foetus continuously...why try a scar" (East Africa, Wanyonyi, 2010:338)</p> <p>"If the patient is given enough time, she may have a normal delivery, but as the risk of a uterus rupture is present during labor and we need a blood bank available, we perform an elective surgery" (Ob/Gyn physician, Colomar 2014:2385)</p> <p>"Not everybody needs to be on CTGs and that they don't need to be on beds and stuff like that..." (Midwife, UK, Marshall 2016:337)</p>                                                                                                                                                                                                                                                                                                                                                                                                                                                                                                                                                                                                                                                                                                                                                                                                                                                                                                                                                                                                                                                                                                                                                                                                                                                                                                                                                                                                                                                                                                                                                                                                                                                                                                                                                                                                                                                                                                                                                                                                                                                                                                                                                                                                                                                                                                                                                                                                            |

1  
2  
3  
4  
5  
6  
7  
8  
9  
10  
11  
12  
13  
14  
15  
16  
17  
18  
19  
20  
21  
22  
23  
24  
25  
26  
27  
28  
29  
30  
31  
32  
33  
34  
35  
36  
37  
38  
39  
40  
41  
42  
43  
44  
45  
46  
47  
48  
49  
50  
51  
52  
53  
54  
55  
56  
57  
58  
59  
60

"In the past few years many obstetricians have never had the opportunity to do a vaginal delivery"; "If you ask any of the midwives in our hospital, they attest that they have not conducted a natural delivery for years" (Specialists and Hospital Director, Iran, Yazdiadeh 2011:4)

"Nowadays we can see how the culture has affected the training of residents [junior obstetricians]. For residents, a previous CS means another CS. They have to be told that a woman can have a VBAC" (Italy, Lundgren 201:5)

"I think we should realize that we are the ones who have done them that way" [trained residents in hierarchical structures where admonishment has made them reluctant to seek a second opinion] (Specialist, Tanzania, Litorp 2015:235).

"The Toolkit was not dictatorial in nature but rather it enabled the team to decide "where as an organisation you wanted to be" (Midwife); "...everybody had a greater awareness; consultants, registrars, SHOs, ultrasonographers, student midwives, student nurses, anaesthetists even came [to the meetings]. ... they all bring a different perspective, and they also take credibility back to their own peer group." (Midwifery Manager, UK, Marshall 2016:337)

Non-responsible personnel such as the head of the network and health officials in small provinces force young specialists to stay away from C-section" (Specialist, Iran, Yazdizadeh 2011:4)

"...A trial of labour should be offered to a woman with one previous transverse low-segment caesarean section. The use of conditional verb tense in the guideline has been identified as a potential barrier to adopting the recommendations, refusing any sort of obligation." (Chaillet 2007:794)

"Developmental" or "pilot" project, and inviting rather than mandating participation (Dunn 2013:311)

"I'll do it [CS]! Because she has already decided! Or she will go to someone else" (Specialist, Tanzania, Litorp, 2015:235)

"That's about the same thing as if I decide how the plumber should place the pipes in my home, or if I should go on a long holiday abroad and beforehand go to the surgeon and say, can I have my appendix removed so I don't get sick?" (Midwife, Sweden, Lundgren, 2015:6)

"I am very good at telling people what they don't want, what they can't have. What they mustn't expect. I'm damned if I let somebody come and say, 'I'm going to have something this way' unless they are prepared to pay for it" (Midwife, UK, Kamal 2005:1058)

"We need time to be able to approach the patients [to talk about Labour and vaginal birth], and what we have in this hospital is lack of time; we are so overloaded that we usually give only 15 min per patient" (Physician, Nicaragua, Colomar 2014:2388)

"Time is a factor. But we have a "Towards Normal Birth" midwife who is [very available] to us" (Midwife, Australia, Fourer 2017:6)

## Theme 1: Philosophy of birth

This theme encapsulates how the philosophy of birth expressed by both individuals and teams acts as a guiding principle underpinning the value health professionals' attach to CS reduction, and, therefore, to interventions designed for this purpose. Underpinning beliefs about birth play out in everyday clinical practice, including which caesareans, if any, health professionals view as unnecessary; how available evidence is used; and receptiveness, or not to change.

**Beliefs about birth.** Across 13 studies[44-46,54,57-62,64-66] from 14 countries, varying beliefs about birth were reported. An inter-disciplinary, cross-system shared belief in vaginal birth was a key mechanism to facilitating a common approach that could help women deliver vaginally, as typified by a midwife from the Netherlands: "*it is very clear that the hospitals we work with are also very much advocates of VBAC in the same way we are.*"[64:p.4] In contrast, a specialist from Iran, where the CS rate was in excess of 40%, said "*The general belief indicates that caesarean is better than vaginal delivery. The dominant paradigm says so.*"[57:p.4] Some health professionals in the review valued labour and vaginal birth as a physiological process. Others believed that labour and birth in general, or VBAC in particular, comes "*with the big-risk of a very-bad outcome.*"[65:p.4] These individuals thought CS was a reasonable solution for many if not most women, even if they had some doubts about the safety of the operation.

**Beliefs about what constitutes necessary and unnecessary CS and beliefs about the evidence.** There was ambiguity surrounding what health professionals believe constitutes a definite clinical indication for CS. This varied across time (e.g. changing views about the need for CS for breech presentation); place (the extent to which CS was available and accessible locally); or clinical history (i.e. whether women with a previous CS should or should not have a repeat operation in a subsequent pregnancy).[47,54-57,63] Health professionals chose the evidence they used to support their position.[54-55,57-59,61-64] Evidence could provide an impetus for change, but not where it was viewed as incomplete, unconvincing or inapplicable.[59,61] In Nicaragua, for instance, specific concerns were expressed about the relevance of available evidence because "*Studies have shown that VBAC*

1  
2  
3 *is a good option, but these studies have been done in developed countries where*  
4 *educated people space their pregnancies*’[61:p2385] The absence of very local  
5 evidence was used as a rationale for resisting change: “*The truth is that we don’t*  
6 *have statistics of CS complications that might negatively influence the decision to*  
7 *perform a CS, like fatal-deadly outcomes or anything like that.*”[61:p.2388]  
9

### 12 **Belief in the need to reduce unnecessary CS, and receptiveness to change.**

13  
14 Across resource settings, some health professionals’[54-55,57-59,61-64]  
15 acknowledged that some CSs “*weren’t necessarily indicated*”[62:p.334] and CS rates  
16 were in general too high.[54] Participants from Iran and Tanzania raised specific  
17 concerns about “*whether CS on demand in private patients should be considered*  
18 *malpractice*”[63:p.235] and that “*physicians should respect ethical rules*”[57:p.6],  
19 rather than acceding to patient demand. Positive attitudes towards continuing  
20 professional education and development were important to reintroducing belief in  
21 vaginal birth. “*We are strengthened by watching how happy the patients are when it*  
22 *works, and we have the experience of how excellently women give birth, so we are*  
23 *strengthened by this [experience] in our care of all the other [women].*”[64:p.7] Health  
24 professionals from organisations that achieved success in reducing rates of CS  
25 worked in cultures that valued clinical audit, second opinion and/or continuing  
26 medical education as part of continuous quality improvement.[59,62] As this Head of  
27 Midwifery in UK said “*we knew we had a problem, we knew what the issues were,*  
28 *actually addressing them was the challenge for us.*” [62:p.337]  
29  
30  
31  
32  
33  
34  
35  
36  
37  
38  
39  
40  
41

### 42 **Theme 2: Social and cultural context (5 SoFs)**

43  
44 The second theme explores how social and cultural context exerts an important  
45 influence on health professional’s commitment to reducing CS, or not. Resistance  
46 was influenced by fear of blame and recrimination, including fear of litigation for not  
47 intervening; the value attached to personal financial rewards associated with CS;  
48 and preference for CS as a convenient, efficient birth method that can be scheduled.  
49 This was contextualised by shifting beliefs about the inherent capacity or not of  
50 women to give birth safely if left to labour without technical intervention, and the  
51  
52  
53  
54  
55  
56  
57  
58  
59  
60



1  
2  
3 strength of professional teamwork in local contexts and as advocated in national  
4 guidelines.  
5

6  
7  
8 **Fear of blame and recrimination.** In eight studies[45,54-55,57-58,61,63-64] health  
9 professionals reported feelings of fear associated with the risk of poor perinatal  
10 outcomes following vaginal delivery, threats to their professional identity arising from  
11 seeking a second-opinion, and a general fear of litigation. They acknowledged that  
12 these prompted the early clinical decision to default to CS,[55,57,58,61] as evident in  
13 this quote from a Nicaraguan specialist: “[*The number one priority... is the fear of*  
14 *medico-legal problems because we didn't do a cesarean section.*”[61:p.2385] Within  
15 studies, resistance to defensive practice was also reported: “*I just think it's a bunch*  
16 *of crap that you have to change your practice when you know something is safe*  
17 *because somebody might sue you*”(USA midwife).[58:5] Across most studies the  
18 extent of actual experience of a lawsuit was unclear. In a study from Tanzania,  
19 where fear of litigation was given as a rationale for medically unjustified CSs, no  
20 participant had personal experience of being sued.[63] It seemed that the practice  
21 was more about defending against such a situation ever arising in the future: “*If the*  
22 *woman went to CS and she comes out safe and the baby is safe, there is no very big*  
23 *harm in that. Despite that the indication was not appropriate... It is not so bad*  
24 *compared to if CS was supposed to be done and it was not done in time.*” [63:p236]  
25  
26  
27  
28  
29  
30  
31  
32  
33  
34  
35  
36

37 **Value attached to financial rewards associated with CS.** Some health  
38 professionals were outspoken about the economic incentives for CS, perceiving  
39 some practices to be tantamount to “*selling caesareans.*”[58:p6] While some doctors  
40 considered CS involved more work, justifying greater payment, others blamed  
41 financial incentives for CS, while others were open about valuing the extra income  
42 provided by undertaking CS.[45,47,55,57-58,60-61,63] There were critical comments  
43 from both doctors and midwives relating to insufficient income for the time spent with  
44 labouring women, and for vaginal birth, by comparison to the time needed and  
45 financial rewards for undertaking CS. In Iran, it was suggested that the “*the paying*  
46 *system should be changed completely. Paying physicians a definite salary rather*  
47 *than based on the number of cases they visit, would change the condition*  
48 *significantly.*”[57:p4] However, another specialist in the same study said “*I won't do it*  
49 *(vaginal delivery), even if I'm paid 10 times more.*” [57:p.4] The balance of financial  
50  
51  
52  
53  
54  
55  
56  
57  
58  
59  
60



1  
2  
3 reward with the convenience of the operation isn't clear, but favourable attitudes to  
4 these two factors were linked in several studies[57-58,60-61,63] as evident in this  
5 quote "*with CS I minimize my time and I earn more!*"[63:p.235]  
6  
7

8  
9 **Preferences for CS as convenient.** In seven studies[46,57-61,63] health  
10 professionals noted the convenience of CS compared to vaginal birth. For women  
11 with a previous CS, one community obstetrician in the USA said "*it's easier to do a*  
12 *repeat C-section*"[58:p6] while another community obstetrician in the same study  
13 suggested "*it's much easier for us to schedule a C-section, but if it's [VBAC]*  
14 *something that the patient wants, then we certainly give them that*  
15 *opportunity.*"[58:p6] In Iran, Nicaragua, and Tanzania the use of CS to avoid night  
16 pressures was acknowledged.[57,61,63] One Iranian specialist was disinclined to  
17 "*revisit my patient in the hospital at 10 pm to carry out a vaginal delivery.*"[57:p.4] In  
18 Nicaragua, another overburdened local-level provider said "*We know that cesarean*  
19 *section is not indicated in low-risk pregnancy, but to avoid the night pressure and the*  
20 *work during the night.*"[61:p.2385] Some health professionals believed that CS was  
21 more convenient for women, describing the availability of extended family support  
22 during birth, father's work schedule, and dates of deployment overseas for military  
23 families.[59]  
24  
25  
26  
27  
28  
29  
30  
31  
32  
33  
34

35 **Beliefs about women.** In 15 studies health professionals talked about women as  
36 key to rising CS rates for psychological, physiological and social reasons.[45-47,54-  
37 61,63-66] Health professionals believed women are now less prepared for labour,  
38 less confident in their capacity to give birth vaginally, and more likely to demand a  
39 CS due to inadequate antenatal education, increasing fear of vaginal birth, and  
40 decreasing tolerance of labour pain, coupled with increasing rates of obesity,  
41 sedentary lifestyles and "*western diseases.*"[63:p.235] There was also the  
42 suggestion "*C-section is becoming more common and stylish these days.*"[57:p.11]  
43 What women want and why was perceived to be influenced by family and friends,  
44 the media, and interactions with (other) health professionals.  
45  
46  
47  
48  
49  
50  
51  
52

53 **Dysfunctional teamwork within the medical profession and the marginalization**  
54 **of midwives.** Unsupportive medical hierarchies, communication barriers, and  
55 difficult relationships between specialists and residents, and midwives and doctors  
56  
57  
58  
59  
60

1  
2  
3 were perceived as contributing to high CS rates in all settings.[47,55-63,65] In  
4 Ireland, support from the family doctor (GP) from the outset of a woman's pregnancy  
5 was reported as crucial to the outcome of trial of VBAC: "*If the GP will support you,*  
6 *then you are in business*".[65:p.4] In Iran and the USA midwives and obstetricians  
7 spoke passionately about the marginalization of midwives and, about the  
8 counterproductive effect of their exclusion from guideline creation[57] and  
9 content.[58] Midwives and residents mentioned the presence of strict hierarchies as  
10 troublesome barriers to optimal care for women.[47,57,63] Where these strong  
11 hierarchical structures existed, and in contexts where junior medical staff expected  
12 to be scolded for unnecessary questions or for mistakes, specialists acknowledged  
13 that juniors were reluctant to seek their opinion.[63]  
14  
15  
16  
17  
18  
19  
20  
21

### 22 **Theme 3: Negotiation within the system (5 SoFs)**

23  
24 The third theme captures how health professionals actively negotiate care within the  
25 health system, and how this impacts on the effectiveness of interventions to reduce  
26 unnecessary CS.  
27  
28  
29

30  
31 **Organisation of care.** From all resource settings, health professionals expressed  
32 concerns that the current organisation of care in their country was insufficiently  
33 resourced.[47,55-59,61-63,65] In LICs, peripheral hospitals were described as  
34 overcrowded, under-equipped, and under-staffed,[63] with not enough nurses or  
35 midwives to care for women during labour.[56] In MICs, CS was acknowledged as a  
36 way to compensate for insufficient time for antenatal counselling, lack of emergency  
37 care,[61] lack of labour facilities or a lack of midwives,[57] as well as being  
38 convenient for physicians and a valued source of revenue for individuals or  
39 facilities.[57,61] However, while staff shortages were reported in HICs,[47,62]  
40 changes to the organisational culture of caring in the UK were reported to address  
41 CS rates without additional resource.[62]  
42  
43  
44  
45  
46  
47  
48  
49

50  
51 **Beliefs about the need for high-level infrastructures.** In 14 studies health  
52 professionals talked about the infrastructure required to provide safe care during  
53 labour and vaginal birth in general, and VBAC in particular.[47,54-66] The need for  
54 modern user-friendly equipment in hospitals was a recurrent concern in LICs.[56,63]  
55  
56  
57  
58  
59  
60

1  
2  
3 In HICs all of the hospitals in one study reported using professional guidelines  
4 (ACOG) as the defining standard of care for VBAC.[58] Professionals in the hospitals  
5 talked about how the mundane details of operationalising specific aspects of care  
6 made the difference between whether or not VBAC was actually achievable.  
7 Immediately available access to senior staff skilled in the provision of emergency  
8 care in one hospital meant “*we cannot leave the facility*”; in another “*within 10*  
9 *minutes from the unit [labour and delivery]*”; and another no “*dedicated anaesthesia*  
10 *provider for L&D [labor and delivery]*” meant “*we’re not able to offer a VBAC.*”[58:p6]  
11  
12  
13  
14  
15

16  
17 **Training, skills and experience.** Reluctance on the part of some professionals to  
18 implement guidelines or programmes targeted at them to reduce CS stemmed from  
19 insufficient training and experience, or past experience of a bad outcome.[45,47,55-  
20 57,59,61,65-66] Concerns were voiced about the younger generation of health  
21 professionals (residents and midwives) who were felt to be ill-equipped with the  
22 requisite skills in labour and vaginal birth.[57,61,65] In an Iranian study “*residents*  
23 *learn[t] the process of natural delivery during the first year but by the time they have*  
24 *learned how to deal with physiologic labor, the year ends and a new unskilled group*  
25 *becomes responsible for the whole thing*” and “*Many first year residents transfer*  
26 *mothers from labor rooms for a C-section as they need to learn C-section before*  
27 *entering the second year.*”[57:p7] The importance of training in labour and vaginal  
28 birth before professional accreditation and continued professional development was  
29 evident. In two Canadian studies,[55,59] obstetricians identified the importance of  
30 *educational workshops focusing on the recommendations in practice to make the*  
31 *guidelines more acceptable and useful to health professionals.*[55:p795]  
32  
33  
34  
35  
36  
37  
38  
39  
40  
41  
42

43 **Views about the format, content and delivery of interventions.**[55,57,59,61-63]  
44 Health professional *buy-in* was a process that had to be continuously  
45 negotiated,[59,62] without fear of blame or threat to professional identity.[62,63]  
46 Health professionals also wanted the tone of guidance to be reflective, rather than  
47 dictatorial. Language mattered, in particular avoiding words such as ‘should’,  
48 ‘developmental’ or ‘pilot.’[59] Some health professionals described how important it  
49 was for local opinion leaders to personally endorse projects.  
50  
51  
52  
53  
54  
55  
56  
57  
58  
59  
60

1  
2  
3 **Beliefs about the clinical encounter and autonomous decision-making.**[44-  
4 47,54-55,57-59,61-64,66] Organisations that accept CS on maternal request have  
5 higher CS rates.[62] Some health professionals reported that a woman's preference  
6 for a CS greatly influenced their clinical-decision making.[45,61] In one study of three  
7 countries with high VBAC rates it was believed that, while women should participate  
8 in decision-making, only professionals can make the final decision, based on medical  
9 knowledge.[64] Short appointments limiting the time available to discuss birth options  
10 and build a trusting relationship were reported in HICs,[66] and inadequate postnatal  
11 debriefing after a woman's first CS was believed to be associated with maternal  
12 choice for repeat CS.[54] Where teams had a shared approach to the clinical  
13 encounter, informed decision-making was more likely to happen irrespective of who  
14 made the final decision, and everyone involved was reassured by the process. This  
15 required time.  
16  
17  
18  
19  
20  
21  
22  
23  
24  
25

### 26 **Line of argument synthesis**

27  
28 Health professionals' accounts revealed the synergy between their underpinning  
29 philosophy of birth (as inherently normal or pathological), their social and cultural  
30 context, and the extent to which they were enabled and prepared to negotiate within  
31 the local health and cultural system context and resources to reduce CS rates.  
32 These values and preferences influenced their receptiveness to interventions and,  
33 potentially, the effectiveness of the intervention itself. Supplementary file 6  
34 represents this in a figure. The mechanisms of effect for change or resistance to  
35 change appeared to include prior beliefs; willingness or not to engage with change,  
36 especially where this entailed potential loss of income or status including the risk of  
37 litigation; and capacity or not to influence local community and health care norms  
38 and values relating to CS provision.  
39  
40  
41  
42  
43  
44  
45  
46  
47  
48  
49

## 50 **DISCUSSION**

51 This qualitative evidence synthesis identified fourteen Summary of Findings,  
52 resulting in three core themes: *Philosophy of birth* (4 SoFs); 2) *Social and cultural*  
53 *context* (5 SoFs); and 3) *Negotiation within system* (5 SoFs). The consequent line of  
54 argument was supported by the peripheral literature,[41,68-82] and includes three  
55  
56  
57  
58  
59  
60

1  
2  
3 potential mechanisms of effect for change. These are: *prior beliefs about whether*  
4 *labour and birth are fundamentally physiological or pathological; willingness or not to*  
5 *engage with changing local practice norms, especially where this entails potential*  
6 *loss of income or status; and capacity or not to influence local community and health*  
7 *care systems and structures relating to maternity care provision.* Based on our  
8 CERQual assessments of all fourteen SoFs, we have the most confidence in core  
9 theme two, which shows how social and cultural context shape health professionals  
10 attitudes to change. Within theme one, low confidence in the SoF reporting beliefs  
11 about what constitutes necessary and unnecessary suggests further exploration is  
12 warranted into the ambiguities surrounding what health professionals may classify as  
13 necessary and unnecessary caesareans.  
14  
15  
16  
17  
18  
19  
20  
21

### 22 **Strengths and weaknesses of the study**

23 To the best of our knowledge this is the first global qualitative evidence synthesis that  
24 addresses health professional's views of specific interventions targeted at them to  
25 reduce unnecessary CS. Our sensitive search strategy optimises the likelihood that  
26 we have identified relevant studies published in the time period in principal journals  
27 in English and other languages. The findings included the views and experiences of  
28 obstetricians, midwives, and general practitioners from high, middle and low income  
29 countries, and countries with both high and low rates of caesarean section. Quality  
30 scores for included studies were generally high or moderate. There was high or  
31 moderate confidence on the CERQual measure for 11 Summaries of Findings.  
32 However, we only had data from one Asian country (China), one Middle Eastern  
33 country (Iran) and one South American country (Nicaragua). All of these regions  
34 have very high rates of CS.  
35  
36  
37  
38  
39  
40  
41  
42  
43  
44

### 45 **Strengths and weaknesses in relation to other studies**

46 In comparison to surveys of health professional practice, our qualitative review  
47 provides more nuanced explanations for why interventions designed to change  
48 health professionals practice may or may not work. For instance, a survey  
49 associated with a cluster RCT of Brazilian doctors' perspective on seeking a second  
50 opinion strategy before undertaking CS found that around half of the participants  
51 thought the strategy might be effective locally, though far fewer thought this would be  
52 the case in private as opposed to public hospitals.[67] Our review reinforces this  
53  
54  
55  
56  
57  
58  
59  
60

1  
2  
3 finding, but also provides more detailed insights into why this situation might occur,  
4 since it shows that seeking a second opinion brings fear of recrimination that could  
5 undermine professional identities and career progression, and it threatens loss of  
6 income, challenges power structures, and risks exposing over-use of CS for financial  
7 gain. Our review also resonates with the findings of studies that interpret maternity  
8 cultures as being the outcome of social processes and practices, exposing the  
9 disjuncture between what is supposed to happen and what actually happens when  
10 national and international policy measures are implemented in local contexts.[48,83-  
11 85] Our review further identifies the degree to which health professionals manipulate  
12 the kind of evidence they use to reinforce their arguments for or against action on  
13 high CS rates.[83] This indicates that beliefs and values are the key arbiter of  
14 intention to change behaviour, regardless of the wider system pressures, and despite  
15 knowledge of the evidence base.[83,85-86] Our findings therefore reinforce  
16 arguments that simply providing good quality evidence to health care providers will  
17 not influence practice change.  
18  
19  
20  
21  
22  
23  
24  
25  
26  
27  
28

### 29 **Implications for clinicians and policy makers**

30 The three mechanisms of effect we have identified are aligned with the three key  
31 domains of general behavioural change theory.[87-88] This theory has a number of  
32 forms, but in general, it can be summarised as *'my behaviour depends on what I*  
33 *believe is right to do; what is normal to do around here; and what is under my control*  
34 *to do'*. Changing the behaviours of health professionals and policy makers therefore  
35 demands action in these three areas. First, health professionals need to believe that  
36 they, personally, are performing unnecessary CS, and that physiological labour and  
37 vaginal birth has an intrinsic value. Second, health care providers need to be brought  
38 together in intra and interprofessional groups, to discuss and agree how to change  
39 local norms about practice decisions in various labour and birth scenarios. This may  
40 include development of skills in self-reflection, and targeted continuing professional  
41 education (CPD). Third, health professionals need to be enabled within their  
42 healthcare system, to address barriers that include the relative status and power of  
43 various professional groups, the quality (or not) of clinician-patient relationships,  
44 medico-legal concerns, monetary gain, and efficiency concerns. Evidence of the  
45 impact of changes in these three areas is currently emerging in China.[89] The  
46 present review also suggests that whilst concerns about under resourced maternity  
47  
48  
49  
50  
51  
52  
53  
54  
55  
56  
57  
58  
59  
60



1  
2  
3 services are reported across high, middle and low income countries, there are  
4 specific challenges and clinical implications of CS use in low and middle income  
5 countries where antenatal care can be insufficient, the environment, equipment and  
6 care during labour may be inadequate and access to emergency care is limited.  
7  
8  
9

### 10 **Unanswered questions and future research**

11 The potential mechanisms of effect arising from this study should be integrated with  
12 the findings from qualitative evidence synthesis reviews of the views and  
13 experiences of women and communities[90] and of those working at the level of  
14 organisations, facilities and systems.[91] The integrated mechanisms of effect should  
15 then be used to design implementation interventions to reduce the overuse of CS,  
16 based on participative and action orientated research designs that involve all  
17 relevant stakeholders, and that take account of local context. In settings where there  
18 are rapidly rising CS rates, and where there was lower confidence for the summaries  
19 of findings in this review (such as South Asia and South America) further in-depth  
20 qualitative studies are needed to establish how far our findings are applicable locally,  
21 before intervention programmes are introduced in such settings.  
22  
23  
24  
25  
26  
27  
28  
29  
30

### 31 **CONCLUSION**

32 Change programmes for health professionals need to act on personal beliefs, local  
33 norms, and control beliefs to be effective. This review provides detailed insights into  
34 the particular factors that enhance or resist reduction in unnecessary CS from the  
35 point of view of health professionals in low, middle and high income countries from  
36 around the world, including those with both very low and very high rates of CS. For  
37 maternity care professionals, there is a synergistic relationship between their  
38 underpinning philosophy of birth, the social and cultural context they are working  
39 within, and the extent to which they are prepared and able to negotiate changes to  
40 health system structures and resources. To maximise the chance of success, the  
41 proposed mechanisms of effect resulting from this study, and from parallel reviews of  
42 the views and experiences of service users and of those working at the level of  
43 organisations, facilities, and systems, should be built in to future change  
44 programmes designed to reduce unnecessary CS.  
45  
46  
47  
48  
49  
50  
51  
52  
53  
54  
55  
56  
57  
58  
59  
60



## Figure legends

Figure 1: PRISMA Diagram

**Author contributions:** APB and CK designed the review with input from SD. CK and SD conducted the searches, identification and screening with agreement by consensus of all authors on final inclusions. CK extracted data, with CK and SD agreeing initial, emergent and final themes. CK, SD and APB all contributed to writing the paper. All authors read and approved the final manuscript.

**Data sharing statement:** This is a qualitative evidence synthesis. Original research data is contained in the included studies. Data interpretation is contained in the manuscript. Further information can be obtained from the corresponding author.

**Acknowledgements:** Qian Long for her native-tongue translation and interpretation of Chinese papers into English language. Newton Opiyo for his contributions to enhance the synergy between this qualitative evidence synthesis and the Cochrane Review of Non-clinical interventions to reduce unnecessary caesarean section. Meghan Bohren for continuing support and discussion about qualitative evidence synthesis and the GRADE-CERQual method for assessing confidence in findings.

## References

1. World Health Organization. WHO Statement on Caesarean Section Rates. WHO/RHR/15.02; 2015.
2. Lumbiganon P, Laopaiboon M, Gulmezoglu AM, Souza JP, Taneepanichskul S, Ruyan P, et al. Method of delivery and pregnancy outcomes in Asia: the WHO global survey on maternal and perinatal health 2007–08. *Lancet* 2010;375:490–9.
3. Souza JP, Gulmezoglu A, Lumbiganon P, Laopaiboon M, Carroli G, Fawole B, et al. Caesarean section without medical indications is associated with an increased risk of adverse short-term maternal outcomes: the 2004–2008 WHO Global Survey on Maternal and Perinatal Health. *BMC medicine* 2010;8:71.
4. World Health Organisation. Appropriate technology for birth. *Lancet* .1985
5. Betran AP, Ye J, Moller AB, Zhang J, Gülmezoglu AM, Torloni MR. The increasing trend in caesarean section rates: Global, regional and national estimates: 1990–2014. *PLoS One* 2016;11(2): e0148343.
6. Leal MdC. Nascer no Brasil: Inquerito Nacional sobre Parto e Nascimento. 2014.

7. Boatin AA, Schlottheuber A, Betran AP, Moller AB, Barros AJD, Boerma T, Torloni MR, Victora CG, Hosseinpoor AR. Within country inequalities in caesarean section rates: observational study of 72 low and middle income countries. *BMJ* 2018;Jan 24;360:k55.
8. <https://www.bmj.com/too-much-medicine> accessed 27th June 2018.
9. <http://www.choosingwisely.org/> accessed 27<sup>th</sup> June 2018.
10. Miller S, Abalos E, Chamillard M, Ciapponi A, Colaci D, Comandé D, Diaz V, Geller S, Hanson C, Langer A, Manuelli V, Millar K, Morhason-Bello I, Castro CP, Pileggi VN, Robinson N, Skaer M, Souza JP, Vogel JP, Althabe F. Beyond too little, too late and too much, too soon: a pathway towards evidence-based, respectful maternity care worldwide. *Lancet* 2016;388:2176–92.
11. Eshaug AG, Rosenthal MB, Lavis JN, Brownlee S, Schmidt H, Nagpal S, Littlejohns P, Srivastava D, Tunis S, Saini V. Levers for addressing medical underuse and overuse: achieving high-value health care. *Lancet* 2017;390:191-202
12. Johanson R, Newburn M, Mcfarlane A. Has the medicalisation of childbirth gone too far? *BMJ* 2002;324:892.
13. Robson MS. Classification of caesarean sections. *Fetal and Maternal Medicine Review* 2001;12(1):23-39.
14. Pyykönen A, Gissler M, Løkkegaard E, Bergholt T, Rasmussen SC, Smáráson A, Bjarnadóttir RI, Másdóttir BB, Kállén K, Klungsoyr K, Albrechtsen S, Skjeldestad FE, Tapper AM. Cesarean section trends in the Nordic Countries - a comparative analysis with the Robson classification. *Acta Obstet Gynecol Scand* 2017;96(5):607-616.
15. Vogel JP, Betran AP, Vindevoghel N, Souza JP, Torloni MR, Zhang J, Tuncalp O, Mori R, Morisaki N, Ortiz-Panozo E et al: Use of the Robson classification to assess caesarean section trends in 21 countries: a secondary analysis of two WHO multicountry surveys. *The Lancet Global health* 2015;3(5):e260-270.
16. Torloni MR, Betrán AP, Montilla P, Scolaro E, Seuc A, Mazzoni A, Althabe F, Merzagora F, Donzelli GP, Meriardi M. Do Italian women prefer cesarean section? Results from a survey on mode of delivery preferences. *BMC Pregnancy Childbirth* 2013;13:78.
17. Bettes BA, Coleman VH, Zinberg S, Spong CY, Portnoy B, DeVoto E, Schulkin J. Cesarean delivery on maternal request: obstetrician-gynecologists' knowledge, perception, and practice patterns. *Obstet Gynecol* 2007;109(1):57-66.
18. Munro S, Kornelsen J, Corbett K, Wilcox E, Bansback N, Janssen P. Do Women Have a Choice? Care Providers' and Decision Makers' Perspectives on Barriers to Access of Health Services for Birth after a Previous Cesarean. *Birth* 2017;44(2):153-160.
19. Sharpe AN, Waring GJ, Rees J, McGarry K, Hinshaw K. Cesarean section at maternal request: the differing views of patients and healthcare professionals: a questionnaire based study. *Eur J Obstet Gynecol Reprod Biol* 2015;192:54-60
20. Gabbe GS, Holzman GB. Obstetricians' choice of delivery. *Lancet* 2001;357:722
21. Jacquemyn Y, Ahankour F, Martens G. Flemish obstetricians' personal preference regarding mode of delivery and attitude towards caesarean section on demand. *Eur J Obstet Gynecol Reprod Biol* 2003;111:164-6.
22. Backe B, Salvesen KA, Sviggum O. Norwegian obstetrician prefer vaginal route of delivery. *Lancet* 2002;359:629.
23. Does van der J, Roosmalen van J. Obstetricians' choice of delivery. *Eur J Obstet Gynaecol Reprod Biol* 2001;99:139
24. Lavender T, Kingdon C, Hart A, Gyte G, Gabbay MB, Neilson JP. Could a randomised trial answer the controversy relating to elective caesarean section? National survey of consultant obstetricians and heads of midwifery. *BMJ* 2005;331: 490-491.

25. Habiba M, Kaminiski M, Da Fre M, Marsal K, Bleker O, Librero J, Granjean H, Gratia P, Guaschino S, Heyl W, Taylor D, Cuttini M. Caesarean section on request: a comparison of obstetricians' attitudes in eight European countries. *BJOG* 2006;113(6):647-656.
26. Grytten J, Skau I, Sorensen R. The impact of the mass media on obstetricians' behavior in Norway. *Health Policy* 2017;121(9): 986-93.
27. Localio AR, Lawthers AG, Bengtson JM, et al. Relationship between malpractice claims and cesarean delivery. *JAMA* 1993;269(3):366-73.
28. Khunpradit S, Tavender E, Lumbiganon P, Laopaiboon M, Wasiak J, Gruen RL. Non-clinical interventions for reducing unnecessary caesarean section. *Cochrane Database of Systematic Reviews* 2011, Issue 6. Art. No.: CD005528. DOI: 10.1002/14651858.CD
29. Chen I, Opiyo N, Tavender E, Mortazhejri S, Rader T, Petkovic J, Yogasingam S, Taljaard M, Agarwal S, Laopaiboon M, Wasiak J, Khunpradit S, Lumbiganon P, Gruen RL, Betran AP. Non-clinical interventions for reducing unnecessary caesarean section. *Cochrane Database of Systematic Reviews* 2018, Issue 9. Art. No.: CD005528. DOI: 10.1002/14651858.CD005528.pub3
30. Noblit GW, Hare RD. *Meta-ethnography: Synthesizing Qualitative Studies*. 1st ed. Thousand Oaks, California: Sage Publications; 1988.
31. Kingdon C, Downe S, Betrán AP. The use of interventions to reduce unnecessary caesarean sections targeted at healthcare professionals: a qualitative evidence synthesis. *PROSPERO* 2017 CRD42017059455
32. Moher D, Liberati A, Tetzlaff J, Altman DG, The PRISMA Group (2009). Preferred Reporting Items for Systematic Reviews and Meta-Analyses: The PRISMA Statement. *PLoS Med* 6(7): e1000097. doi:10.1371/journal.pmed1000097
33. Noyes J, Hannes K, Booth A, Harris J, Harden A, Popay J, Pearson A, Cargo M, and Pantoja T on behalf of the Cochrane Qualitative and Implementation Methods Group. Chapter 20: Qualitative research and Cochrane reviews. In: Higgins JPT, Green S (editors), *Cochrane Handbook for Systematic Reviews of Interventions Version 5.3.0* (updated October 2015). The Cochrane Collaboration, 2015. Available from <http://qim.cochrane.org/supplemental-handbook-guidance>
34. Booth A. Searching for qualitative research for inclusion in systematic reviews: a structured methodological review. *Systematic Reviews* 2016;5:74. DOI 10.1186/s13643-016-0249-x
35. Wilczynski NLMS, Hayes RB. Search strategies for identifying qualitative studies in CINAHL. *Qual. Health Res* 2007;17:705-710.
36. Wong SSWN, Hayes RB. Developing optimal search strategies for detecting clinically relevant studies in MEDLINE. *Stud Health Technol Inform* 2004;107:311-316.
37. Walters LA, Wilczynski NLMS, Hayes RB. Developing Optimal Search Strategies for Retrieving Clinically Relevant Qualitative Studies in EMBASE. *Qual Health Res* 2006; 16:162-8
38. McKibbin KAWN, Hayes RB. Developing optimal search strategies for retrieving qualitative studies in PsycINFO. *Eval Health Prof.* 2006;29:440-454.
39. Chaillet N, Dumont A. Evidence-based strategies for reducing cesarean section rates: a meta-analysis. *Birth* 2007;34:53-64.
40. Hartmann KE, Andrews JC, Jerome RN, Lewis RM, Likis FE, McKoy JN, et al.. Strategies to Reduce Cesarean Birth in Low-Risk Women [Internet]. Rockville (MD): Agency for Healthcare Research and Quality (US). AHRQ Comparative Effectiveness Review 2012; Report No.: 12(13)-EHC128-EF.

- 1
  - 2
  - 3
  - 4
  - 5
  - 6
  - 7
  - 8
  - 9
  - 10
  - 11
  - 12
  - 13
  - 14
  - 15
  - 16
  - 17
  - 18
  - 19
  - 20
  - 21
  - 22
  - 23
  - 24
  - 25
  - 26
  - 27
  - 28
  - 29
  - 30
  - 31
  - 32
  - 33
  - 34
  - 35
  - 36
  - 37
  - 38
  - 39
  - 40
  - 41
  - 42
  - 43
  - 44
  - 45
  - 46
  - 47
  - 48
  - 49
  - 50
  - 51
  - 52
  - 53
  - 54
  - 55
  - 56
  - 57
  - 58
  - 59
  - 60
41. Weaver JJ, Statham H, Richards M. Are there “unnecessary” caesarean sections? Perceptions of women and obstetricians about caesarean sections for non-clinical indications. *BIRTH* 2007;34:32-41.
42. Clara Bermúdez-Tamayo, Mira Johri, Francisco Jose Perez-Ramos, Gracia Maroto-Navarro, Africa Caño-Aguilar, Leticia Garcia-Mochon et al Evaluation of quality improvement for cesarean sections programmes through mixed methods. *Implementation Science* 2014;(9):182.
43. Kaboré C, Ridde V, Kouanda S, Queuille L, Somé PA, Agier I et al. DECIDE: a cluster randomized controlled trial to reduce non-medically indicated caesareans in Burkina Faso. *BMC Pregnancy and Childbirth* 2016;16:322.
44. Chen Y, Lu W, Zhang YF. Informed choice and autonomy of decision making on caesarean section in China. *Maternal and Child Health Care of China* 2008;23:89-92. (Chinese).
45. Liu L, Tao FB, Huang K. Qualitative study on affecting factors of continuing increasing in caesarean section rate in rural area. *Modern Preventive Medicine*. 2010; 37: 3865-9. (Chinese).
46. Wang N, Ding Y. Reasons for obstetric medial staff choosing cesarean section for themselves in the absence of medical indications: a qualitative study. *Journal of Nursing Science* 2013;28(6):39-41. (Chinese).
47. Melman S, Schreurs RHP, Dirksen CD, Kwee A, Nijhuis JG, Smeets NAC, Scheepers HCJ, Hermens RPMG. Identification of barriers and facilitators for optimal cesarean section care: perspective of professionals. *BMC Pregnancy and Childbirth* 2017;17:230.
48. Belizan M, Meier A, Althabe F, Codazzi A, Colomar M, Buekens P, Belizan J, Walsh J, Campbell MC. Facilitators and barriers to adoption of evidence-based perinatal care in Latin American hospitals: a qualitative study. *Health Education Research* 2007: doi:10.1093/her/cym012
49. Walsh D, Downe S. Appraising the quality of qualitative research. *Midwifery*. 2006;22: 108–19.
50. Lewin S, Bohren MA, Rashidian A, Munthe-Kaas H, Glenton C, Colvin CJ, Garside R, Noyes J, Tunçalp O, Wainwright M, Flottorp S, Tucker JD, Carlsen B. Applying the GRADE-CERQual approach: making an overall CERQual assessment of confidence and creating a Summary of Qualitative Findings table. *Implementation Science*. 2018;13:2.
51. Lewin S, Glenton C, Munthe-Kaas H, Carlsen B, Colvin CJ, Gulmezoglu M, Noyes J, Booth A, Garside R, Rashidian A: Using qualitative evidence in decision making for health and social interventions: an approach to assess confidence in findings from qualitative evidence syntheses (GRADE-CERQual). *PLoS Medicine* 2015;12( 10): e1001895.
52. Finlayson K, Downe S (2013) Why do women not use antenatal services in low-income and middle-income countries? A meta-synthesis of qualitative studies. *PLoS Med* 10(1):e1001373. pmid:23349622
53. Kingdon C, Neilson J, Singleton V, Gyte G, Hart A, Gabbay M, Lavender, T. Choice and birth method: Mixed-method study of caesarean delivery for maternal request. *BJOG* 2009;116:886–895.
54. Kamal P, Dixon-Woods M, Kurinczuk JJ, Oppenheimer C, Squire P, Waugh J. Factors influencing repeat caesarean section: qualitative exploratory study of obstetricians' and midwives' accounts. *BJOG* 2005; 112: 1054-1060.

- 1  
2  
3 55. Chaillet N, Dube E, Dugas M, Francoeur D, Dube J, Gagon S, Poitras, Dumont A.  
4 Identifying barriers and facilitators towards implementing guidelines to reduce  
5 caesarean section rates in Quebec. *Bulletin of the World Health Organization* 2007  
6 85;10:791-797.
- 7 56. Wanyonyi SZ, Mukaindo AM, Stones W. Perspectives on the practice of vaginal birth  
8 after caesarean section in East Africa. *East African Medical Journal* 2010;87(8):335-  
9 339.
- 10 57. Yazdizadeh B, Nedjat S, Mohammad K, Rashidian A, Changizi N, Majdzadeh R.  
11 Cesarean section rate in Iran, multidimensional approaches for behavioral change of  
12 providers: a qualitative study. *BMC Health Services Research* 2011;11:159.
- 13 58. Cox KJ. Providers' perspectives on the vaginal birth after cesarean guidelines in Florida,  
14 United States: a qualitative study. *BMC Pregnancy and Childbirth* 2011; 11:72.
- 15 59. Dunn S, Sprague AE, Fell DB, Dy J, Harrold JA, Lamontagne B, Walker M. The Use of a  
16 Quality Indicator to Reduce Elective Repeat Caesarean Section for Low-Risk Women  
17 Before 39 Weeks' Gestation: The Eastern Ontario Experience. *J Obstet Gynaecol Can*  
18 2013;35(4):306–316.
- 19 60. Lotfi R, Tehrani FR, Dovom MR, Torkestani F, Abedini M, Sajedinejad S. Development  
20 of strategies to reduce cesarean delivery rates in Iran 2012-2014: a mixed methods  
21 study. *Int J Prev Med* 2014;5(12):1552-1556.
- 22 61. Colomar M, Cafferata ML, Aleman A, Castellano G, Elorrio EG, Althabe F, Engelbrecht  
23 S. Mode of Childbirth in Low-Risk Pregnancies: Nicaraguan Physicians' Viewpoints.  
24 *Matern Child Health J* 2014;18:2382–2392.
- 25 62. Marshall JL, Spilby H, McCormick F. Evaluating the 'Focus on Normal Birth and  
26 Reducing Caesarean section Rates Rapid Improvement Programme': A mixed method  
27 study in England. *Midwifery* 2015;31:332–340.
- 28 63. Litorp H, Mgya A, Mbekenga CK, Kidanto HL, Johnsdotter S, Essen B. Fear, blame  
29 and transparency: obstetric caregivers' rationale for high caesarean section rates in low-  
30 resource setting. *Soc Sci Med* 2015;143:232-240.
- 31 64. Lundgren I, Limbeek E, Vehvilainen-Julkunen, Nilsson C. Clinicians' views of factors of  
32 importance for improving the rate of VBAC (vaginal birth after caesarean section): a  
33 qualitative study from countries with high VBAC rates. *BMC Pregnancy and Childbirth*  
34 2015;15:196.
- 35 65. Lundgren I, Healy P, Carroll M, Begley C, Matteredne A, Gross MM, Grylka-Baeschlin S,  
36 Nicoletti J, Morano S, Nilsson, Lalor J. Clinicians' views of factors of importance for  
37 improving the rate of VBAC (vaginal birth after caesarean section): a study from  
38 countries with low VBAC rates. *BMC Pregnancy and childbirth* 2016;16:350.
- 39 66. Foureur M, Turkmani S, Clack DS, Davis DL, Mollart L, Leiser B, Homer CSE. Caring for  
40 women wanting a vaginal birth after previous caesarean section: A qualitative study of  
41 the experiences of midwives and obstetricians. *Women and Birth* 2017; 30:3-8.
- 42 67. Osis MJD, Cecatti JG, Kádúa KS. Brazilian doctors' perspective on the second opinion  
43 strategy before a C-section. *Rev Saude Publica*. 2006;40(2):233-9.
- 44 68. Binfa L, Pantoja L, Ortiz J, Gurovich M, Cavada G. Assessment of the implementation of  
45 the model of integrated and humanised midwifery health services in Santiago. *Midwifery*  
46 2013;29:1151-1157.
- 47 69. Binfa L, Pantoja L, Ortiz J, Gurovich M, Cavada G, Foster J. Assessment of the  
48 implementation of the model of integrated and humanised midwifery health services in  
49 Chile. *Midwifery*. 2016;35:53-61
- 50  
51  
52  
53  
54  
55  
56  
57  
58  
59  
60



- 1  
2  
3 70. Janani F, Kohan S, Taleghani F, Ghafarzadeh M. Challenges to implementing  
4 physiologic birth program (PBP): A qualitative study of midwives' opinions in Iran. *Acta*  
5 *Medica Mediterranea* 2015;31:1373
- 6 71. Kennedy HP, Doig E, Tillman S, Straus A, Williams B, Pettker C, Illuzzi J. Perspectives  
7 on Promoting Hospital Primary Vaginal Birth: A Qualitative Study. *BIRTH* 2016;43:336-  
8 345
- 9 72. Darling F. Practitioners' views and barriers to implementation of the keeping birth normal  
10 tool: A pilot study. *BJM* 2016. <https://doi.org/10.12968/bjom.2016.24.7.508>
- 11 73. Kerrigan A, Kingdon C, Cheyne H. Obesity and normal birth: A qualitative study of  
12 clinican's management of obese pregnant women during labour. *BMC Pregnancy and*  
13 *Childbirth* 2015;15:256.
- 14 74. Cheyne H, Abhyankar P, McCourt C. Empowering change: Realist evaluation of a  
15 Scottish Government programme to support normal birth. *Midwifery* 2013;29:1110-1121.
- 16 75. Hunter B. Implementing a National Policy Initiative to Support Normal Birth: Lessons  
17 from the All Wales Clinical Pathway for Normal Labour. *J Midwifery Womens Health*  
18 2010;55:226–233.
- 19 76. Hunter B, Segrott J. Using a Clinical Pathway to Support Normal Birth: Impact on  
20 Practitioner Roles and Working Practices. *BIRTH* 2010;37:227-235
- 21 77. Hunter B, Segrott J. Renegotiating inter-professional boundaries in maternity care:  
22 implementing a clinical pathway for normal labour. *Sociology of Health & Illness*  
23 2014;36:719–737.
- 24 78. Behuruzi R, Hatem M, Fraser W, Goulet L, li M, Misago C. Facilitators and barriers in  
25 the humanization of birth in Japan. *BMC Pregnancy and Childbirth* 2010;10:25
- 26 79. Kennedy HP, Grant J, Walton C, Shaw-Battista J, Sandall J. Normalizing birth in  
27 England: A qualitative study. *Journal of Midwifery and Women's Health* 2010;55: 262-  
28 269.
- 29 80. Kennedy HP, Grant J, Sandall J. Elective caesarean delivery: A mixed-method  
30 qualitative investigation. *Midwifery* 2013;29:e138-e144
- 31 81. Huang K, Tao FB, Faragher B, Raven J, Tolhurst R, Tang S, van den Broek N. A mixed-  
32 method study of factors associated with differences in caesarean section rates at  
33 community level: The case of rural China. *Midwifery* 2013;29(8): 911-20.
- 34 82. Bagheri A, Masoudi Alavi N, Abbaszadeh F. Iranian obstetricians' views about the  
35 factors that influence pregnant women's choice of delivery method: A qualitative study.  
36 *Women and birth* 2013;26(1):e45-9.
- 37 83. Klein MC, Liston R, Fraser WD, Baradaran N, Hearps, SJC, Tomkinson J, Kaczorowski  
38 J, Brant R and the Maternity Research Group. Attitudes of the new generation of  
39 Canadian Obstetricians: How do they differ from their predecessors? *BIRTH* 38;2:129-  
40 139.
- 41 84. Kvernflaten B. Meeting targets or saving lives: maternal health policy and Millenium  
42 development goal 5 in Nicaragua. *Reproductive Health Matters*. 2013; 21 (42):32-40
- 43 85. Berrow D, Humphrey C, Hayward J. Understanding the relationship between research  
44 and clinical policy: a study of clinicians views. *Quality in Healthcare* 1997; 6:81-186.
- 45 86. Gabbay J, le May A. Evidence based guidelines or collectively constructed "mindlines?"  
46 Ethnographic study of knowledge management in primary care.  
47 *BMJ* 2004;329(7473):1013.
- 48 87. Azjen I. The Theory of Planned Behaviour. *Organizational Behavior and Human*  
49 *Decision Processes* 1991;50(2):179-211.
- 50  
51  
52  
53  
54  
55  
56  
57  
58  
59  
60

- 1
- 2
- 3 88. Fishbein M, Ajzen I. Predicting and Changing Behavior: The Reasoned Action
- 4 Approach. New York: Taylor & Francis, 2010
- 5 89. Liang J, Mu Y, Li X, Tang W, Wang Y, Liu Z, Huang X, Scherpbier RW, Guo S, Li M, Dai
- 6 L, Deng K, Deng C, Li Q, Kang L, Zhu J, Ronsmans C. Relaxation of the one child policy
- 7 and trends in caesarean section rates and birth outcomes in China between 2012 and
- 8 2016: observational study of nearly seven million health facility births. *BMJ* 2018; 360
- 9 doi: <https://doi.org/10.1136/bmj.k817>
- 10
- 11 90. Kingdon C, Betran AP, Downe S. Women's and communities' views of targeted
- 12 educational interventions to reduce unnecessary caesarean section: A qualitative
- 13 evidence synthesis. *Reprod Health* 2018; 24; 15:130
- 14 91. Kingdon C, Betran AP, Downe S. Non-clinical interventions to reduce unnecessary
- 15 caesarean section targeted at organisations, facilities and systems: A qualitative
- 16 evidence synthesis of stakeholders' views. *PLOS One* 2018;13:e0203274
- 17
- 18
- 19
- 20
- 21
- 22
- 23
- 24
- 25
- 26
- 27
- 28
- 29
- 30
- 31
- 32
- 33
- 34
- 35
- 36
- 37
- 38
- 39
- 40
- 41
- 42
- 43
- 44
- 45
- 46
- 47
- 48
- 49
- 50
- 51
- 52
- 53
- 54
- 55
- 56
- 57
- 58
- 59
- 60



1  
2  
3  
4  
5  
6  
7  
8  
9  
10  
11  
12  
13  
14  
15  
16  
17  
18  
19  
20  
21  
22  
23  
24  
25  
26  
27  
28  
29  
30  
31  
32  
33  
34  
35  
36  
37  
38  
39  
40  
41  
42  
43  
44  
45  
46  
47  
48  
49  
50  
51  
52  
53  
54  
55  
56  
57  
58  
59  
60

Figure 1: Process of article selection with inclusion and exclusion criteria

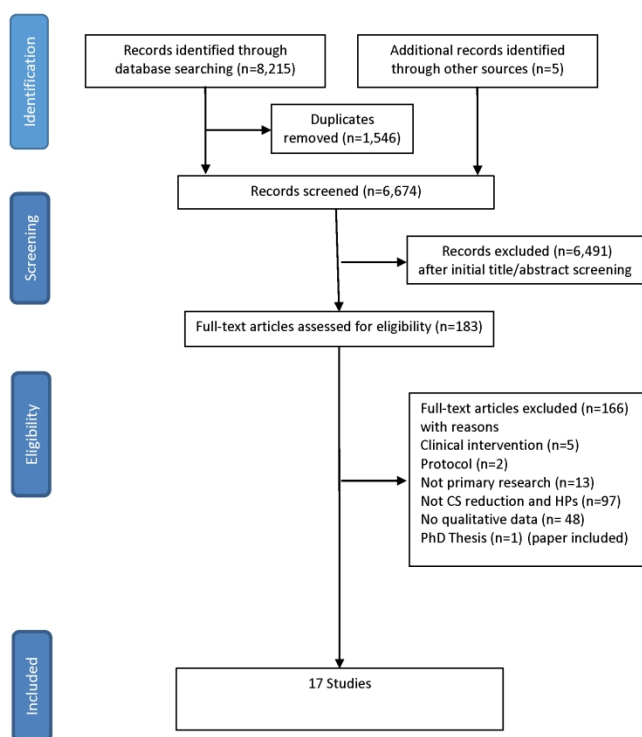

Figure 1: PRISMA Diagram

215x279mm (300 x 300 DPI)

## PROSPERO

### International prospective register of systematic reviews

The use of interventions to reduce unnecessary caesarean sections targeted at healthcare professionals: a qualitative evidence synthesis

*Carol Kingdon, Soo Downe, Ana Betrán*

#### Citation

Carol Kingdon, Soo Downe, Ana Betrán. The use of interventions to reduce unnecessary caesarean sections targeted at healthcare professionals: a qualitative evidence synthesis. PROSPERO 2017 CRD42017059455 Available from: [http://www.crd.york.ac.uk/PROSPERO/display\\_record.php?ID=CRD42017059455](http://www.crd.york.ac.uk/PROSPERO/display_record.php?ID=CRD42017059455)

#### Review question

The aim of this review is to add new evidence of what healthcare professionals think about interventions aimed at reducing unnecessary caesarean sections (including the barriers and facilitators to their use), their beliefs about caesarean section and their commitment to reducing unnecessary caesarean sections: The objectives of the review are to identify, appraise, and synthesize qualitative studies exploring:

1. Health professionals' views, perceptions and uses of educational interventions aimed at improving adherence to evidence-based clinical practices to reduce caesarean sections;
2. Health professionals' views of the perceived benefits, barriers, facilitators and disadvantages of a policy of second opinion for caesarean section to reduce caesarean section rates;
3. Health professionals' views as to how audit, feedback and peer-review can reduce caesarean section rates.

#### Searches

Electronic searches:

We will search the following electronic databases for eligible studies published from 1985 to the date the final search is run:

- CINAHL (EBSCO);
- MEDLINE (EBSCO);
- PsycINFO (EBSCO);
- EMBASE (Ovid);
- Global Index Medicus;
- POPLINE;
- African Journals Online.

Using guidelines developed by the Cochrane Qualitative Research Methods Group for searching for qualitative evidence (Noyes 2011; Booth 2016), and papers detailing strategies for optimising the identification of qualitative studies in CINAHL (Wilczynski 2007), MEDLINE (Wong 2004), EMBASE (Walters 2006) and PsycINFO (McKibbin 2006), we will develop search strategies for each database. We chose these databases as we anticipated that they would provide the highest yield of results based on preliminary, exploratory searches. There will be no geographic restrictions imposed on the search, and the date restriction is intended to ensure that health professional's views and experiences of interventions since the first WHO (1985) statement on appropriate technology for childbirth and use of caesarean section only when necessary are captured.

Searching other resources:

We will search the reference lists of all the included studies and key references (i.e. relevant systematic reviews), both back chaining and forward checking for any additional references not identified in the electronic searches which may be relevant. Key articles cited by multiple authors (citation pearls) will also be checked on Google Scholar, and the authors of relevant published protocols contacted.

#### Types of study to be included

This is a qualitative evidence synthesis, and as such, we will include all studies which have utilized

## PROSPERO

### International prospective register of systematic reviews

qualitative designs (e.g. ethnography, phenomenology) or qualitative methods for data collection (e.g. focus group interviews, individual interviews, observation, diaries, oral histories), and which have used qualitative methods for data analysis (e.g. thematic analysis, framework approach, grounded theory, thematic network analysis). We will also include mixed methods studies where it is possible to extract findings derived from qualitative research. We will exclude studies which collect data using qualitative methods, but which do not perform a qualitative analysis (for example, if qualitative data are only reported using descriptive statistics).

### Condition or domain being studied

The following working definition of unnecessary caesarean sections will be used for the purposes of this review:

'Unnecessary caesarean deliveries are those procedures that are performed in the absence of medical indications such as substantial maternal risk factors, fetal anomalies, pregnancy complications, birth weight < 2500 g or > 4000 g, and complications of labour or delivery (Koroukian 1998). Generally unnecessary caesarean deliveries are those without medical indications in which the mother is exposed to potential harms that outweigh the potential benefits (Kabir 2004).'

### Participants/population

We will include studies that focus on the views and experiences of healthcare professionals. By healthcare professionals we mean:

- Doctors of medicine (including obstetricians and gynecologists, anesthetists, and general physicians);
- Nurses and midwives.

We will focus on studies involving post-registration healthcare professionals.

Studies of medical, nursing and midwifery students and lay health workers will be excluded.

### Intervention(s), exposure(s)

In this review we will define an intervention as 'anything considered by study authors as an intervention additional to usual care undertaken with the aim of reducing unnecessary caesarean section.'

Inclusion criteria:

In accordance with the review objectives, the interventions of particular interest are:

- (1) Educational interventions targeted at healthcare professionals which aim to improve adherence to evidence-based clinical practice known to reduce caesarean sections;
- (2) Second opinion policies for caesarean section indication; and
- (3) Audits, feedback and peer-reviews of caesarean section rates.

Some existing reviews make a distinction between clinical and non-clinical interventions for reducing unnecessary caesarean sections. Clinical interventions which could help to reduce caesarean section rates include external cephalic conversion after 36 weeks, continuous support during labour, and the use of a partogram with a four-hour action line in labour (Khunpradit 2011). In this review we are particularly interested in non-clinical interventions targeted at healthcare professionals to reduce caesarean sections in nulliparous or multiparous women without a previous caesarean section (Robson Groups 1-4) and multiparous women with a previous caesarean section (Robson Group 5).

Exclusion criteria:

We will exclude clinical interventions targeted at health professionals to reduce unnecessary caesarean sections in women with a breech presentation (Robson Groups 6 and 7), multiple pregnancies (Robson Group 8), and those who have transverse or oblique lies (Robson Group 9) or preterm births (Robson Group 10). In addition, interventions targeted at women, communities and the public, and organizations, systems or facilities will be excluded, as they are the subject of two other ongoing reviews.

### Comparator(s)/control

Not applicable.

### Context

We will include studies from any setting globally where an intervention concerning unnecessary caesarean section has been developed, communicated, distributed or implemented from 1985 to 2017. These settings could include public or private health facilities (e.g. hospitals, community clinics), third sector communities

## PROSPERO

### International prospective register of systematic reviews

(e.g. charities) and e- or m-health platforms using internet technology. This time span has been chosen in order to reflect interventions developed since the first WHO statement (WHO 1985).

#### Primary outcome(s)

Studies have shown healthcare professionals' personal preferences and professional practice patterns for planned caesarean section to be varied. They suggest not only that healthcare professionals' views of caesarean sections vary according to gender, profession and socio-clinical environment, but that their views can change over time as professional opinion shifts. Policies on unnecessary caesarean sections are currently in the making and there is an urgent need to understand more about the healthcare professional's views of when or what constitutes an unnecessary caesarean section, and the beliefs which underpin their receptiveness to, or their rejection of, interventions for their reduction. This review will provide that evidence.

#### Secondary outcome(s)

Not applicable.

#### Data extraction (selection and coding)

We will collate records identified from different sources into one database and will remove duplicates. Two review authors (CK, SD) will independently assess each abstract to determine eligibility for inclusion against the a priori inclusion criteria. At this stage, we will disregard those abstracts which are clearly irrelevant to the topic of this review. The same two review authors (CK, SD) will then retrieve the full texts of all the papers that are likely to be relevant, and will independently assess them for relevance, before agreeing on the final list of included studies. In the event of any continuing lack of agreement over the inclusion of a particular study, a third review author (AB) will adjudicate, and if appropriate, we will contact study authors for further information. Study characteristics will be recorded using a form designed specifically for this review. The form will record details of: first study author, date of publication, language, country of study, setting (public, private), context (urban/rural), region (African, Americas, South-East Asian, European, Eastern Mediterranean, Western Pacific), participant group (parity, socio-demographics), the type of intervention received, the theoretical/conceptual perspectives of the study, the research methods, sample size, method of analysis, and the key themes (as recorded by the study authors in each case).

#### Risk of bias (quality) assessment

Our inclusion criteria specify that in order to be included, a study must have used qualitative methods for both data collection and data analysis, which are described in the paper. This criterion constitutes a basic quality threshold, as studies which do not meet this standard will be discarded.

In addition, to assess the methodological quality of included studies, one review author will apply a quality appraisal framework to each study. A second review author will then check for discrepancies. Any disagreements will be resolved through discussion, or by consultation with a third review author. We will use the criteria from Walsh (2006) and the A-D grading of Downe (2007), which includes an assessment of the study scope and purpose, design, sampling strategy, analysis, interpretation, researcher reflexivity, ethical dimensions, relevance, and transferability. We will then grade studies against Lincoln and Guba's summary criteria (Lincoln 1985), as follows:

- A: No, or few flaws. The study credibility, transferability, dependability, and confirmability is high.
- B: Some flaws, unlikely to affect the credibility, transferability, dependability, and/or confirmability of the study.
- C: Some flaws that may affect the credibility, transferability, dependability, and/or confirmability of the study.
- D: Significant flaws that are very likely to affect the credibility, transferability, dependability, and/or confirmability of the study.

Two review authors will independently conduct a pilot on three included studies to assess the feasibility of using this tool and to evaluate the integrity of the assessment, any disagreements being resolved by consensus. As previously stated, studies meeting the inclusion criteria will be included regardless of study quality. Quality assessment scores will be used when judging the relative contributions of each study in the development of explanations and relationships between studies, with the synthesis becoming "weighted" towards the findings of the better quality studies (Glenton 2013).

## PROSPERO

### International prospective register of systematic reviews

We will use the GRADE Confidence in the Evidence from Reviews of Qualitative research (GRADE-CERQual) approach to assess the confidence that may be placed in review findings (Lewin 2015) by applying the following four domains:

- Methodological limitations of included studies: the extent to which there are problems in the design or conduct of the primary studies that contributed evidence to a review finding.
- The relevance of the included studies to the review question: the extent to which the body of evidence from the primary studies supporting a review finding is applicable to the context (perspective or population, phenomenon of interest, setting) specified in the review question.
- The coherence of the review findings: the extent to which the review finding is well grounded in data from the contributing primary studies and provides a convincing explanation for the patterns found in these data.
- The adequacy of the data in contributing to the review findings: an overall determination of the degree of richness and quantity of data supporting a review finding.

### Strategy for data synthesis

Following the principles of meta-ethnography (Noblit and Hare 1988), we will undertake data extraction and analysis simultaneously. Meta-ethnography uses an approach based on the constant comparative technique, in which the analysis is built up study by study using the principles of confirmation ('reciprocal analysis') and dis-confirmation ('refutational analysis'). Starting with the earliest published paper, we will read each included study in detail, and will extract the relevant verbatim text, along with the themes/theories/metaphors used by the study authors. Two review authors (CK, SD) will then undertake the analysis, and any disagreements on the thematic structure/theory/amendments will be agreed by consensus throughout the extraction and analysis process. We will synthesize the resultant thematic structure into a 'line of argument' synthesis, before assessing the degree of confidence which can be placed in the evidence from the review findings (CERQual).

### Analysis of subgroups or subsets

Our data management and synthesis plan is intended to support the following sub-analysis:

Data from low- and middle-income countries, and those from high-income countries.

We propose this sub-analysis due to differences in uptake, health beliefs, and health system accessibility and quality between these two types of settings.

### Contact details for further information

Carol Kingdon

ckingdon@uclan.ac.uk

### Organisational affiliation of the review

World Health Organization

### Review team members and their organisational affiliations

Dr Carol Kingdon. University of Central Lancashire

Professor Soo Downe. University of Central Lancashire

Dr Ana Betrán. World Health Organization

### Anticipated or actual start date

03 January 2017

### Anticipated completion date

28 July 2017

### Funding sources/sponsors

World Health Organization

### Conflicts of interest

None known

## PROSPERO

### International prospective register of systematic reviews

#### Language

English

#### Country

England

#### Stage of review

Review\_Ongoing

#### Subject index terms status

Subject indexing assigned by CRD

#### Subject index terms

Attitude of Health Personnel; Cesarean Section; Delivery of Health Care; Female; Health Personnel; Humans; Parturition; Pregnancy; Unnecessary Procedures

#### Date of registration in PROSPERO

18 May 2017

#### Date of publication of this version

18 May 2017

#### Details of any existing review of the same topic by the same authors

#### Stage of review at time of this submission

| Stage                                                           | Started | Completed |
|-----------------------------------------------------------------|---------|-----------|
| Preliminary searches                                            | Yes     | Yes       |
| Piloting of the study selection process                         | Yes     | Yes       |
| Formal screening of search results against eligibility criteria | No      | No        |
| Data extraction                                                 | No      | No        |
| Risk of bias (quality) assessment                               | No      | No        |
| Data analysis                                                   | No      | No        |

#### Versions

18 May 2017

#### PROSPERO

This information has been provided by the named contact for this review. CRD has accepted this information in good faith and registered the review in PROSPERO. CRD bears no responsibility or liability for the content of this registration record, any associated files or external websites.



### Additional Information (Appendix 0: PRISMA Checklist)

| Section/topic             | #  | Checklist item                                                                                                                                                                                                                                                                                              | Reported on page # |
|---------------------------|----|-------------------------------------------------------------------------------------------------------------------------------------------------------------------------------------------------------------------------------------------------------------------------------------------------------------|--------------------|
| <b>TITLE</b>              |    |                                                                                                                                                                                                                                                                                                             |                    |
| Title                     | 1  | Identify the report as a systematic review, meta-analysis, or both.                                                                                                                                                                                                                                         | 1                  |
| <b>ABSTRACT</b>           |    |                                                                                                                                                                                                                                                                                                             |                    |
| Structured summary        | 2  | Provide a structured summary including, as applicable: background; objectives; data sources; study eligibility criteria, participants, and interventions; study appraisal and synthesis methods; results; limitations; conclusions and implications of key findings; systematic review registration number. | 2                  |
| <b>INTRODUCTION</b>       |    |                                                                                                                                                                                                                                                                                                             |                    |
| Rationale                 | 3  | Describe the rationale for the review in the context of what is already known.                                                                                                                                                                                                                              | 4                  |
| Objectives                | 4  | Provide an explicit statement of questions being addressed with reference to participants, interventions, comparisons, outcomes, and study design (PICOS).                                                                                                                                                  | 5                  |
| <b>METHODS</b>            |    |                                                                                                                                                                                                                                                                                                             |                    |
| Protocol and registration | 5  | Indicate if a review protocol exists, if and where it can be accessed (e.g., Web address), and, if available, provide registration information including registration number.                                                                                                                               | 3,5                |
| Eligibility criteria      | 6  | Specify study characteristics (e.g., PICOS, length of follow-up) and report characteristics (e.g., years considered, language, publication status) used as criteria for eligibility, giving rationale.                                                                                                      | 5-6                |
| Information sources       | 7  | Describe all information sources (e.g., databases with dates of coverage, contact with study authors to identify additional studies) in the search and date last searched.                                                                                                                                  | 5-6                |
| Search                    | 8  | Present full electronic search strategy for at least one database, including any limits used, such that it could be repeated.                                                                                                                                                                               | Supplementary file |
| Study selection           | 9  | State the process for selecting studies (i.e., screening, eligibility, included in systematic review, and, if applicable, included in the meta-analysis).                                                                                                                                                   | 5-6                |
| Data collection process   | 10 | Describe method of data extraction from reports (e.g., piloted forms, independently, in duplicate) and any processes for obtaining and confirming data from investigators.                                                                                                                                  | 6                  |



|                                    |    |                                                                                                                                                                                                                        |                |
|------------------------------------|----|------------------------------------------------------------------------------------------------------------------------------------------------------------------------------------------------------------------------|----------------|
| Data items                         | 11 | List and define all variables for which data were sought (e.g., PICOS, funding sources) and any assumptions and simplifications made.                                                                                  | 5-6            |
| Risk of bias in individual studies | 12 | Describe methods used for assessing risk of bias of individual studies (including specification of whether this was done at the study or outcome level), and how this information is to be used in any data synthesis. | 5-6            |
| Summary measures                   | 13 | State the principal summary measures (e.g., risk ratio, difference in means).                                                                                                                                          | Not applicable |
| Synthesis of results               | 14 | Describe the methods of handling data and combining results of studies, if done, including measures of consistency (e.g., $I^2$ ) for each meta-analysis.                                                              | 6              |

| Section/topic                 | #  | Checklist item                                                                                                                                                                                           | Reported on page #        |
|-------------------------------|----|----------------------------------------------------------------------------------------------------------------------------------------------------------------------------------------------------------|---------------------------|
| Risk of bias across studies   | 15 | Specify any assessment of risk of bias that may affect the cumulative evidence (e.g., publication bias, selective reporting within studies).                                                             | 5-6                       |
| Additional analyses           | 16 | Describe methods of additional analyses (e.g., sensitivity or subgroup analyses, meta-regression), if done, indicating which were pre-specified.                                                         | Not applicable            |
| <b>RESULTS</b>                |    |                                                                                                                                                                                                          |                           |
| Study selection               | 17 | Give numbers of studies screened, assessed for eligibility, and included in the review, with reasons for exclusions at each stage, ideally with a flow diagram.                                          | Figure 1                  |
| Study characteristics         | 18 | For each study, present characteristics for which data were extracted (e.g., study size, PICOS, follow-up period) and provide the citations.                                                             | Table 1                   |
| Risk of bias within studies   | 19 | Present data on risk of bias of each study and, if available, any outcome level assessment (see item 12).                                                                                                | Table 1                   |
| Results of individual studies | 20 | For all outcomes considered (benefits or harms), present, for each study: (a) simple summary data for each intervention group (b) effect estimates and confidence intervals, ideally with a forest plot. | Not applicable            |
| Synthesis of results          | 21 | Present results of each meta-analysis done, including confidence intervals and measures of consistency.                                                                                                  | 7-18 synthesis of results |
| Risk of bias across studies   | 22 | Present results of any assessment of risk of bias across studies (see Item 15).                                                                                                                          | CERQual                   |

|                     |    |                                                                                                                                                                                      |                |
|---------------------|----|--------------------------------------------------------------------------------------------------------------------------------------------------------------------------------------|----------------|
|                     |    |                                                                                                                                                                                      | Table 2 and S2 |
|                     |    |                                                                                                                                                                                      |                |
| Additional analysis | 23 | Give results of additional analyses, if done (e.g., sensitivity or subgroup analyses, meta-regression [see Item 16]).                                                                | Not applicable |
| <b>DISCUSSION</b>   |    |                                                                                                                                                                                      |                |
| Summary of evidence | 24 | Summarize the main findings including the strength of evidence for each main outcome; consider their relevance to key groups (e.g., healthcare providers, users, and policy makers). | 18             |
| Limitations         | 25 | Discuss limitations at study and outcome level (e.g., risk of bias), and at review-level (e.g., incomplete retrieval of identified research, reporting bias).                        | 19             |
| Conclusions         | 26 | Provide a general interpretation of the results in the context of other evidence, and implications for future research.                                                              | 19-21          |
| <b>FUNDING</b>      |    |                                                                                                                                                                                      |                |
| Funding             | 27 | Describe sources of funding for the systematic review and other support (e.g., supply of data); role of funders for the systematic review.                                           | 3              |

## Additional Information (Appendix 1: Search strategy CINAHL Complete (EBSCOhost))

| #   | Query                                                                                                                                                              | Limiters/Expanders            | Last run via                                                                                              | Results |
|-----|--------------------------------------------------------------------------------------------------------------------------------------------------------------------|-------------------------------|-----------------------------------------------------------------------------------------------------------|---------|
| S1  | (MH "Women+") OR "woman"                                                                                                                                           | Search modes - Boolean/Phrase | Interface - EBSCOhost Research Databases<br>Search Screen - Advanced Search<br>Database - CINAHL Complete | 48,423  |
| S2  | (MH "Expectant Mothers") OR (MH "Expectant Parents+") OR (MH "Expectant Fathers") OR (MH "Mothers+")                                                               | Search modes - Boolean/Phrase | Interface - EBSCOhost Research Databases<br>Search Screen - Advanced Search<br>Database - CINAHL Complete | 26,493  |
| S3  | (MH "Maternal Attitudes") OR "maternal"                                                                                                                            | Search modes - Boolean/Phrase | Interface - EBSCOhost Research Databases<br>Search Screen - Advanced Search<br>Database - CINAHL Complete | 61,963  |
| S4  | (MH "Fathers+") OR "father"                                                                                                                                        | Search modes - Boolean/Phrase | Interface - EBSCOhost Research Databases<br>Search Screen - Advanced Search<br>Database - CINAHL Complete | 8,739   |
| S5  | (MH "Communities+")                                                                                                                                                | Search modes - Boolean/Phrase | Interface - EBSCOhost Research Databases<br>Search Screen - Advanced Search<br>Database - CINAHL Complete | 34,885  |
| S6  | (MH "Public Policy+") OR (MH "Public Opinion") OR (MH "Public Relations+") OR "public"                                                                             | Search modes - Boolean/Phrase | Interface - EBSCOhost Research Databases<br>Search Screen - Advanced Search<br>Database - CINAHL Complete | 313,760 |
| S7  | S1 OR S2 OR S3 OR S4 OR S5 OR S6                                                                                                                                   | Search modes - Boolean/Phrase | Interface - EBSCOhost Research Databases<br>Search Screen - Advanced Search<br>Database - CINAHL Complete | 460,465 |
| S8  | (MH "Personnel, Health Facility+# OR #MH "Attitude of Health Personnel+# OR #MH "Medical Staff+# OR #MH "Staff Nurses+# OR #MH "Staff Development+# OR "staff"     | Search modes - Boolean/Phrase | Interface - EBSCOhost Research Databases<br>Search Screen - Advanced Search<br>Database - CINAHL Complete | 171,947 |
| S9  | (MH "Organizational Culture+") OR "organization"                                                                                                                   | Search modes - Boolean/Phrase | Interface - EBSCOhost Research Databases<br>Search Screen - Advanced Search<br>Database - CINAHL Complete | 59,785  |
| S10 | (MH "Personnel, Health Facility+# OR #MH "Hospital Units+") OR "facility"                                                                                          | Search modes - Boolean/Phrase | Interface - EBSCOhost Research Databases<br>Search Screen - Advanced Search<br>Database - CINAHL Complete | 134,476 |
| S11 | (MH "Midwife Attitudes") OR (MH "Nurse Midwives") OR (MH "Midwives") OR (MH "Midwifery Service") OR (MH "Education, Nurse Midwifery") OR "midwife"                 | Search modes - Boolean/Phrase | Interface - EBSCOhost Research Databases<br>Search Screen - Advanced Search<br>Database - CINAHL Complete | 15,040  |
| S12 | (MH "Physician Attitudes") OR "Physician"                                                                                                                          | Search modes - Boolean/Phrase | Interface - EBSCOhost Research Databases<br>Search Screen - Advanced Search<br>Database - CINAHL Complete | 83,592  |
| S13 | (MH "Health Systems Agencies")                                                                                                                                     | Search modes - Boolean/Phrase | Interface - EBSCOhost Research Databases<br>Search Screen - Advanced Search<br>Database - CINAHL Complete | 203     |
| S14 | (MH "Multidisciplinary Care Team+") OR "health care provider"                                                                                                      | Search modes - Boolean/Phrase | Interface - EBSCOhost Research Databases<br>Search Screen - Advanced Search<br>Database - CINAHL Complete | 34,717  |
| S15 | S8 OR S9 OR S10 OR S11 OR S12 OR S13 OR S14                                                                                                                        | Search modes - Boolean/Phrase | Interface - EBSCOhost Research Databases<br>Search Screen - Advanced Search<br>Database - CINAHL Complete | 414,412 |
| S16 | S7 OR S15                                                                                                                                                          | Search modes - Boolean/Phrase | Interface - EBSCOhost Research Databases<br>Search Screen - Advanced Search<br>Database - CINAHL Complete | 815,501 |
| S17 | (MH "Early Intervention+") OR (MH "Intervention Trials") OR (MH "Nursing Interventions") OR (MH "Experimental Studies+") OR "Intervention"                         | Search modes - Boolean/Phrase | Interface - EBSCOhost Research Databases<br>Search Screen - Advanced Search<br>Database - CINAHL Complete | 378,666 |
| S18 | (MH "Program Evaluation") OR (MH "Summative Evaluation Research") OR (MH "Formative Evaluation Research") OR (MH "Evaluation Research+") OR "programme evaluation" | Search modes - Boolean/Phrase | Interface - EBSCOhost Research Databases<br>Search Screen - Advanced Search<br>Database - CINAHL Complete | 72,501  |

|     |                                                                                                                                                                                              |                               |                                                                                                     |           |
|-----|----------------------------------------------------------------------------------------------------------------------------------------------------------------------------------------------|-------------------------------|-----------------------------------------------------------------------------------------------------|-----------|
| S19 | (MH "Quality Improvement+") OR (MH "Clinical Documentation Improvement") OR (MH "Evaluation and Quality Improvement Program") OR (MH "Change Management") OR "improvement"                   | Search modes - Boolean/Phrase | Interface - EBSCOhost Research Databases Search Screen - Advanced Search Database - CINAHL Complete | 121,753   |
| S20 | (MH "Organizational Change")                                                                                                                                                                 | Search modes - Boolean/Phrase | Interface - EBSCOhost Research Databases Search Screen - Advanced Search Database - CINAHL Complete | 9,832     |
| S21 | (MH "Patient Education+")                                                                                                                                                                    | Search modes - Boolean/Phrase | Interface - EBSCOhost Research Databases Search Screen - Advanced Search Database - CINAHL Complete | 64,052    |
| S22 | (MH "Decision Support Techniques+") OR (MH "Decision Support Systems, Clinical") OR (MH "Decision Support Systems, Management") OR (MH "Decision Making, Organizational") OR "decision aids" | Search modes - Boolean/Phrase | Interface - EBSCOhost Research Databases Search Screen - Advanced Search Database - CINAHL Complete | 12,332    |
| S23 | (MH "Education, Nursing, Continuing") OR (MH "Education, Medical, Continuing") OR (MH "Education, Continuing+") OR "continuing professional education"                                       | Search modes - Boolean/Phrase | Interface - EBSCOhost Research Databases Search Screen - Advanced Search Database - CINAHL Complete | 27,501    |
| S24 | (MH "Clinical Competence+") OR (MH "Practice Patterns") OR (MH "Clinical Exemplars") OR (MH "Teaching Materials, Clinical") OR (MH "Clinical Assessment Tools+") OR "clinical audit"         | Search modes - Boolean/Phrase | Interface - EBSCOhost Research Databases Search Screen - Advanced Search Database - CINAHL Complete | 210,091   |
| S25 | (MH "Practice Guidelines") OR (MH "Guideline Adherence") OR (MH "Public Policy") OR (MH "Policy Making") OR "guidelines"                                                                     | Search modes - Boolean/Phrase | Interface - EBSCOhost Research Databases Search Screen - Advanced Search Database - CINAHL Complete | 138,839   |
| S26 | (MH "Harm Reduction") OR "reduce"                                                                                                                                                            | Search modes - Boolean/Phrase | Interface - EBSCOhost Research Databases Search Screen - Advanced Search Database - CINAHL Complete | 94,257    |
| S27 | (MH "Public Opinion") OR (MH "Referral and Consultation+") OR "routine second opinion"                                                                                                       | Search modes - Boolean/Phrase | Interface - EBSCOhost Research Databases Search Screen - Advanced Search Database - CINAHL Complete | 33,876    |
| S28 | barriers or obstacles or challenges                                                                                                                                                          | Search modes - Boolean/Phrase | Interface - EBSCOhost Research Databases Search Screen - Advanced Search Database - CINAHL Complete | 150,472   |
| S29 | facilitators or motivators                                                                                                                                                                   | Search modes - Boolean/Phrase | Interface - EBSCOhost Research Databases Search Screen - Advanced Search Database - CINAHL Complete | 7,344     |
| S30 | S17 OR S18 OR S19 OR S20 OR S21 OR S22 OR S23 OR S24 OR S25 OR S26 OR S27 OR S28 OR S29                                                                                                      | Search modes - Boolean/Phrase | Interface - EBSCOhost Research Databases Search Screen - Advanced Search Database - CINAHL Complete | 1,069,163 |
| S31 | Cesarean                                                                                                                                                                                     | Search modes - Boolean/Phrase | Interface - EBSCOhost Research Databases Search Screen - Advanced Search Database - CINAHL Complete | 16,553    |
| S32 | (MH "Cesarean Section+# OR #MH "Cesarean Section, Repeat"# OR #MH "Vaginal Birth After Cesarean"# OR #MH "Cesarean Section, Elective"# OR "cesarean"                                         | Search modes - Boolean/Phrase | Interface - EBSCOhost Research Databases Search Screen - Advanced Search Database - CINAHL Complete | 16,532    |
| S33 | (MH "Childbirth+") OR "childbirth" OR (MH "Childbirth Educators") OR (MH "Childbirth Education") OR (MH "Home Childbirth")                                                                   | Search modes - Boolean/Phrase | Interface - EBSCOhost Research Databases Search Screen - Advanced Search Database - CINAHL Complete | 26,326    |
| S34 | S31 OR S32 OR S33                                                                                                                                                                            | Search modes - Boolean/Phrase | Interface - EBSCOhost Research Databases Search Screen - Advanced Search Database - CINAHL Complete | 39,207    |
| S35 | qualitative research                                                                                                                                                                         | Search modes - Boolean/Phrase | Interface - EBSCOhost Research Databases Search Screen - Advanced Search Database - CINAHL Complete | 10,083    |

|     |                                                                                                                                        |                                                                               |                                                                                                     |           |
|-----|----------------------------------------------------------------------------------------------------------------------------------------|-------------------------------------------------------------------------------|-----------------------------------------------------------------------------------------------------|-----------|
| S36 | (MH "Structured Interview") OR (MH "Interviews+") OR "interviews" OR (MH "Unstructured Interview") OR (MH "Semi-Structured Interview") | Search modes - Boolean/Phrase                                                 | Interface - EBSCOhost Research Databases Search Screen - Advanced Search Database - CINAHL Complete | 184,622   |
| S37 | (MH "Attitude") OR (MH "Behavior+") OR (MH "Attitude of Health Personnel") OR (MH "Family Attitudes") OR (MH "Social Values+")         | Search modes - Boolean/Phrase                                                 | Interface - EBSCOhost Research Databases Search Screen - Advanced Search Database - CINAHL Complete | 701,738   |
| S38 | qualitative or case study or interview or observation or focus group or ethnograph or case study                                       | Search modes - Boolean/Phrase                                                 | Interface - EBSCOhost Research Databases Search Screen - Advanced Search Database - CINAHL Complete | 400,983   |
| S39 | (MH "Qualitative Studies+") OR "qualitative"                                                                                           | Search modes - Boolean/Phrase                                                 | Interface - EBSCOhost Research Databases Search Screen - Advanced Search Database - CINAHL Complete | 126,780   |
| S40 | view* OR want* OR cho* OR prefer* OR feel* OR thought* OR like OR accept* OR dislike OR wish OR hope or fear                           | Search modes - Boolean/Phrase                                                 | Interface - EBSCOhost Research Databases Search Screen - Advanced Search Database - CINAHL Complete | 450,000   |
| S41 | S35 OR S36 OR S37 OR S38 OR S39 OR S40                                                                                                 | Search modes - Boolean/Phrase                                                 | Interface - EBSCOhost Research Databases Search Screen - Advanced Search Database - CINAHL Complete | 1,261,828 |
| S42 | S34 AND S41                                                                                                                            | Search modes - Boolean/Phrase                                                 | Interface - EBSCOhost Research Databases Search Screen - Advanced Search Database - CINAHL Complete | 11,721    |
| S43 | S16 AND S30 AND S42                                                                                                                    | Limiters - Published Date: 19850101-20171231<br>Search modes - Boolean/Phrase | Interface - EBSCOhost Research Databases Search Screen - Advanced Search Database - CINAHL Complete | 2,225     |
| S89 | S17 OR S21                                                                                                                             | Search modes - Boolean/Phrase                                                 | Interface - EBSCOhost Research Databases Search Screen - Advanced Search Database - CINAHL Complete | 433,186   |
| S90 | S7 AND S34 AND S41 AND S89                                                                                                             | Search modes - Boolean/Phrase                                                 | Interface - EBSCOhost Research Databases Search Screen - Advanced Search Database - CINAHL Complete | 873       |
| S91 | S7 AND S31 AND S41 AND S89                                                                                                             | Search modes - Boolean/Phrase                                                 | Interface - EBSCOhost Research Databases Search Screen - Advanced Search Database - CINAHL Complete | 314       |

## Supplementary appendix Table: CERQual Summary of evidence profile

| Review finding                                                                                                                                                                                                                                                                                                                                                                                                                                                                                                                                                                                                                                                                                                                                                                                                                                                                                                                                                                                                                                                                      | Studies contributing to review finding | Methodological Limitations                                                                                                                        | Coherence                                                                                                                                                                                              | Adequacy                                                                                                                                                                | Relevance                                                                                                                                      | CERQual Assessment  | Explanation of confidence in the evidence assessment                                                                                                                                                                                                                     |
|-------------------------------------------------------------------------------------------------------------------------------------------------------------------------------------------------------------------------------------------------------------------------------------------------------------------------------------------------------------------------------------------------------------------------------------------------------------------------------------------------------------------------------------------------------------------------------------------------------------------------------------------------------------------------------------------------------------------------------------------------------------------------------------------------------------------------------------------------------------------------------------------------------------------------------------------------------------------------------------------------------------------------------------------------------------------------------------|----------------------------------------|---------------------------------------------------------------------------------------------------------------------------------------------------|--------------------------------------------------------------------------------------------------------------------------------------------------------------------------------------------------------|-------------------------------------------------------------------------------------------------------------------------------------------------------------------------|------------------------------------------------------------------------------------------------------------------------------------------------|---------------------|--------------------------------------------------------------------------------------------------------------------------------------------------------------------------------------------------------------------------------------------------------------------------|
| <b>Beliefs about birth:</b> Across HIC and MICs health professionals reported varying beliefs about birth. These included a common approach to birth shared by obstetricians and midwives who valued the physiological process and worked effectively as a team to make it happen (recognising it as an empowering process for women and only intervening when medically necessary), to labour and vaginal birth as a fatally flawed physiological process with CS the preferable means to an end. This dichotomy of beliefs reflected competing ideologies of birth and shaped the importance individuals attached to CS rate reduction. In MIC, while some obstetricians who preferred CS made reference to perinatal mortality and morbidity gains, this was not the experience of the few female, Chinese obstetricians who actually had CDMR, nor the preference of Iranian obstetricians who expressed concerns about having to deal with co-morbidities caused by previous CSs. Beliefs were influenced by professional training, personal experience, and practice setting. | 1,3,5-12,14-16                         | Minor concerns regarding methodological limitations in 8 studies and moderate to significant concerns in 5 of 13 studies predominantly from MICs. | Minor concerns about coherence, with higher confidence in HIC and MIC, with no data reported to support this review finding in LICs.                                                                   | Minor concerns regarding adequacy with rich data from Iran, China, Nicaragua, USA, Canada, Finland, Sweden, The Netherlands, Germany, Italy, Ireland, Australia and UK. | Moderate concerns regarding relevance with 7 studies from HIC, 6 MIC, and none from LIC contributing to this review finding.                   | Moderate confidence | 13 studies with minor to significant methodological limitations. Rich data from 14 countries across 4 geographical regions, high- and middle- income levels, and high and low CS rates. Reasonable level of coherence with uncertain confidence in low-income countries. |
| <b>Beliefs about what constitutes necessary and unnecessary CS:</b> Some health professionals reported CS rates as determined by factors beyond their control (i.e. uncertain obstetric history, unfolding obstetric circumstance and clinical indications), but between health professionals there was no clear consensus as to what they believed to be clinical indications across time (i.e. breech), place (i.e. availability and access) and parity (i.e. women with a previous CS). Some senior doctors and midwives expressed concerns that less experienced staff are more likely to perform CS based on vague indications and spoke favourably about wanting junior staff to consult them more for a second opinion. Other senior staff suggested second opinion policies only work where both doctors are in attendance at the hospital. While some residents also reported wanting improved communication, they feared seeking a second opinion would negatively impact their clinical credibility and career.                                                          | 1-2, 4-5,13,17                         | Minor concerns regarding methodological limitations in 4 studies and moderate concerns in 2 of 6 studies from across resource settings.           | Major concerns about coherence with contradictions in available data. It is unclear as to what extent this is because the nature and extent of life-threatening clinical indications actually differs. | Major concerns regarding adequacy with limited, thin data from different resource settings.                                                                             | Minor concerns regarding relevance with 3 studies from HIC, 1 MIC and 2 LICs.                                                                  | Low confidence      | 6 studies with minor to moderate methodological limitations. Thin data, with major concerns about coherence across settings.                                                                                                                                             |
| <b>Beliefs about the evidence-base surrounding caesarean section:</b> Health professionals' views about research evidence varied. Most health professionals recognised that guidelines represent the national or international evidence-base, which sensitised them to reflect on their practice, providing a potential mechanism for change. Most health professionals wanted more evidence of transferability to their own practice context, particularly in MIC and LIC contexts, where audit was not common. Not all health professionals believed available evidence to be valid, applicable to their practice, or feasible to implement, and spoke about keeping-up-to-date with the latest evidence as challenging. Across resource settings obstetricians and midwives expressed concerns about evidence of risks associated with CS as incomplete. Some health professionals who valued guidelines were also                                                                                                                                                               | 1-2, 4-5, 9-11, 14-15, 17              | Minor concerns regarding methodological limitations in 6 studies and moderate concerns in 4 studies.                                              | Minor concerns about coherence with clear patterns identified across studies. Less confidence in LICs.                                                                                                 | Moderate concerns regarding adequacy with thick data from HICs and MICs, but very thin, limited data from LICs.                                                         | Moderate concerns regarding relevance with 6 studies from HIC, 3 from MIC, and only one 1 study from LICs contributing to this review finding. | Moderate confidence | 10 studies with minor to moderate methodological limitations. Rich data from across 3 geographical regions but limited data from LICs. High coherence across HICs and MICs. Uncertain confidence in LICs.                                                                |



|                                                                                                                                                                                                                                                                                                                                                                                                                                                                                                                                                                                                                                                                                                                                                                                                                                                                                                                                                                                                                                                                                                                                                                                                                                                                                                                      |                           |                                                                                                                   |                                                                                                                                                                                                                                      |                                                                                                                                    |                                                                                                                                     |                            |                                                                                                                                                                                                |
|----------------------------------------------------------------------------------------------------------------------------------------------------------------------------------------------------------------------------------------------------------------------------------------------------------------------------------------------------------------------------------------------------------------------------------------------------------------------------------------------------------------------------------------------------------------------------------------------------------------------------------------------------------------------------------------------------------------------------------------------------------------------------------------------------------------------------------------------------------------------------------------------------------------------------------------------------------------------------------------------------------------------------------------------------------------------------------------------------------------------------------------------------------------------------------------------------------------------------------------------------------------------------------------------------------------------|---------------------------|-------------------------------------------------------------------------------------------------------------------|--------------------------------------------------------------------------------------------------------------------------------------------------------------------------------------------------------------------------------------|------------------------------------------------------------------------------------------------------------------------------------|-------------------------------------------------------------------------------------------------------------------------------------|----------------------------|------------------------------------------------------------------------------------------------------------------------------------------------------------------------------------------------|
| <p>very clear they took other factors into account in actual decision-making (i.e. interpersonal relationships, patient’s unique characteristics).</p>                                                                                                                                                                                                                                                                                                                                                                                                                                                                                                                                                                                                                                                                                                                                                                                                                                                                                                                                                                                                                                                                                                                                                               |                           |                                                                                                                   |                                                                                                                                                                                                                                      |                                                                                                                                    |                                                                                                                                     |                            |                                                                                                                                                                                                |
| <p><b>Fear of blame and recrimination (including medico-legal concerns):</b> Across HIC, MIC and LICs health professionals reported fear of litigation as an important influence on their low threshold for performing CS (although no-one had actual experience of litigation in LIC). Predominantly in North America health professionals described medico-legal concerns as an underlying factor in non-compliance to guideline recommendations. Across urban and rural settings with or without 24-hour obstetrical and anaesthesia coverage, obstetricians and midwives weighed up the balance of professional identity risk with not intervening, a poor outcome ensuing and a medico-legal case against them. Also in North America some obstetricians were opposed to second-opinion policies because of the difficulties in medico-legal responsibilities that could ensue. In North America, some European countries and Africa, midwives and obstetricians expressed concerns about threats to their professional identity and career prospects posed by internal audit and feedback. A few health professionals welcomed guidelines as providing a defensible basis for their practice, while other midwives and obstetricians were undeterred in their commitment to intervene only when necessary.</p> | <p>1-2, 5-7, 11,13,15</p> | <p>No concerns regarding methodological limitations in 6 studies and minor to moderate concerns in 2 studies.</p> | <p>Moderate concerns about coherence as fear of blame is a cogent finding across studies but the influence of actual experience of litigation on preference for CS is unclear in MICs and HICs, and no actual experience in LIC.</p> | <p>Moderate concerns regarding adequacy with fairly thick data from USA, UK, Iran, Nicaragua, and Tanzania.</p>                    | <p>Moderate concerns regarding relevance with 8 studies from HIC (4), MIC (3), and LIC (1) contributing to this review finding.</p> | <p>Moderate confidence</p> | <p>8 studies, with no to moderate methodological limitations. Rich data from 5 countries. Moderate coherence.</p>                                                                              |
| <p><b>Value attached to financial rewards associated with CS:</b> Some health professionals were outspoken about the economic incentives for CSs, particularly in private healthcare facilities. This included doctors in Tanzania, Iran, China and Nicaragua, as well as midwives in Iran and the USA. Some doctors considered CS to involve more work, which justified the payment; others blamed the system, while others still reported personally valuing this extra income. Some doctors, and midwives, were critical of insufficient monetary reward to staff labour and vaginal birth by comparison.</p>                                                                                                                                                                                                                                                                                                                                                                                                                                                                                                                                                                                                                                                                                                     | <p>2,5-7,10-11, 13,17</p> | <p>Minor concerns regarding methodological limitations in 5 studies and moderate concerns in 3 studies.</p>       | <p>No or very minor concerns regarding coherence. Data similar within and across countries, setting, and resource context.</p>                                                                                                       | <p>Moderate concerns regarding adequacy with adequate data from 5 countries and thick data from 2 countries, both MIC.</p>         | <p>Minor concerns regarding relevance with 8 studies from 3 HICs, 4 MICs and 1 LIC.</p>                                             | <p>Moderate confidence</p> | <p>8 studies with minor to moderate methodological limitations. Rich data predominantly from middle-income countries. High coherence.</p>                                                      |
| <p><b>Preferences for CS as convenient:</b> Health professionals valued both the scheduling CS offers and the lesser time commitment it entails compared with labour and vaginal birth. Some health professionals described how CS was convenience for women too (for the same reasons), although others recognised while CS might be more convenient for them, it is not what every woman wants.</p>                                                                                                                                                                                                                                                                                                                                                                                                                                                                                                                                                                                                                                                                                                                                                                                                                                                                                                                | <p>5-6, 8-11, 13</p>      | <p>Minor concerns regarding methodological limitations in 4 studies and moderate concerns in 3 studies.</p>       | <p>Minor concerns regarding coherence with data similar within and across countries, setting, and resource context.</p>                                                                                                              | <p>Moderate concerns regarding adequacy with adequate data from 5 studies and rich data from 2 studies.</p>                        | <p>Moderate concerns regarding relevance with 2 studies from HICs, 4 from MICs and 1 from a LIC.</p>                                | <p>Moderate confidence</p> | <p>7 studies with minor to moderate methodological limitations. Fairly rich data from 2 studies and convenience a theme in a third. High coherence.</p>                                        |
| <p><b>Beliefs about women:</b> Across the world, health professionals reported women’s demand for a particular birth method as an important factor influencing rates of CS, NVD and VBAC. Some health professionals believed women now value CS as a consumer choice (available in public and private healthcare settings), others attributed increasing rates to women’s lower threshold for CS during labour. In HIC, MICs and one LIC (Tanzania), a few health professionals spoke about women’s innate ability to labour and birth as being diminished by rising BMIs, advanced maternal age, sedentary lifestyles and “western diseases”. Health professionals also perceived women as lacking in antenatal education, being influenced by their</p>                                                                                                                                                                                                                                                                                                                                                                                                                                                                                                                                                            | <p>1-2,4-11,13-17</p>     | <p>Minor concerns regarding methodological limitations in 9 studies and moderate concerns in 6 studies.</p>       | <p>Minor concerns regarding coherence with data similar within and across countries, setting, and resource context.</p>                                                                                                              | <p>Minor concerns regarding adequacy with thick data, from studies across 5 world regions, HIC, MIC and LIC resource settings.</p> | <p>Minor concerns regarding relevance with studies of health professionals from HICs, MICs and LICs, with a range of CS rates.</p>  | <p>High confidence</p>     | <p>15 studies with no to moderate methodological limitations. Thick data from 15 countries, across 5 world regions, high-, middle- and low-income settings with high CSRs. High coherence.</p> |

|                                                                                                                                                                                                                                                                                                                                                                                                                                                                                                                                                                                                                                                                                                                                                                                                                                                                                                                                                                                         |                     |                                                                                                                                 |                                                                                                              |                                                                                                                                                                 |                                                                                                                                           |                     |                                                                                                                                                                                                                 |
|-----------------------------------------------------------------------------------------------------------------------------------------------------------------------------------------------------------------------------------------------------------------------------------------------------------------------------------------------------------------------------------------------------------------------------------------------------------------------------------------------------------------------------------------------------------------------------------------------------------------------------------------------------------------------------------------------------------------------------------------------------------------------------------------------------------------------------------------------------------------------------------------------------------------------------------------------------------------------------------------|---------------------|---------------------------------------------------------------------------------------------------------------------------------|--------------------------------------------------------------------------------------------------------------|-----------------------------------------------------------------------------------------------------------------------------------------------------------------|-------------------------------------------------------------------------------------------------------------------------------------------|---------------------|-----------------------------------------------------------------------------------------------------------------------------------------------------------------------------------------------------------------|
| families, and the plethora of information about birth available in the media and on-line.                                                                                                                                                                                                                                                                                                                                                                                                                                                                                                                                                                                                                                                                                                                                                                                                                                                                                               |                     |                                                                                                                                 |                                                                                                              |                                                                                                                                                                 |                                                                                                                                           |                     |                                                                                                                                                                                                                 |
| <b>Beliefs about need for high-level infrastructures:</b> Health professionals in HICs who were supportive of VBAC were flexible in their interpretation of guidelines and used them and available technologies in a facilitative way. Other health professionals, predominantly from MICs and LICs, but some from HICs, expressed concerns that a lack of human and technological resource made guideline recommendations unworkable in practice. In HICs where 24-hour obstetrical and anaesthesia cover was available, some health professionals reported women were still refused a trial of labour.                                                                                                                                                                                                                                                                                                                                                                                | 1-2,4-6,9-17        | No or minor concerns regarding methodological limitations in 10 studies and moderate concerns in 4 of 14 studies.               | Moderate concerns regarding coherence. Variations in the data apparent within and between resource settings. | Moderate concerns regarding adequacy. Data from 5 world regions, including 17 countries, with thick data from 10 studies in HICs and MICs. Thin data from LICs. | Minor concerns regarding relevance. (No studies from China contributed to the finding but population policy 1979-2016 means not relevant) | Moderate confidence | 14 studies with no to moderate methodological limitations. Thick data from HICs and MICs. The finding may have higher confidence in settings where the level of resource is sufficient to sustain necessary CS. |
| <b>Beliefs about the clinical encounter and autonomous decision-making:</b> Obstetricians and midwives views varied as to who they thought should have the final say in the decision to perform a CS. Some health professionals accepted a woman's right to choose CS, many thought the decision should be shared, while others believed the decision could only be made by health professionals qualified to do so. Some health professionals expressed concern time constraints in practice limited their opportunities to facilitate informed decision-making. Where teams had a shared approach they reported informed decision-making did happen and irrespective of who made the final decision everyone involved was reassured by the process.                                                                                                                                                                                                                                   | 1-3,5-9,11-14,16-17 | No or minor concerns regarding methodological limitations in 9 studies and moderate to significant concerns in 5 of 14 studies. | Minor concerns regarding coherence.                                                                          | Moderate concerns regarding adequacy. Thick data from 5 world regions, across 8 HICs, 5 MICs and one LIC.                                                       | Moderate concerns regarding relevance with only one study from a LIC (Tanzania).                                                          | Moderate confidence | 14 studies with no to significant methodological limitations. Thick data from HICs, MICs and one LIC. High coherence.                                                                                           |
| <b>Organisation of care:</b> Across the world, health professionals perceived the maternity care system as insufficiently resourced (human and material). Midwives and Obstetricians reported where CS was an important source of revenue operating facilities were a priority, and facilities for labouring women were poor and inadequately staffed.                                                                                                                                                                                                                                                                                                                                                                                                                                                                                                                                                                                                                                  | 2,4-6,9,11-13,15,17 | No or minor concerns regarding methodological limitations in 7 studies and moderate concerns in 3 of 10 studies.                | Minor concerns regarding coherence.                                                                          | Moderate concerns regarding adequacy. Thin data from 4 world regions, across predominantly HICs.                                                                | Moderate concerns regarding relevance.                                                                                                    | Moderate confidence | 10 studies with no to moderate methodological limitations. Thin data from 13 countries, and thick data from Iran. High coherence.                                                                               |
| <b>Belief in need to reduce unnecessary CS and receptiveness to change:</b> Across resource settings health professionals reported concerns about high CS rates and associated morbidity. In Iran and Tanzania some health professionals spoke about colleagues who performed CS for non-medical reasons as contravening medicines underlying ethical principle to do no harm. In European settings, health professionals experienced interventions targeted to reduce unnecessary CS as most acceptable where this vision was shared within and between multi-disciplinary groups. In the UK and Scandinavia, health professionals from organisations that achieved success in reducing rates had positive attitudes towards critical self-reflection (including audit, second opinion and continuing medical education) and felt supported by colleagues and opinion leaders. Across resource settings health professionals acknowledged concerted action to reduce unnecessary CS as | 1-2,5-6,9,11-14     | No or minor concerns regarding methodological limitations in 7 studies and moderate concerns in 2 of 9 studies.                 | Minor concerns regarding coherence with similar data across studies.                                         | Moderate concerns regarding adequacy. Thick data from 3 world regions, and thin data from African region (1 study).                                             | Moderate concerns regarding relevance with no included studies from China.                                                                | Moderate confidence | 9 studies with no to moderate methodological limitations. Thick data from Europe. Only one study from African region contributed to this finding. High coherence.                                               |

1  
2  
3  
4  
5  
6  
7  
8  
9  
10  
11  
12  
13  
14  
15  
16  
17  
18  
19  
20  
21  
22  
23  
24  
25  
26  
27  
28  
29  
30  
31  
32  
33  
34  
35  
36  
37  
38  
39  
40  
41  
42  
43  
44  
45  
46

|                                                                                                                                                                                                                                                                                                                                                                                                                                                                                                                                                                                                                                                                                                                                                                                                                                                                                                                                                                   |                    |                                                                                                                                             |                                                                                                                           |                                                                                                                                                   |                                                                                |                     |                                                                                                                         |
|-------------------------------------------------------------------------------------------------------------------------------------------------------------------------------------------------------------------------------------------------------------------------------------------------------------------------------------------------------------------------------------------------------------------------------------------------------------------------------------------------------------------------------------------------------------------------------------------------------------------------------------------------------------------------------------------------------------------------------------------------------------------------------------------------------------------------------------------------------------------------------------------------------------------------------------------------------------------|--------------------|---------------------------------------------------------------------------------------------------------------------------------------------|---------------------------------------------------------------------------------------------------------------------------|---------------------------------------------------------------------------------------------------------------------------------------------------|--------------------------------------------------------------------------------|---------------------|-------------------------------------------------------------------------------------------------------------------------|
| challenging, but achievable and intrinsically rewarding where there was respect, accountability, and shared responsibility to support women achieve a vaginal birth.                                                                                                                                                                                                                                                                                                                                                                                                                                                                                                                                                                                                                                                                                                                                                                                              |                    |                                                                                                                                             |                                                                                                                           |                                                                                                                                                   |                                                                                |                     |                                                                                                                         |
| <b>Views about the format, content and delivery of interventions:</b> A few health professionals spoke about the importance of the tone of guidance as facilitative of reflection, not dictatorial, judgemental or threatening, at the same time as being clear about the need for change by avoiding the use of words such as 'should', 'developmental' or 'pilot.' Some health professionals described how important it was for local opinion leaders to endorse projects, and where external facilitators were involved they are 'credible' and 'grounded', exercised cultural humility, and understand the challenges within specific practice settings. In some HICs, health professionals talked about multi-disciplinary /inter-professional team involvement meaning representatives from medicine (obstetrics, anaesthesia, paediatrics), nursing and midwifery, allied health professionals, quality, health records, and scheduling in secondary care. | 2,5,9,11-13        | No or minor concerns regarding methodological limitations in 4 studies and moderate to significant concerns in 2 studies of 6 total studies | Moderate concerns about coherence with similarities and contradictions in available data.                                 | Major concerns regarding adequacy with thick data from one UK study. Data from 4 regions and across resource settings is thin.                    | Minor concerns regarding relevance with 3 studies from HICs, 2 MICs and 1 LIC. | Low confidence      | 6 studies with minor to significant methodological limitations. Thick data from one study. Extent of coherence unclear. |
| <b>Reluctance to change based on lack of training, skills or experience:</b> Some health professionals spoke about how pre-and post-registration training has ill-equipped the next generation for a reduction in CS rates as they have little experience, competency or confidence in normal labour and vaginal birth. Others reported wanting specific training on recommendations to make them more acceptable in practice. Reasons for many health professionals lack of buy-in was multifactorial - see also Organisation of care; Beliefs about need for complex infrastructure; and Beliefs about the clinical encounter and autonomous decision-making.                                                                                                                                                                                                                                                                                                   | 2,4-5,7,9,11,15-17 | No or minor concerns regarding methodological limitations in 5 studies and moderate concerns in 4 studies of 9 total studies.               | Moderate concerns regarding coherence with similar, but thin data across studies, and overlap with other emergent themes. | Major concerns regarding adequacy with thick data from one Iranian study. Data from 5 regions and across resource settings is thin.               | Minor concerns regarding relevance with 5 studies from HICs, 3 MICs and 1 LIC. | Low confidence      | 9 studies with minor to significant methodological limitations. Thick data from one study. Extent of coherence unclear. |
| <b>Dysfunctional teamwork, within the medical profession and including the marginalization of midwives:</b> Health professionals reported dysfunctional teamwork within and between professionals as an important barrier to reducing unnecessary CS rates. Medicine's entrenched hierarchies, lack of communication between maternity and theatre staff, and difficult relationships between obstetricians, midwives and family doctors were all spoken about. Some midwives and obstetricians spoke passionately about the marginalization of midwives and their exclusion from birth as counterproductive.                                                                                                                                                                                                                                                                                                                                                     | 2,4-6,9-13, 15,17  | No or minor concerns regarding methodological limitations in 7 studies and moderate concerns in 4 studies of 11 total studies.              | Minor concerns regarding coherence with similar data across studies.                                                      | Moderate concerns regarding adequacy with thin data from 8 studies and rich data from 3 studies across resource settings (UK, Iran and Tanzania). | Minor concerns regarding relevance with 6 studies from HICs, 3 MICs and 2 LIC. | Moderate confidence | 11 studies with minor to moderate methodological limitations. Thick data from across resource settings. High coherence. |

## References

1. Kamal P, Dixon-Woods M, Kurinczuk JJ, Oppenheimer C, Squire P, Waugh J. Factors influencing repeat caesarean section: qualitative exploratory study of obstetricians' and midwives' accounts. *BJOG*, 2005, 112: 1054-1060.
2. Chaillet N, Dube E, Dugas M, Francoeur D, Dube J, Gagon S, Poitras, Dumont A. Identifying barriers and facilitators towards implementing guidelines to reduce caesarean section rates in Quebec. *Bulletin of the World Health Organization*. 2007 85;10:791-797.
3. Chen Y, Lu W, Zhang YF. Informed choice and autonomy of decision making on caesarean section in China. *Maternal and Child Health Care of China* 2008; 23: 89-92. (Chinese).
4. Wanyonyi SZ, Mukaindo AM, Stones W. Perspectives on the practice of vaginal birth after caesarean section in East Africa. *East African Medical Journal*. 2010, 87 (8): 335-339.
5. Yazdizadeh B, Nedjat S, Mohammad K, Rashidian A, Changizi N, Majdzadeh R. Cesarean section rate in Iran, multidimensional approaches for behavioral change of providers: a qualitative study. *BMC Health Services Research* 2011, 11:159.
6. Cox KJ. Providers' perspectives on the vaginal birth after cesarean guidelines in Florida, United States: a qualitative study. *BMC Pregnancy and Childbirth* 2011, 11:72.
7. Liu L, Tao FB, Huang K. Qualitative study on affecting factors of continuing increasing in caesarean section rate in rural area. *Modern Preventive Medicine* 2010 37(20):3865-9. (Chinese).
8. Wang N, Ding Y. Reasons for obstetric medial staff choosing cesarean section for themselves in the absence of medical indications: a qualitative study. *Journal of Nursing Science* 2013; 28(6): 39-41. (Chinese).
9. Dunn S, Sprague AE, Fell DB, Dy J, Harrold JA, Lamontagne B, Walker M. The Use of a Quality Indicator to Reduce Elective Repeat Caesarean Section for Low-Risk Women Before 39 Weeks' Gestation: The Eastern Ontario Experience. *J Obstet Gynaecol Can* 2013;35(4):306-316.
10. Lotfi R, Tehrani FR, Dovom MR, Torkestani F, Abedini M, Sajedinejad S. Development of strategies to reduce cesarean delivery rates in Iran 2012-2014: a mixed methods study. *Int J Prev Med* 2014, 5 (12):1552-1556.
11. Colomar M, Cafferata ML, Aleman A, Castellano G, Elorrio EG, Althabe F, Engelbrecht S. Mode of Childbirth in Low-Risk Pregnancies: Nicaraguan Physicians' Viewpoints. *Matern Child Health J*. 2014, 18:2382-2392.
12. Marshall JL, Spilby H, McCormick F. Evaluating the 'Focus on Normal Birth and Reducing Caesarean section Rates Rapid Improvement Programme': A mixed method study in England. *Midwifery*. 2015, 31: 332-340.
13. Litorp H, Mgaya A, Mbekenga CK, Kidanto HL, Johndotter S, Essen B. Fear, blame and transparency: obstetric caregivers' rationale for high caesarean section rates in low-resource setting. *Soc Sci Med*. 2015. 143:232-240.
14. Lungren I, Limbeek E, Vehvilainen-Julkunen, Nilsson C. Clinicians' views of factors of importance for improving the rate of VBAC (vaginal birth after caesarean section): a qualitative study from countries with high VBAC rates. *BMC Pregnancy and Childbirth*. 2015,15:196.
15. Lungren I, Healy P, Carroll M, Begley C, Matteme A, Gross MM, Grylka-Baesclin S, Nicoletti J, Morano S, Nilsson, Lalor J. Clinicians' views of factors of importance for improving the rate of VBAC (vaginal birth after caesarean section): a study from countries with low VBAC rates. *BMC Pregnancy and childbirth*. 2016, 16:350.
16. Foureur M, Turkmani S, Clack DS, Davis DL, Mollart L, Leiser B, Homer CSE. Caring for women wanting a vaginal birth after previous caesarean section: A qualitative study of the experiences of midwives and obstetricians. *Women and Birth* 2017, 30:3-8.
17. Melman S, Schreurs RHP, Dirksen CD, Kwee A, Nijhuis JG, Smeets NAC, Scheepers HCJ, Hermens RPMG. Identification of barriers and facilitators for optimal cesarean section care: perspective of professionals. *BMC Pregnancy and Childbirth*. 2017, 17:230.

### Supplementary appendix Table: Summary of studies used to test line of argument synthesis

| Authors, year                                                                                                                                           | Aim                                                                                                                                                                                                                                                                                                               | Country (Region)             | Resource | Setting         | Number of participants                                                                                 | Method                                      | Quality assessment |
|---------------------------------------------------------------------------------------------------------------------------------------------------------|-------------------------------------------------------------------------------------------------------------------------------------------------------------------------------------------------------------------------------------------------------------------------------------------------------------------|------------------------------|----------|-----------------|--------------------------------------------------------------------------------------------------------|---------------------------------------------|--------------------|
| <i>What health professionals say about the feasibility of interventions to reduce unnecessary interventions in childbirth and increase normal birth</i> |                                                                                                                                                                                                                                                                                                                   |                              |          |                 |                                                                                                        |                                             |                    |
| Binfa (2016)                                                                                                                                            | To explore professionals' perceptions (obstetricians and midwives), as well as consumers' perceptions of this humanised assistance during labour and childbirth                                                                                                                                                   | Chile (Americas)             | Middle   | Rural and urban | 40 Midwives and 29 obstetricians                                                                       | Focus groups                                | Not assessed       |
| Binfa (2013)                                                                                                                                            | To explore the perception of this humanised attention during labour and delivery by both the professional staff (obstetricians and midwives) and consumers                                                                                                                                                        | Chile (Americas)             | Middle   | Urban           | Unclear (6 focus groups and 2 in-depth interviews involving women, health professionals and Directors) | Focus groups and in-depth interviews        | Not assessed       |
| Janani (2015)                                                                                                                                           | To explore challenges in implementing the PBP from perspective of midwives and obstetricians that provide maternity care                                                                                                                                                                                          | Iran (Eastern Mediterranean) | Middle   | Urban           | 32 midwives and 6 obstetricians                                                                        | Focus groups and semi-structured interviews | Not assessed       |
| Kennedy (2016)                                                                                                                                          | To investigate facilitators and barriers to the achievement of primary vaginal birth in first-time mothers in hospital settings                                                                                                                                                                                   | USA (Americas)               | High     | Urban           | 18 Registered Nurses, 8 Midwives, 26 Obstetricians, 3 Paediatricians, 6 Anaesthetists                  | Individual or small group interviews        | Not assessed       |
| Darling (2016)                                                                                                                                          | To seek the views of midwives about the usefulness and relevance of the Keeping Birth Normal tool in measuring and supporting practice, and barriers to implementation                                                                                                                                            | UK (European)                | High     | Urban           | 9 Midwives                                                                                             | Semi-structured interviews                  | Not assessed       |
| Kerrigan (2015)                                                                                                                                         | To explore practitioners' experiences of and strategies for providing intrapartum care to obese women to inform the develop of an intervention to promote normal birth                                                                                                                                            | UK (European)                | High     | Urban           | 6 Consultant Obstetricians, 2 Consultant Anaesthetists, 16 midwives                                    | Focus groups and individual interviews      | Not assessed       |
| Cheyne (2013)                                                                                                                                           | To explore and explain the ways in which the Keeping childbirth Natural and Dynamic (KCND) programme worked or did not work in different maternity care contexts                                                                                                                                                  | UK (European)                | High     | Rural and urban | 73 Health Professionals                                                                                | Semi-structured interviews and focus groups | Not assessed       |
| Hunter (2014, 2010a,2010b)                                                                                                                              | To explore how the All Wales Clinical Pathway for normal labour was developed and used in real life settings and evaluate its implementation from the perspectives of all key players: midwives, doctors, mothers and midwifery managers                                                                          | UK (European)                | High     | Rural and urban | 41 midwives, 5 midwifery managers, 6 doctors                                                           | Observation, focus groups and interviews    | Not assessed       |
| Behruzi (2010)                                                                                                                                          | To explore the Japanese child birthing experience in different birth settings where the humanization of childbirth has been identified among the priority goals of the institutions concerned, and also to explore the obstacles and facilitators encountered in the practice of humanized birth in those centres | Japan (Western Pacific)      | High     | Urban           | 44 Health professionals                                                                                | Semi-structured interviews and focus groups | Not assessed       |
| Kennedy (2013, 2010)                                                                                                                                    | To identify factors that foster or hinder the support of normal birth and elective caesarean delivery                                                                                                                                                                                                             | UK (European)                | High     | Urban           | 34 clinicians (midwifery, obstetric, anaesthesia)                                                      | Interviews and observations                 | Not assessed       |

| <i>How health professionals perceive women's choice of delivery mode and the feasibility of reducing unnecessary CSs</i> |                                                                                                                                                     |                              |        |                 |                                                                 |                            |              |
|--------------------------------------------------------------------------------------------------------------------------|-----------------------------------------------------------------------------------------------------------------------------------------------------|------------------------------|--------|-----------------|-----------------------------------------------------------------|----------------------------|--------------|
| Huang (2013)                                                                                                             | To determine the population based CS rates in two counties in rural China and explore the factors associated with choice for CS as mode of delivery | China (Western Pacific)      | Middle | Rural           | n=58 Unclear how many Health Professionals - at least 2 doctors | Focus Groups               | Not assessed |
| Bagheri (2013)                                                                                                           | To explore obstetrician's views of what might influence pregnant women's choice of delivery method.                                                 | Iran (Eastern Mediterranean) | Middle | Urban           | 18 physicians                                                   | Semi-structured interviews | Not assessed |
| Weaver (2007)                                                                                                            | To examine whether, and in what context, maternal requests for caesarean section are made                                                           | UK (European)                | High   | Rural and urban | 29 Obstetricians (consultants and registrars)                   | Semi-structured Interviews | Not assessed |

#### References

1. Binfa L, Pantoja L, Ortiz J, Gurovich M, Cavada G. Assessment of the implementation of the model of integrated and humanised midwifery health services in Santiago. *Midwifery* 2013;29:1151-1157.
2. Binfa L, Pantoja L, Ortiz J, Gurovich M, Cavada G, Foster J. Assessment of the implementation of the model of integrated and humanised midwifery health services in Chile. *Midwifery*. 2016;35:53-61
3. Janani F, Kohan S, Taleghani F, Ghafarzadeh M. Challenges to implementing physiologic birth program (PBP): A qualitative study of midwives' opinions in Iran. *Acta Medica Mediterranea* 2015;31:1373
4. Kennedy HP, Doig E, Tillman S, Straus A, Williams B, Pettker C, Illuzzi J. Perspectives on Promoting Hospital Primary Vaginal Birth: A Qualitative Study. *BIRTH* 2016;43:336-345
5. Darling F. Practitioners' views and barriers to implementation of the keeping birth normal tool: A pilot study. *BJM* 2016. <https://doi.org/10.12968/bjom.2016.24.7.508>
6. Kerrigan A, Kingdon C, Cheyne H. Obesity and normal birth: A qualitative study of clinician's management of obese pregnant women during labour. *BMC Pregnancy and Childbirth* 2015;15:256.
7. Cheyne H, Abhyankar P, McCourt C. Empowering change: Realist evaluation of a Scottish Government programme to support normal birth. *Midwifery* 2013;29:1110-1121.
8. Hunter B. Implementing a National Policy Initiative to Support Normal Birth: Lessons from the All Wales Clinical Pathway for Normal Labour. *J Midwifery Womens Health* 2010;55:226-233.
9. Hunter B, Segrott J. Using a Clinical Pathway to Support Normal Birth: Impact on Practitioner Roles and Working Practices. *BIRTH* 2010;37:227-235
10. Hunter B, Segrott J. Renegotiating inter-professional boundaries in maternity care: implementing a clinical pathway for normal labour. *Sociology of Health & Illness* 2014;36:719-737.
11. Behuruza R, Hatem M, Fraser W, Goulet L, li M, Misago C. Facilitators and barriers in the humanization of birth in Japan. *BMC Pregnancy and Childbirth* 2010;10:25
12. Kennedy HP, Grant J, Walton C, Shaw-Battista J, Sandall J. Normalizing birth in England: A qualitative study. *Journal of Midwifery and Women's Health* 2010;55: 262-269.
13. Kennedy HP, Grant J, Sandall J. Elective caesarean delivery: A mixed-method qualitative investigation. *Midwifery* 2013;29:e138-e144
14. Huang K, Tao FB, Faragher B, Raven J, Tolhurst R, Tang S, van den Broek N. A mixed-method study of factors associated with differences in caesarean section rates at community level: The case of rural China. *Midwifery* 2013;29(8): 911-20.
15. Bagheri A, Masoudi Alavi N, Abbaszadeh F. Iranian obstetricians' views about the factors that influence pregnant women's choice of delivery method: A qualitative study. *Women and birth* 2013;26(1):e45-9.
16. Weaver JJ, Statham H, Richards M. Are there "unnecessary" caesarean sections? Perceptions of women and obstetricians about caesarean sections for non-clinical indications. *BIRTH* 2007;34:32-41.



1  
2  
3  
4  
5  
6  
7  
8  
9  
10  
11  
12  
13  
14  
15  
16  
17  
18  
19  
20  
21  
22  
23  
24  
25  
26  
27  
28  
29  
30  
31  
32  
33  
34  
35  
36  
37  
38  
39  
40  
41  
42  
43  
44  
45  
46  
47  
48  
49  
50  
51  
52  
53  
54  
55  
56  
57  
58  
59  
60

Thematic schema of effect

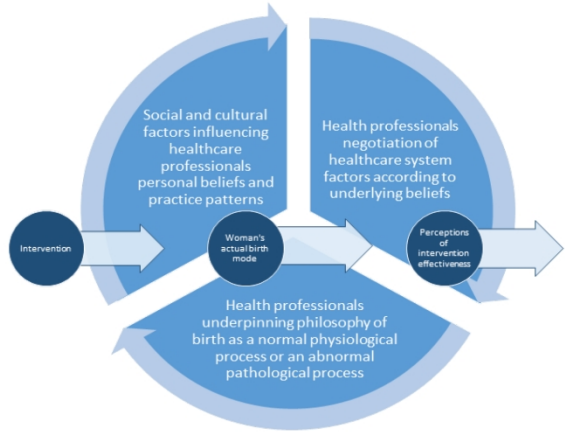

279x215mm (300 x 300 DPI)
