# Supplementary material for: Interventions targeted at health professionals to reduce unnecessary caesarean sections: a qualitative evidence synthesis
Source: PubMed Central journal article supplement — BMJ Open. 2018 Dec 16;8(12):e025073. doi: 10.1136/bmjopen-2018-025073 (PMC6303601; doi:10.1136/bmjopen-2018-025073), 2018-12-16
Supplement: bmjopen-2018-025073supp003.pdf [file bmjopen-2018-025073supp003.pdf]

## Additional Information (Appendix 1: Search strategy CINAHL Complete (EBSCOhost))

| #   | Query                                                                                                                                                              | Limiters/Expanders            | Last run via                                                                                              | Results |
|-----|--------------------------------------------------------------------------------------------------------------------------------------------------------------------|-------------------------------|-----------------------------------------------------------------------------------------------------------|---------|
| S1  | (MH "Women+") OR "woman"                                                                                                                                           | Search modes - Boolean/Phrase | Interface - EBSCOhost Research Databases<br>Search Screen - Advanced Search<br>Database - CINAHL Complete | 48,423  |
| S2  | (MH "Expectant Mothers") OR (MH "Expectant Parents+") OR (MH "Expectant Fathers") OR (MH "Mothers+")                                                               | Search modes - Boolean/Phrase | Interface - EBSCOhost Research Databases<br>Search Screen - Advanced Search<br>Database - CINAHL Complete | 26,493  |
| S3  | (MH "Maternal Attitudes") OR "maternal"                                                                                                                            | Search modes - Boolean/Phrase | Interface - EBSCOhost Research Databases<br>Search Screen - Advanced Search<br>Database - CINAHL Complete | 61,963  |
| S4  | (MH "Fathers+") OR "father"                                                                                                                                        | Search modes - Boolean/Phrase | Interface - EBSCOhost Research Databases<br>Search Screen - Advanced Search<br>Database - CINAHL Complete | 8,739   |
| S5  | (MH "Communities+")                                                                                                                                                | Search modes - Boolean/Phrase | Interface - EBSCOhost Research Databases<br>Search Screen - Advanced Search<br>Database - CINAHL Complete | 34,885  |
| S6  | (MH "Public Policy+") OR (MH "Public Opinion") OR (MH "Public Relations+") OR "public"                                                                             | Search modes - Boolean/Phrase | Interface - EBSCOhost Research Databases<br>Search Screen - Advanced Search<br>Database - CINAHL Complete | 313,760 |
| S7  | S1 OR S2 OR S3 OR S4 OR S5 OR S6                                                                                                                                   | Search modes - Boolean/Phrase | Interface - EBSCOhost Research Databases<br>Search Screen - Advanced Search<br>Database - CINAHL Complete | 460,465 |
| S8  | (MH "Personnel, Health Facility+# OR #MH "Attitude of Health Personnel+# OR #MH "Medical Staff+# OR #MH "Staff Nurses+# OR #MH "Staff Development+# OR "staff"     | Search modes - Boolean/Phrase | Interface - EBSCOhost Research Databases<br>Search Screen - Advanced Search<br>Database - CINAHL Complete | 171,947 |
| S9  | (MH "Organizational Culture+") OR "organization"                                                                                                                   | Search modes - Boolean/Phrase | Interface - EBSCOhost Research Databases<br>Search Screen - Advanced Search<br>Database - CINAHL Complete | 59,785  |
| S10 | (MH "Personnel, Health Facility+# OR #MH "Hospital Units+") OR "facility"                                                                                          | Search modes - Boolean/Phrase | Interface - EBSCOhost Research Databases<br>Search Screen - Advanced Search<br>Database - CINAHL Complete | 134,476 |
| S11 | (MH "Midwife Attitudes") OR (MH "Nurse Midwives") OR (MH "Midwives") OR (MH "Midwifery Service") OR (MH "Education, Nurse Midwifery") OR "midwife"                 | Search modes - Boolean/Phrase | Interface - EBSCOhost Research Databases<br>Search Screen - Advanced Search<br>Database - CINAHL Complete | 15,040  |
| S12 | (MH "Physician Attitudes") OR "Physician"                                                                                                                          | Search modes - Boolean/Phrase | Interface - EBSCOhost Research Databases<br>Search Screen - Advanced Search<br>Database - CINAHL Complete | 83,592  |
| S13 | (MH "Health Systems Agencies")                                                                                                                                     | Search modes - Boolean/Phrase | Interface - EBSCOhost Research Databases<br>Search Screen - Advanced Search<br>Database - CINAHL Complete | 203     |
| S14 | (MH "Multidisciplinary Care Team+") OR "health care provider"                                                                                                      | Search modes - Boolean/Phrase | Interface - EBSCOhost Research Databases<br>Search Screen - Advanced Search<br>Database - CINAHL Complete | 34,717  |
| S15 | S8 OR S9 OR S10 OR S11 OR S12 OR S13 OR S14                                                                                                                        | Search modes - Boolean/Phrase | Interface - EBSCOhost Research Databases<br>Search Screen - Advanced Search<br>Database - CINAHL Complete | 414,412 |
| S16 | S7 OR S15                                                                                                                                                          | Search modes - Boolean/Phrase | Interface - EBSCOhost Research Databases<br>Search Screen - Advanced Search<br>Database - CINAHL Complete | 815,501 |
| S17 | (MH "Early Intervention+") OR (MH "Intervention Trials") OR (MH "Nursing Interventions") OR (MH "Experimental Studies+") OR "Intervention"                         | Search modes - Boolean/Phrase | Interface - EBSCOhost Research Databases<br>Search Screen - Advanced Search<br>Database - CINAHL Complete | 378,666 |
| S18 | (MH "Program Evaluation") OR (MH "Summative Evaluation Research") OR (MH "Formative Evaluation Research") OR (MH "Evaluation Research+") OR "programme evaluation" | Search modes - Boolean/Phrase | Interface - EBSCOhost Research Databases<br>Search Screen - Advanced Search<br>Database - CINAHL Complete | 72,501  |

|     |                                                                                                                                                                                              |                               |                                                                                                     |           |
|-----|----------------------------------------------------------------------------------------------------------------------------------------------------------------------------------------------|-------------------------------|-----------------------------------------------------------------------------------------------------|-----------|
| S19 | (MH "Quality Improvement+") OR (MH "Clinical Documentation Improvement") OR (MH "Evaluation and Quality Improvement Program") OR (MH "Change Management") OR "improvement"                   | Search modes - Boolean/Phrase | Interface - EBSCOhost Research Databases Search Screen - Advanced Search Database - CINAHL Complete | 121,753   |
| S20 | (MH "Organizational Change")                                                                                                                                                                 | Search modes - Boolean/Phrase | Interface - EBSCOhost Research Databases Search Screen - Advanced Search Database - CINAHL Complete | 9,832     |
| S21 | (MH "Patient Education+")                                                                                                                                                                    | Search modes - Boolean/Phrase | Interface - EBSCOhost Research Databases Search Screen - Advanced Search Database - CINAHL Complete | 64,052    |
| S22 | (MH "Decision Support Techniques+") OR (MH "Decision Support Systems, Clinical") OR (MH "Decision Support Systems, Management") OR (MH "Decision Making, Organizational") OR "decision aids" | Search modes - Boolean/Phrase | Interface - EBSCOhost Research Databases Search Screen - Advanced Search Database - CINAHL Complete | 12,332    |
| S23 | (MH "Education, Nursing, Continuing") OR (MH "Education, Medical, Continuing") OR (MH "Education, Continuing+") OR "continuing professional education"                                       | Search modes - Boolean/Phrase | Interface - EBSCOhost Research Databases Search Screen - Advanced Search Database - CINAHL Complete | 27,501    |
| S24 | (MH "Clinical Competence+") OR (MH "Practice Patterns") OR (MH "Clinical Exemplars") OR (MH "Teaching Materials, Clinical") OR (MH "Clinical Assessment Tools+") OR "clinical audit"         | Search modes - Boolean/Phrase | Interface - EBSCOhost Research Databases Search Screen - Advanced Search Database - CINAHL Complete | 210,091   |
| S25 | (MH "Practice Guidelines") OR (MH "Guideline Adherence") OR (MH "Public Policy") OR (MH "Policy Making") OR "guidelines"                                                                     | Search modes - Boolean/Phrase | Interface - EBSCOhost Research Databases Search Screen - Advanced Search Database - CINAHL Complete | 138,839   |
| S26 | (MH "Harm Reduction") OR "reduce"                                                                                                                                                            | Search modes - Boolean/Phrase | Interface - EBSCOhost Research Databases Search Screen - Advanced Search Database - CINAHL Complete | 94,257    |
| S27 | (MH "Public Opinion") OR (MH "Referral and Consultation+") OR "routine second opinion"                                                                                                       | Search modes - Boolean/Phrase | Interface - EBSCOhost Research Databases Search Screen - Advanced Search Database - CINAHL Complete | 33,876    |
| S28 | barriers or obstacles or challenges                                                                                                                                                          | Search modes - Boolean/Phrase | Interface - EBSCOhost Research Databases Search Screen - Advanced Search Database - CINAHL Complete | 150,472   |
| S29 | facilitators or motivators                                                                                                                                                                   | Search modes - Boolean/Phrase | Interface - EBSCOhost Research Databases Search Screen - Advanced Search Database - CINAHL Complete | 7,344     |
| S30 | S17 OR S18 OR S19 OR S20 OR S21 OR S22 OR S23 OR S24 OR S25 OR S26 OR S27 OR S28 OR S29                                                                                                      | Search modes - Boolean/Phrase | Interface - EBSCOhost Research Databases Search Screen - Advanced Search Database - CINAHL Complete | 1,069,163 |
| S31 | Cesarean                                                                                                                                                                                     | Search modes - Boolean/Phrase | Interface - EBSCOhost Research Databases Search Screen - Advanced Search Database - CINAHL Complete | 16,553    |
| S32 | (MH "Cesarean Section+# OR #MH "Cesarean Section, Repeat"# OR #MH "Vaginal Birth After Cesarean"# OR #MH "Cesarean Section, Elective"# OR "cesarean"                                         | Search modes - Boolean/Phrase | Interface - EBSCOhost Research Databases Search Screen - Advanced Search Database - CINAHL Complete | 16,532    |
| S33 | (MH "Childbirth+") OR "childbirth" OR (MH "Childbirth Educators") OR (MH "Childbirth Education") OR (MH "Home Childbirth")                                                                   | Search modes - Boolean/Phrase | Interface - EBSCOhost Research Databases Search Screen - Advanced Search Database - CINAHL Complete | 26,326    |
| S34 | S31 OR S32 OR S33                                                                                                                                                                            | Search modes - Boolean/Phrase | Interface - EBSCOhost Research Databases Search Screen - Advanced Search Database - CINAHL Complete | 39,207    |
| S35 | qualitative research                                                                                                                                                                         | Search modes - Boolean/Phrase | Interface - EBSCOhost Research Databases Search Screen - Advanced Search Database - CINAHL Complete | 10,083    |

|     |                                                                                                                                        |                                                                               |                                                                                                     |           |
|-----|----------------------------------------------------------------------------------------------------------------------------------------|-------------------------------------------------------------------------------|-----------------------------------------------------------------------------------------------------|-----------|
| S36 | (MH "Structured Interview") OR (MH "Interviews+") OR "interviews" OR (MH "Unstructured Interview") OR (MH "Semi-Structured Interview") | Search modes - Boolean/Phrase                                                 | Interface - EBSCOhost Research Databases Search Screen - Advanced Search Database - CINAHL Complete | 184,622   |
| S37 | (MH "Attitude") OR (MH "Behavior+") OR (MH "Attitude of Health Personnel") OR (MH "Family Attitudes") OR (MH "Social Values+")         | Search modes - Boolean/Phrase                                                 | Interface - EBSCOhost Research Databases Search Screen - Advanced Search Database - CINAHL Complete | 701,738   |
| S38 | qualitative or case study or interview or observation or focus group or ethnograph or case study                                       | Search modes - Boolean/Phrase                                                 | Interface - EBSCOhost Research Databases Search Screen - Advanced Search Database - CINAHL Complete | 400,983   |
| S39 | (MH "Qualitative Studies+") OR "qualitative"                                                                                           | Search modes - Boolean/Phrase                                                 | Interface - EBSCOhost Research Databases Search Screen - Advanced Search Database - CINAHL Complete | 126,780   |
| S40 | view* OR want* OR cho* OR prefer* OR feel* OR thought* OR like OR accept* OR dislike OR wish OR hope or fear                           | Search modes - Boolean/Phrase                                                 | Interface - EBSCOhost Research Databases Search Screen - Advanced Search Database - CINAHL Complete | 450,000   |
| S41 | S35 OR S36 OR S37 OR S38 OR S39 OR S40                                                                                                 | Search modes - Boolean/Phrase                                                 | Interface - EBSCOhost Research Databases Search Screen - Advanced Search Database - CINAHL Complete | 1,261,828 |
| S42 | S34 AND S41                                                                                                                            | Search modes - Boolean/Phrase                                                 | Interface - EBSCOhost Research Databases Search Screen - Advanced Search Database - CINAHL Complete | 11,721    |
| S43 | S16 AND S30 AND S42                                                                                                                    | Limiters - Published Date: 19850101-20171231<br>Search modes - Boolean/Phrase | Interface - EBSCOhost Research Databases Search Screen - Advanced Search Database - CINAHL Complete | 2,225     |
| S89 | S17 OR S21                                                                                                                             | Search modes - Boolean/Phrase                                                 | Interface - EBSCOhost Research Databases Search Screen - Advanced Search Database - CINAHL Complete | 433,186   |
| S90 | S7 AND S34 AND S41 AND S89                                                                                                             | Search modes - Boolean/Phrase                                                 | Interface - EBSCOhost Research Databases Search Screen - Advanced Search Database - CINAHL Complete | 873       |
| S91 | S7 AND S31 AND S41 AND S89                                                                                                             | Search modes - Boolean/Phrase                                                 | Interface - EBSCOhost Research Databases Search Screen - Advanced Search Database - CINAHL Complete | 314       |
