# Supplementary material for: Interventions targeted at health professionals to reduce unnecessary caesarean sections: a qualitative evidence synthesis
Source: PubMed Central journal article supplement — BMJ Open. 2018 Dec 16;8(12):e025073. doi: 10.1136/bmjopen-2018-025073 (PMC6303601; doi:10.1136/bmjopen-2018-025073), 2018-12-16
Supplement: bmjopen-2018-025073supp005.pdf [file bmjopen-2018-025073supp005.pdf]

## Supplementary appendix Table: Summary of studies used to test line of argument synthesis

| Authors, year                                                                                                                                           | Aim                                                                                                                                                                                                                                                                                                               | Country (Region)             | Resource | Setting         | Number of participants                                                                                 | Method                                      | Quality assessment |
|---------------------------------------------------------------------------------------------------------------------------------------------------------|-------------------------------------------------------------------------------------------------------------------------------------------------------------------------------------------------------------------------------------------------------------------------------------------------------------------|------------------------------|----------|-----------------|--------------------------------------------------------------------------------------------------------|---------------------------------------------|--------------------|
| <i>What health professionals say about the feasibility of interventions to reduce unnecessary interventions in childbirth and increase normal birth</i> |                                                                                                                                                                                                                                                                                                                   |                              |          |                 |                                                                                                        |                                             |                    |
| Binfa (2016)                                                                                                                                            | To explore professionals' perceptions (obstetricians and midwives), as well as consumers' perceptions of this humanised assistance during labour and childbirth                                                                                                                                                   | Chile (Americas)             | Middle   | Rural and urban | 40 Midwives and 29 obstetricians                                                                       | Focus groups                                | Not assessed       |
| Binfa (2013)                                                                                                                                            | To explore the perception of this humanised attention during labour and delivery by both the professional staff (obstetricians and midwives) and consumers                                                                                                                                                        | Chile (Americas)             | Middle   | Urban           | Unclear (6 focus groups and 2 in-depth interviews involving women, health professionals and Directors) | Focus groups and in-depth interviews        | Not assessed       |
| Janani (2015)                                                                                                                                           | To explore challenges in implementing the PBP from perspective of midwives and obstetricians that provide maternity care                                                                                                                                                                                          | Iran (Eastern Mediterranean) | Middle   | Urban           | 32 midwives and 6 obstetricians                                                                        | Focus groups and semi-structured interviews | Not assessed       |
| Kennedy (2016)                                                                                                                                          | To investigate facilitators and barriers to the achievement of primary vaginal birth in first-time mothers in hospital settings                                                                                                                                                                                   | USA (Americas)               | High     | Urban           | 18 Registered Nurses, 8 Midwives, 26 Obstetricians, 3 Paediatricians, 6 Anaesthetists                  | Individual or small group interviews        | Not assessed       |
| Darling (2016)                                                                                                                                          | To seek the views of midwives about the usefulness and relevance of the Keeping Birth Normal tool in measuring and supporting practice, and barriers to implementation                                                                                                                                            | UK (European)                | High     | Urban           | 9 Midwives                                                                                             | Semi-structured interviews                  | Not assessed       |
| Kerrigan (2015)                                                                                                                                         | To explore practitioners' experiences of and strategies for providing intrapartum care to obese women to inform the develop of an intervention to promote normal birth                                                                                                                                            | UK (European)                | High     | Urban           | 6 Consultant Obstetricians, 2 Consultant Anaesthetists, 16 midwives                                    | Focus groups and individual interviews      | Not assessed       |
| Cheyne (2013)                                                                                                                                           | To explore and explain the ways in which the Keeping childbirth Natural and Dynamic (KCND) programme worked or did not work in different maternity care contexts                                                                                                                                                  | UK (European)                | High     | Rural and urban | 73 Health Professionals                                                                                | Semi-structured interviews and focus groups | Not assessed       |
| Hunter (2014, 2010a,2010b)                                                                                                                              | To explore how the All Wales Clinical Pathway for normal labour was developed and used in real life settings and evaluate its implementation from the perspectives of all key players: midwives, doctors, mothers and midwifery managers                                                                          | UK (European)                | High     | Rural and urban | 41 midwives, 5 midwifery managers, 6 doctors                                                           | Observation, focus groups and interviews    | Not assessed       |
| Behruzi (2010)                                                                                                                                          | To explore the Japanese child birthing experience in different birth settings where the humanization of childbirth has been identified among the priority goals of the institutions concerned, and also to explore the obstacles and facilitators encountered in the practice of humanized birth in those centres | Japan (Western Pacific)      | High     | Urban           | 44 Health professionals                                                                                | Semi-structured interviews and focus groups | Not assessed       |
| Kennedy (2013, 2010)                                                                                                                                    | To identify factors that foster or hinder the support of normal birth and elective caesarean delivery                                                                                                                                                                                                             | UK (European)                | High     | Urban           | 34 clinicians (midwifery, obstetric, anaesthesia)                                                      | Interviews and observations                 | Not assessed       |

| <i>How health professionals perceive women's choice of delivery mode and the feasibility of reducing unnecessary CSs</i> |                                                                                                                                                     |                              |        |                 |                                                                 |                            |              |
|--------------------------------------------------------------------------------------------------------------------------|-----------------------------------------------------------------------------------------------------------------------------------------------------|------------------------------|--------|-----------------|-----------------------------------------------------------------|----------------------------|--------------|
| Huang (2013)                                                                                                             | To determine the population based CS rates in two counties in rural China and explore the factors associated with choice for CS as mode of delivery | China (Western Pacific)      | Middle | Rural           | n=58 Unclear how many Health Professionals - at least 2 doctors | Focus Groups               | Not assessed |
| Bagheri (2013)                                                                                                           | To explore obstetrician's views of what might influence pregnant women's choice of delivery method.                                                 | Iran (Eastern Mediterranean) | Middle | Urban           | 18 physicians                                                   | Semi-structured interviews | Not assessed |
| Weaver (2007)                                                                                                            | To examine whether, and in what context, maternal requests for caesarean section are made                                                           | UK (European)                | High   | Rural and urban | 29 Obstetricians (consultants and registrars)                   | Semi-structured Interviews | Not assessed |

#### References

1. Binfa L, Pantoja L, Ortiz J, Gurovich M, Cavada G. Assessment of the implementation of the model of integrated and humanised midwifery health services in Santiago. *Midwifery* 2013;29:1151-1157.
2. Binfa L, Pantoja L, Ortiz J, Gurovich M, Cavada G, Foster J. Assessment of the implementation of the model of integrated and humanised midwifery health services in Chile. *Midwifery*. 2016;35:53-61
3. Janani F, Kohan S, Taleghani F, Ghafarzadeh M. Challenges to implementing physiologic birth program (PBP): A qualitative study of midwives' opinions in Iran. *Acta Medica Mediterranea* 2015;31:1373
4. Kennedy HP, Doig E, Tillman S, Straus A, Williams B, Pettker C, Illuzzi J. Perspectives on Promoting Hospital Primary Vaginal Birth: A Qualitative Study. *BIRTH* 2016;43:336-345
5. Darling F. Practitioners' views and barriers to implementation of the keeping birth normal tool: A pilot study. *BJM* 2016. <https://doi.org/10.12968/bjom.2016.24.7.508>
6. Kerrigan A, Kingdon C, Cheyne H. Obesity and normal birth: A qualitative study of clinician's management of obese pregnant women during labour. *BMC Pregnancy and Childbirth* 2015;15:256.
7. Cheyne H, Abhyankar P, McCourt C. Empowering change: Realist evaluation of a Scottish Government programme to support normal birth. *Midwifery* 2013;29:1110-1121.
8. Hunter B. Implementing a National Policy Initiative to Support Normal Birth: Lessons from the All Wales Clinical Pathway for Normal Labour. *J Midwifery Womens Health* 2010;55:226-233.
9. Hunter B, Segrott J. Using a Clinical Pathway to Support Normal Birth: Impact on Practitioner Roles and Working Practices. *BIRTH* 2010;37:227-235
10. Hunter B, Segrott J. Renegotiating inter-professional boundaries in maternity care: implementing a clinical pathway for normal labour. *Sociology of Health & Illness* 2014;36:719-737.
11. Behuruza R, Hatem M, Fraser W, Goulet L, li M, Misago C. Facilitators and barriers in the humanization of birth in Japan. *BMC Pregnancy and Childbirth* 2010;10:25
12. Kennedy HP, Grant J, Walton C, Shaw-Battista J, Sandall J. Normalizing birth in England: A qualitative study. *Journal of Midwifery and Women's Health* 2010;55: 262-269.
13. Kennedy HP, Grant J, Sandall J. Elective caesarean delivery: A mixed-method qualitative investigation. *Midwifery* 2013;29:e138-e144
14. Huang K, Tao FB, Faragher B, Raven J, Tolhurst R, Tang S, van den Broek N. A mixed-method study of factors associated with differences in caesarean section rates at community level: The case of rural China. *Midwifery* 2013;29(8): 911-20.
15. Bagheri A, Masoudi Alavi N, Abbaszadeh F. Iranian obstetricians' views about the factors that influence pregnant women's choice of delivery method: A qualitative study. *Women and birth* 2013;26(1):e45-9.
16. Weaver JJ, Statham H, Richards M. Are there "unnecessary" caesarean sections? Perceptions of women and obstetricians about caesarean sections for non-clinical indications. *BIRTH* 2007;34:32-41.
